# Supplementary material for: Elucidation of the key role of Pt···Pt interactions in the directional self-assembly of platinum(II) complexes
Source: PubMed Central journal article supplement — Proc Natl Acad Sci U S A. 2022 Mar 17;119(12):e2116543119. doi: 10.1073/pnas.2116543119 (PMC8944581; doi:10.1073/pnas.2116543119), 2022-03-17
Supplement: pnas.2116543119.sapp.pdf [file pnas.2116543119.sapp.pdf]

## Supporting Information

### Elucidation of the Key Role of Pt··Pt Interactions in the Directional Self-Assembly of Platinum(II) Complexes

Xiaoyan Zheng<sup>1,†</sup>, Michael Ho-Yeung Chan<sup>2,†</sup>, Alan Kwun-Wa Chan<sup>2,†</sup>, Siqin Cao<sup>3#</sup>, Maggie Ng<sup>2</sup>, Fu Kit Sheong<sup>3</sup>, Chu Li<sup>3</sup>, Eshani Chrisana Goonetilleke<sup>3#</sup>, William Wai Yan Lam<sup>4</sup>, Tai-Chu Lau<sup>5</sup>, Xuhui Huang<sup>3#\*</sup>, Vivian Wing-Wah Yam<sup>2\*</sup>

<sup>1</sup>Key Laboratory of Cluster Science of Ministry of Education, Beijing Key laboratory of Photoelectronic/Electro-photon Conversion Materials, School of Chemistry and Chemical Engineering, Beijing Institute of Technology, Beijing, 100081, China.

<sup>2</sup>Institute of Molecular Functional Materials, State Key Laboratory of Synthetic Chemistry and Department of Chemistry, The University of Hong Kong, Pokfulam Road, Hong Kong, People's Republic of China

<sup>3</sup>Department of Chemistry, The Hong Kong University of Science and Technology, Kowloon, Hong Kong

<sup>4</sup>Faculty of Science and Technology, Technological and Higher Education Institute of Hong Kong, Tsing Yi Road, Tsing Yi Island, Hong Kong, People's Republic of China

<sup>5</sup>Department of Chemistry, City University of Hong Kong, Tat Chee Avenue, Kowloon Tong, Hong Kong, People's Republic of China

<sup>†</sup>X.Z., M.H.-Y.C. and A.K.-W.C. contributed equally to this work.

\*To whom correspondence may be addressed. Email: wwyam@hku.hk or xuhuihuang@ust.hk.

#Current address: Department of Chemistry, University of Wisconsin-Madison, Madison, Wisconsin, 53706, U.S.A

## 1. Supplementary details of experiments

**Details of the stopped-flow experiments.** Kinetic experiments were performed using an Applied Photophysics SX20 stopped-flow spectrophotometer. The temperature of the solutions was maintained with a PolyScience digital temperature controller connected to a circulating water bath. PtB was dissolved in acetone-water (3:1 v/v) mixture, and it was then mixed with acetone, finally reaching a volume ratio of acetone-water of 7:1 (v/v). The total concentration of PtB is  $2.25 \times 10^{-4}$  M. The experiments were conducted at 298 K. The absorbance changes at 594 nm were measured as an indication of the degree of aggregation attributed to the formation of metal–metal interactions.

## 2. Supplementary Computational Methods

### 2.1. Fitting the UV curves to an isodesmic model.

The proportion of aggregates in the solution can also be modelled with isodesmic model. In this model, the fraction of aggregates ( $\alpha_{agg}$ ) can be calculated with a sigmoid equation:

$$\alpha_{agg}(T) = \frac{1}{1 + \exp\left[-0.908\Delta H \frac{T - T_m}{RT_m^2}\right]} \quad (S1)$$

Here  $\Delta H$  is the enthalpy change upon addition of a monomer onto an existing aggregate,  $T_m$  is the melting temperature, which is defined as the temperature for which  $\alpha_{agg}(T) = 0.5$ .  $\alpha_{agg}$  is the normalized fraction of aggregates, where  $\alpha_{agg} = 1$  corresponds to the 100% fraction of aggregates. To derive  $\alpha_{agg}(T)$  from experiment, we need to perform normalization on the observed absorption coefficient  $A(T)$ :

$$\alpha_{agg}(T) = \frac{A(T) - A_m}{A_A - A_m} \quad (S2)$$

where  $A_A$  and  $A_m$  are the maximum and minimum values of absorption coefficient.  $A_A$  corresponds to 100% of the aggregate fractions, while  $A_m$  corresponds to 0% of aggregate fractions. Finally,  $A_A$  and  $A_m$  need to be fitted together with  $T_m$  and  $\Delta H$  with the experimental UV spectra data.

We have adopted a similar brute force searching in isodesmic models of experimental data, where all possible combinations of  $\{A_m, A_A, T_m, \Delta H\}$  have been tested to fit with UV spectra data at all temperatures. A series of combinations of  $\{A_m, A_A, T_m, \Delta H\}$  can fit well with experimental results as shown in (Fig. 1c). Among these combinations, the best fitting appears when  $\Delta H = -33 \pm 3$  kJ/mol.

### 2.2. Fitting the UV curves to a cooperative growth model via the nucleation-elongation theory.

The proportion of aggregates in the solution can be modelled using the nucleation-elongation model. In this model, the fraction of aggregates ( $\alpha_{agg}$ ) can be calculated using elongation theory when the temperature is lower than the elongation temperature ( $T_e$ ). Alternatively, when temperature is higher than the elongation temperature, nucleation-theory is used to calculate  $\alpha_{agg}$ .

**The elongation theory:** In the elongation phase, the fraction of aggregates ( $\alpha_{agg}$ ) can be calculated with the Van't Hoff's theory, which finally leads to(1):

$$\alpha_{agg}(T) = 1 - e^{-\frac{H_e}{RT_e^2}(T-T_e)} \quad (S3)$$

Here,  $\alpha_{agg}$  has the same definition as in Eq. (S1) and corresponds to the normalized fraction of aggregates.  $\alpha_{agg}(T)$  can be obtained from the experimental absorption coefficient ( $A(T)$ ) using Eq. (S2). Combing Eq. (S2) and Eq. (S3), we can then obtain the equation to fit:

$$1 - \alpha_{agg}(T) = 1 - \frac{A(T) - A_m}{A_A - A_m} = e^{-\frac{H_e}{RT_e^2}(T-T_e)} \quad (S4)$$

Here,  $H_e$  is the enthalpy change due to non-covalent interactions during elongation. In this equation,  $A_A$ ,  $A_m$ ,  $T_e$ , and  $H_e$  are fitting parameters.

With an exhaustive search for all possible combinations of  $\{A_A, A_m, T_e, H_e\}$  that can fit with the UV spectra in the elongation phase, a series of combinations of  $\{A_A, A_m, T_e, H_e\}$  that all fit well with experimental results can be found (Fig. 2b). We can then obtain  $H_e = -15.8 \pm 2.3$  kJ/mol (Fig. 2b).

**The nucleation theory:** In the nucleation phase, the fraction of aggregates is calculated using nucleation theory(1):

$$\alpha_{agg}(T) = K_a^{1/3} e^{\left(\frac{2}{3K_a^{1/3}} - 1\right) \frac{H_e}{RT_e^2} (T - T_e)} \quad (S5)$$

Since  $A_A$ ,  $A_m$ ,  $T_e$ , and  $H_e$  have already been obtained in the elongation phase, the only additional parameter in the nucleation phase, the equilibrium constant of activation  $K_a$ , can be fitted with the experimental data in the nucleation region.

The average size of the nucleus at elongation temperatures is given by(1):

$$\overline{N_n(T_e)} = K_a^{-1/3} \quad (S6)$$

Two examples of the cooperative nucleation-elongation models for bi-PtB and bi-PtT complexes are shown in Fig S1a-b and Fig. S1c-d, respectively. Both bi-PtB (Fig. S1b) and bi-PtT (Fig. S1d) clearly show non-sigmoidal curves and can be fitted to the cooperative nucleation-elongation model.(1, 2) In these nucleation-elongation models, extremely small equilibrium constants (e.g.  $K_a = 1.14 \times 10^{-4}$  or  $6.8 \times 10^{-4}$ )(1, 2) for the nucleation process were found at the elongation temperature ( $T_e$ ), indicating an unfavorable nucleation process at  $T_e$ .

### 2.3. An extended kinetic nucleation-growth model to fit data from the stopped-flow experiments.

To fit the kinetic data obtained from the stopped-flow experiments, we developed a nucleation-growth model that considers three kinetic processes in the self-assembly of PtB: the formation of nucleus, growth of the fibril aggregates, and merging of smaller aggregates into large ones (see below for details).

**(a) The formation of nucleus:** Following our previous work,(3) we built a modified nucleation theory based on the classical nucleation theory (CNT). This CNT is only applicable to rigid monomer with spherical shape, and we thus introduce a pre-exponential factor  $A_{\text{conf}}$  to treat the non-spherical and flexible PtB molecule:

$$J_n(t) = A_{\text{conf}} \cdot \left[ (36\pi)^{1/6} \frac{DC_e}{v^{2/3}} \right] \frac{1}{\sqrt{\theta}} (S(t) \ln S(t)) e^{-4\theta^3/27 \ln^2 S(t)} \quad (S7)$$

$$C_n = J_n(t) dt$$

where  $J_n(t)$  is the nucleation rate,  $C_n$  is the concentration of aggregates formed at  $t_n = ndt$ .  $D$  is the

diffusion constant of PtB in solvent mixture,  $C_e$  is the solubility of PtB,  $v$  is the volume of PtB,  $S(t)$  is the saturation ratio, and  $\theta$  is related to the PtB-water interaction and can be obtained by fitting to the experimental data.  $A_{\text{conf}}$  is a pre-exponential factor that is related to the entropy change of monomer attachment to an existing aggregate.

**(b) Growth of the fibril aggregates:** Similar to the previous study,(3) we next consider the subsequent growth of the nucleus. For those nuclei formed at  $ndt$ , they will further grow to form aggregates with the average size  $g_n(t)$  at time  $t$  ( $t > ndt$ ):

$$f_n(t) = A_{\text{conf}} \cdot 4\pi DC_e S(t) R_1$$

$$\frac{dg_n(t)}{dt} = f_n(t) - f_n^e(t) = A_{\text{conf}} \cdot 4\pi DC_e (S(t) - 1) R_1 \quad (\text{S8})$$

where  $R_1$  is the radius of the PtB monomer. As shown in Eq. (S7),  $A_{\text{conf}}$  is a pre-exponential factor to take into account the conformational change associated with the kinetic process of a PtB monomer attaching to an existing aggregate. Therefore, we can obtain  $A_{\text{conf}}$  from the  $-T\Delta S_{\text{conf}}$  term of the free energy computed from the nucleation-growth theory (see SI Sec. 2.1 for details):  $-T\Delta S_{\text{conf}} = kT \ln A_{\text{conf}}$ , which can be obtained from  $\Delta G_e = \Delta H_e - T\Delta S_{\text{conf}}$ .  $\Delta G_e$  refers to the free energy change of transfer of a PtB molecule from aggregate to solution and can be computed from the solubility  $C_e$ . We obtained the solubility  $C_e$  from  $C_e = (1 - \alpha(298\text{K})) \times C_{\text{total}}$ , where  $\alpha(298\text{K}) = 0.5$  (see Fig. 2). As the total concentration of PtB ( $C_{\text{total}}$ ) is  $2.25 \times 10^{-4}$  M in our experiment, the solubility  $C_e$  can then be obtained as  $1.12 \times 10^{-4}$  M.  $\Delta H_e = -15.8$  kJ/mol is the elongation enthalpy derived from the UV-Vis experiments (see Fig. 2 and SI Sec. 2.2 for details).

**(c) Merging of small aggregates into larger ones:** The original kinetic growth model (Eq. (S8)) was developed to fit the microfluidics data where the aggregation process occurs at sub-millisecond(3) timescale. However, the stopped-flow experiment in this work monitors the dynamics of the self-assembly at much longer timescales: i.e., seconds to hundreds of seconds. During this period, there is sufficient time for small aggregates (or shorter fibrils) to collide and merge into longer ones. Therefore, it is necessary to modify the original kinetic growth model to take into account this merging process.

In our growth model as shown in Eq. (S8), the elongated aggregates in the fibril shape can only grow from the two ends by addition of PtB monomers (so called ‘‘monomer-attachment sites’’). However, the kinetic process of merging short fibrils into longer ones would compete with this native fibril growth, and thus occupy a fraction of available monomer-attachment sites. This is because the merging of two short fibrils will eliminate two monomer-attachment sites (the two sites where the

two ends of short fibrils meet), while the elongation of fibril by addition of PtB monomer will not change the number of the monomer-attachment sites. To consider this additional kinetic process, we introduced a quantity  $\sigma_n(t)$  to describe the reduction in the fraction of available monomer-attachment sites in those aggregates that grow from nuclei formed at  $ndt$ . Correspondingly, the original growth model can be modified as below:

$$f_n(t) = A_{\text{conf}} \cdot 4\pi DC_e S(t) R_1 \sigma_n(t) \quad (\text{S9})$$

$$\frac{dg_n(t)}{dt} = f_n(t) - f_n^e(t) = A_{\text{conf}} \cdot 4\pi DC_e (S(t) - 1) R_1 \sigma_n(t)$$

where  $\sigma_n(t)$  initially equals 1 and decreases as time elapses. In general, the merging process will lead to a reduced aggregate concentration:  $C'_n(t) = C_n \sigma_n(t)$  ( $\sigma_n(t) \leq 1$ ) and produce larger-sized aggregates:  $g'_n(t) = g_n(t)/\sigma_n(t)$ . The time evolution of  $\sigma_n(t)$  can then be described by the following equation:

$$\frac{d\sigma_n(t)}{dt} = -\gamma_n \sigma_n(t) \sum_i \sigma_i(t) C_i \quad (\text{S10})$$

where each of the quartic term on the r.h.s. (i.e.,  $-\gamma_n \sigma_n(t) \sigma_i(t) C_i$ ) describes the kinetic process where a given fibril-shaped aggregate can merge with another one at either of its two ends. We presume that the rate constant  $\gamma_n$  is independent of the aggregate size:  $\gamma_1 = \gamma_2 = \dots = \gamma$ . Finally, we can obtain the total number of PtB molecules that are in the aggregates:

$$I(t) = \sum_i g'_i(t) C'_i(t) = \sum_i g_i(t) C_i \quad (\text{S11})$$

Combining Eq. (S7), (S9), (S10) and (S11), we can obtain  $I(t)$  which should be proportional to the observations from the UV absorbance in the stopped-flow experiment. As shown in Fig. 3, our extended kinetic nucleation-growth model fits well to the stopped-flow experimental data, and the fitted values of the two variables are  $\gamma = 3.1 \times 10^4 \text{ M}^{-1}\text{s}^{-1}$  and  $\theta = 10.3 \text{ kJ/mol}$ . The fitted results clearly indicate that there exists a nucleation phase at the early stage of self-assembly.

#### 2.4. Potential functional forms in Amber force field.

We developed force field parameters for Pt(II) complexes based on the same functional form originally used in the AMBER force field.(4-6) In the AMBER force field, the potential function describing interactions among particles consists of bonded and non-bonded interactions. The functional forms are defined as:

$$\begin{aligned}
E = & \sum_{bonds} \frac{K_b}{2} (b - b_{eq})^2 + \sum_{angles} \frac{K_\theta}{2} (\theta - \theta_{eq})^2 \\
& + \sum_{torsions} V_n [1 + \cos(n\phi - \gamma)] + \sum_{i < j} 4\epsilon_{ij} \left[ \left( \frac{\sigma_{ij}}{R_{ij}} \right)^{12} - \left( \frac{\sigma_{ij}}{R_{ij}} \right)^6 \right] \quad (S12) \\
& + \sum_{i < j} \frac{q_i q_j}{4\pi\epsilon_0 R_{ij}}
\end{aligned}$$

The first three terms represent bonded interactions, describing the bond, angle, and torsion interactions, respectively. The last two terms represent non-bonded interactions, including van der Waals (vdW) and electrostatics interactions.  $K_b$  and  $K_\theta$  are the force constants for the bonds and angles, respectively;  $b_{eq}$  and  $\theta_{eq}$  represent the bond length and bond angle of the equilibrated conformation;  $b$  and  $\theta$  represent the bond length and bond angle, respectively.  $\phi$  and  $V_n$  represent the torsional angle and force constant, respectively;  $n$  is an integer describing the periodicity.  $\gamma$  is the phase angle with a value of  $0^\circ$  or  $180^\circ$ . The 12-6 Lennard-Jones (LJ) potential is used to describe the pair-wise vdW interaction. Here,  $\epsilon_{ij}$  is the depth of the potential well,  $\sigma_{ij}$  is the finite distance at which the inter-particle potential is zero, and  $R_{ij}$  is the distance between the particles. Furthermore, the electrostatic potential is described by the Coulomb interactions between pairs of particles with atomic partial charges  $q_i$  and  $q_j$ , and the force field parameters were developed to reproduce the relative potential energies obtained from the QM calculation. Here, all the QM calculations were performed using the Gaussian 09 program package(7), and all the molecular mechanics calculations and MD simulations were performed with GROMACS (version 4.5.5) program.

**Bonded parameters between Pt(II) and ligands.** We set up the force field parameters for the aromatic ligands using the general amber force field (GAFF)(4). The central Pt(II) atom in each Pt(II) complex has coordination bonds with three nitrogen atoms on the aromatic ring and one chloride atom (PtB and PtB-b) or carbon atom (PtB-a) on the substitute. The harmonic potential was added to describe the coordination bond between the central Pt(II) atom and the ligands.

**Select typical Fragment PtB-core from PtB.** To get the force field parameters of Pt(II) atom in Pt(II) complexes, and to make the force field parameters transferable, the representative Pt(II) core was selected and termed PtB-core shown in Fig. 4a. Then, we chose PtB-core as the starting point for QM optimization and charge derivation. Similar to previous studies,(8) the geometric optimization of the Fragment monomer was carried out at the TPSS-D3/def2-TZVP level.(9-11)

## 2.5. Fitting the LJ parameters for Pt in PtB-core.

The force field parameters of Fragment were set up using the General Amber force field (GAFF), except for the Pt(II) atom. The geometric structure of a single PtB-core was first optimized at the TPSS-D3/def2-TZVP level. Then, the partial charge of each atom was fitted using the restrained

electrostatic potential (RESP) method(12, 13) to reproduce the electrostatic potential(14) of the optimized structures. The force field model for Pt(II) complexes was termed as PtFF.

To fit the LJ parameters of Pt in PtB-core, we scanned the intermolecular Pt...Pt distance vertically from 3.0 Å to 7.0 Å at a step size of 0.2 Å. The fitting procedure is as follows: (1) Optimize the geometric structure of a single PtB-core at the TPSS/def2-TZVP level; (2) Optimize the dimer of PtB-core packed in the antiparallel fashion using Gaussian 09 at the TPSS/def2-TZVP level; (3) Calculate the QM potential energy profile as a function of Pt...Pt distance ranging from 3.0 Å to 7.0 Å at a step size of 0.2 Å in the vertical direction; (4) Calculate the MM potential energy profiles of PtFF based on the geometric structures obtained from the QM scan. During the MM calculation, the LJ parameters for Pt(II) were set to zero, termed as  $MM_{noPt}$ ; (5) Fit the LJ parameters of the Pt(II) atom for the PtB-core dimer in the three force field models by minimizing the relative potential energy difference between the QM and MM profile iteratively; (6) Validate the fitted LJ parameters for PtB-core using the PtFF model by scanning the Pt...Pt distance of the PtB-core dimer along the long-axis and short-axis. Here, the long axis is the direction parallel to the connection between two bzipmy moieties of the ligand, and the short axis is the direction along the middle Pt-N bond of PtB-core (see Fig. S2).

## 2.6. Validating force field parameters.

We first checked if the developed LJ parameters of PtB-core along the vertical direction could reproduce the QM energy profile as a function of Pt...Pt distance (ranging from 3.0 Å to 7.0 Å with the step size of 0.2 Å) along the long axis and the short axis of dimer by using PtFF (Fig. S4b). The corresponding QM and MM potential energy profiles of PtB-core along the vertical, long-axis, short-axis directions are summarized in Fig. S4b.

Second, the force field parameters were validated using two isolated Pt(II) complexes, PtB-a and PtB-b, by comparing the conformational changes between the energy minimized conformation obtained from the MM method and the optimized structure obtained from the QM method. The obtained RMSD value is summarized in Table S2. The force field parameters for PtB, PtB-a, and PtB-b were setup using GAFF, where the LJ parameters of Pt(II) were filled by our new fitted LJ parameters. In molecules PtB, PtB-a and PtB-b, the corresponding partial charge of each atom was obtained using the RESP method, which could reproduce the calculated electrostatic potential with PtB-core. The geometric structures of the PtB-a and PtB-b monomers were optimized at the TPSS/def2-TZVP level using the QM method before the electrostatic potential was calculated.

To further validate the force field parameters, MD simulations were performed for the crystal structures of PtB-a and PtB-b. For each Pt(II) complex, the supercells were constructed based on the experimental crystal structures(15, 16) using PtFF. The details of the supercells for all PtB-a and PtB-b complexes were collected and are summarized in Table S4. Then, to validate the fitted LJ parameters



of the Pt(II) atom in each system, we performed the following calculations (all the RMSD calculations were performed only for the heavy atoms of the Pt complexes): First, the supercells of each Pt(II) complex were energy minimized with the steepest descent algorithm. Second, we calculated the RMSD between the energy minimized structure of each supercell and the initial conformation of the supercell in crystal structure and summarized the results in Table S2. Third, we performed a 100 ps MD simulation with position restraints on the heavy atoms with force constants of  $1000 \text{ kJ mol}^{-1} \text{ \AA}^{-2}$  under an isothermal (300 K) ensemble (NVT) using the Berendsen thermostat(17) with a coupling time constant of 0.1 ps. Finally, we carried out a 10 ns production MD simulation for each Pt(II) system. The temperature was slowly increased from 50 to 300 K (close to the crystallization temperature) during the initial 1 ns of the simulation, and the temperature was maintained at 300 K in the remaining 9 ns of the simulation. We carried out the production MD simulations under an isothermal (300 K), isobaric (1 bar) ensemble (NPT) using the V-rescale thermostat(18) and the Berendsen barostat(17) with a coupling time constant of 0.1 and 1.0 ps, respectively. The long-range electrostatic interactions beyond the cutoff at 12 Å were considered using the Particle Mesh Ewald (PME) method, and the LJ interactions were smoothly switched off between 10 and 11 Å. The updated frequency of the neighbor list was 10 steps, and the integration time step was 1.0 fs. The last frame of the production MD simulation was used for RMSD computation, as well as the change of unit cell size relative to the initial supercell set up from experimental crystal structures.

## **2.7. MD simulation and analysis of self-assembly of PtB Oligomers.**

To understand the self-assembly mechanism of amphiphilic Pt(II) complexes, oligomer formation at the early stage of self-assembly in aqueous solutions for the representative Pt(II) complex, PtB, was set up using atomistic MD simulations. Here, PtB oligomers with aggregate sizes: 2, 3, 6, and 10 were considered. The initial conformations were generated by randomly placing 2, 3, 6, and 10 PtB molecules in cubic simulation boxes with an edge length of 6 nm. The total number of water molecules when the oligomer aggregate size was 2, 3, 6, and 10 were 6933, 6902, 6820, and 6700, respectively. All water molecules here were modelled by TIP3P force field. For each oligomer system, we first performed energy minimization before running a 2 ns MD simulation with position restraints (the force constants of  $1000 \text{ kJ mol}^{-1} \text{ \AA}^{-2}$ ) on the heavy atoms under the NVT ensemble (300 K) using a Berendsen thermostat(17) with a coupling time constant of 0.1 ps. Then, 10 production MD trajectories, 100 ns for each trajectory, were carried out for each PtB oligomer size. The temperature was slowly increased from 50 to 300 K during the initial 2 ns of the simulation, and then the temperature was maintained at 300 K. The production MD simulations were carried out under the NPT (300 K, 1 bar) ensemble using the V-rescale thermostat(18) and Parrinello-Rahman barostat(19) with the coupling time constant of 0.1 and 1.0 ps, respectively. The long-range electrostatic interactions beyond the cutoff at 12 Å were considered using the Particle Mesh Ewald (PME) method,

and the LJ interactions were smoothly switched off between 10 and 11 Å. The updated frequency of the neighbor list was 10 steps, and the integration time step was 2.0 fs. The representative snapshots of the PtB oligomers are shown in Fig. 6a and Fig. S5.

**Controlled MD simulations.** To consider the influence that the Pt··Pt interactions may have on the self-assembled structure of PtB, we performed controlled MD simulations for Pt<sup>s</sup>B without d<sup>8</sup>-d<sup>8</sup> interactions using the same setup as the above simulations of PtB. In our force fields, the d<sup>8</sup>-d<sup>8</sup> interactions between PtB molecules are mainly captured by tuning the LJ parameters of the Pt atom (see SI Sec 2.5 for details). Therefore, when designing the control system in the absence of d<sup>8</sup>-d<sup>8</sup> interactions (i.e., Pt<sup>s</sup>B), we take the published LJ parameters(20) for the Pt(II) atom in Pt<sup>s</sup>B ( $\sigma = 0.43475$  nm,  $\epsilon = 1.674$  kJ/mol, Table S1). In this set of parameters, the  $\epsilon$  of the Pt atom is significantly smaller than that of PtB in our force field, rendering the long-range d<sup>8</sup>-d<sup>8</sup> interactions almost negligible between two Pt<sup>s</sup>B molecules (Fig. 5a). Except for LJ parameters, all other force field parameters for PtB and Pt<sup>s</sup>B are the same. And then we deleted the Pt(II) atoms from the PtB system (termed Pt-free) and performed the second controlled MD simulations (shown in Fig. S6). We found that several small randomly packed oligomers formed in the aqueous solution, showing that without Pt, the non-planar ligands could only aggregate via hydrophobic interactions in aqueous solutions, and the linear packing disappears without long-range directional Pt··Pt and  $\pi$ - $\pi$  interactions.

**RMSF calculations and Angle distribution analysis.** We conducted the RMSF and angle distribution analyses after the linear-assembled structure was formed in MD simulations. For the RMSF analysis, the average distance between the backbone atoms (e.g., Pt atoms) and their corresponding atoms that occurred  $\Delta t$  ahead, was calculated over different  $\Delta t$ . After projecting the two adjacent PtB molecules into the same plane, the rotational angle between the two adjacent PtBs can also be obtained, as shown in Fig. 6c. For the angle distribution analysis, each PtB molecule was treated as a PtB plane by its core molecules and the angle between each pair of neighboring PtB planes could be calculated, as shown in Fig. 6d.

**Non-covalent interactions analysis.** All density functional theory (DFT) calculations were performed with the Gaussian 09 software package. The ground-state geometries of the dimer and trimer of PtB were fully optimized by DFT at the M06 level(21) in conjunction with the solvation model density (SMD) continuum method(22) using water as the solvent. Vibrational frequencies were then computed for all stationary points to verify that each was a minimum on the potential energy surface (NIMAG = 0). The Cartesian coordinates of the optimized geometries of the dimer and trimer of PtB are given in Tables S5 and S6. The Stuttgart effective core potentials (ECPs) and the associated basis set were used to describe Pt(23) with two f-type polarization functions ( $\zeta = 0.70$  and  $0.14$ ),(24) whereas the 6-31G(d,p) basis set was employed to describe all other atoms.(25-28) All DFT calculations were performed with a pruned (99,590) grid for numerical integration. Noncovalent

interaction (NCI) analysis of the dimer and trimer has been performed on the geometry optimized at the M06 level by NCIPLOT.(29)

## Supplementary Figures and Tables:

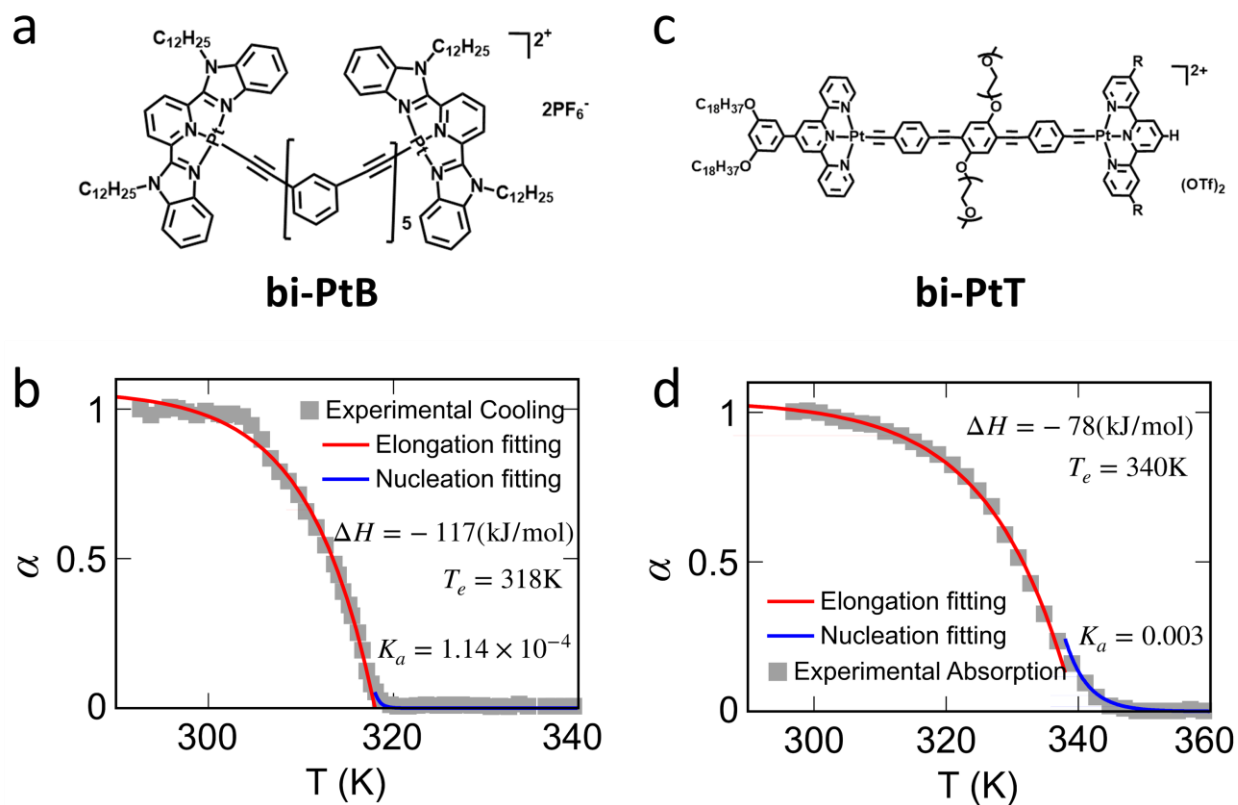

**Figure S1. The chemical structure and fitted curve of bi-PtB and bi-PtT.** (a) Chemical structure of bi-PtB. (b) The fraction of aggregation of bi-PtB obtained from the UV absorption data (dashed points) as a function of temperature. The fraction of aggregation was fitted to the cooperative nucleation-elongation model (red and blue curves represent elongation and nucleation, respectively). (2) (c) Chemical structure of bi-PtT. (d) Similar to (b) except the experimental data was fitted to the nucleation-elongation model for bi-PtT. (1)

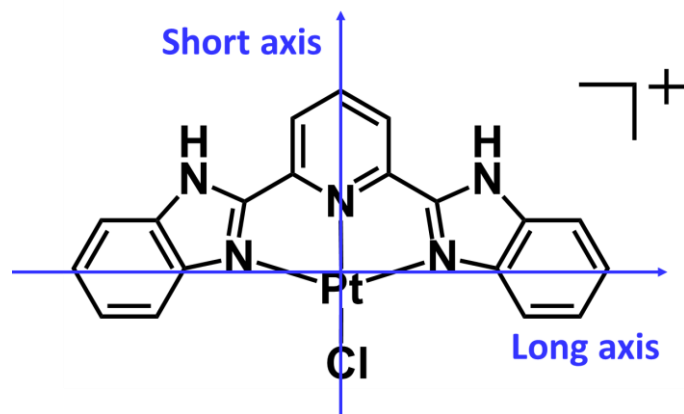

**Figure S2.** The definition of the long axis and short axis in the PtB-core.

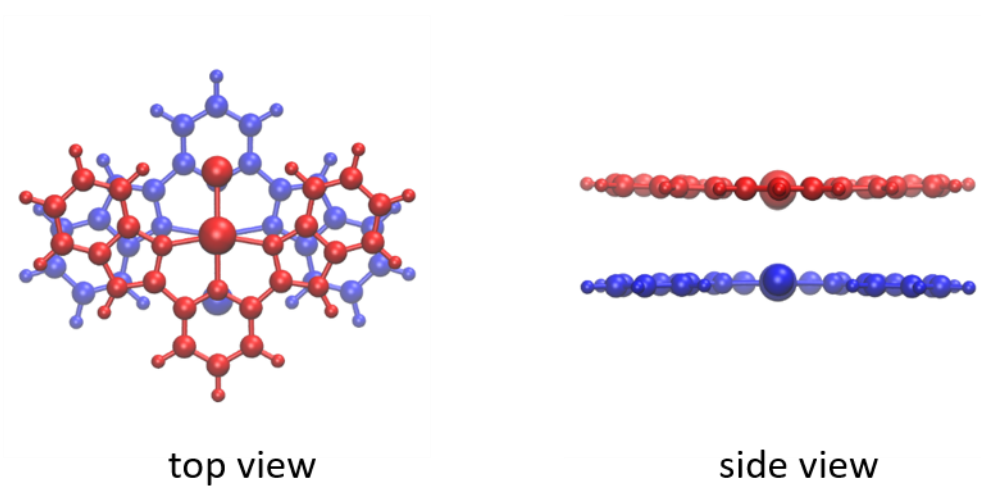

**Figure S3.** Dimer configurations for PtB-core at both top and side view.

### a Pt<sup>5</sup>B-core

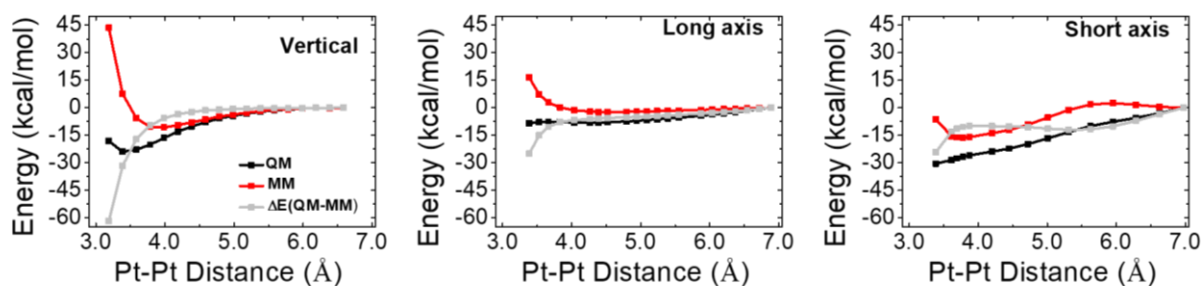

### b PtB-core in PtFF model

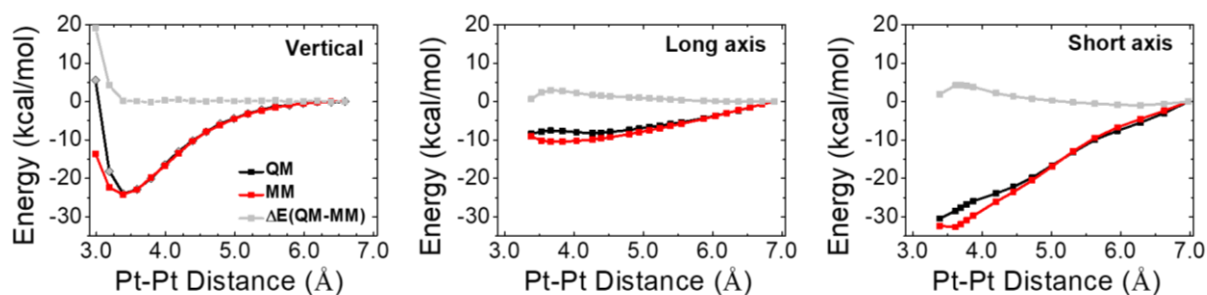

**Figure S4. The potential energy profiles as a function of Pt···Pt distances in PtB-core dimers.** The results obtained using QM (black curves) and MM (red curves) calculations are shown. The grey curves represent the differences between the QM and MM results:  $\Delta E = E(\text{QM}) - E(\text{MM})$ . The potential energy profiles for (a) Pt<sup>5</sup>B-core, (b) PtB-core using the PtFF model, along the vertical (left panel), long-axis (middle panel) and short-axis (right-panel), respectively.

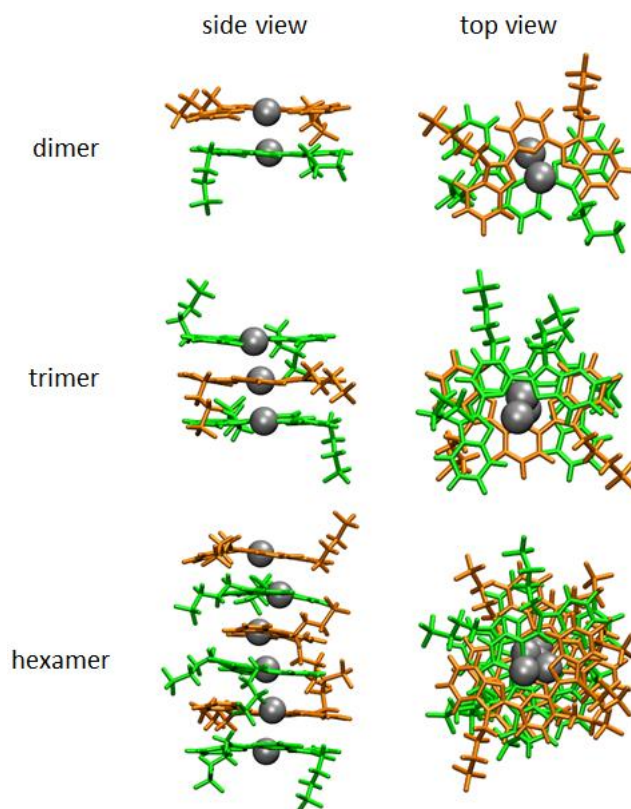

**Figure S5.** Snapshots of typical assembled PtB oligomers: dimer, trimer, and hexamer in both side view and top view, respectively.



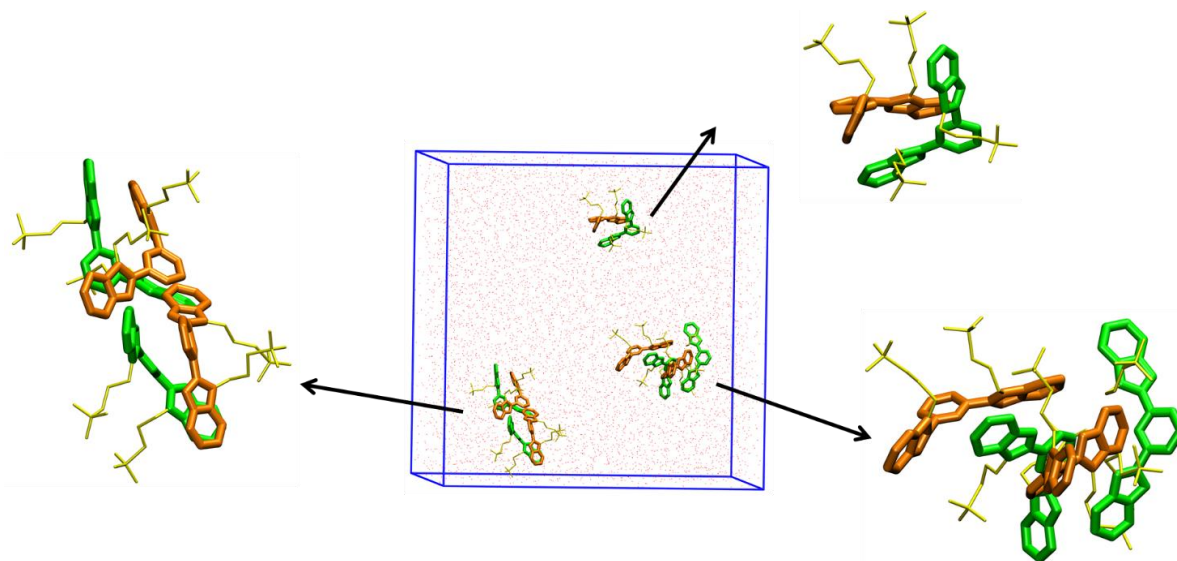

**Figure S6. Representative snapshot of the assembled aggregates of Pt-free molecules.** The Pt-free molecules aggregate randomly and cannot pack linearly.

**Table S1.** The LJ force field parameters for Pt<sup>s</sup>B-core (see reference (20)) and PtB-core in different force field models.

|                        | $\sigma$ (nm) | $\epsilon$ (kJ/mol) |
|------------------------|---------------|---------------------|
| Pt <sup>s</sup> B-core | 0.43475       | 1.674               |
| PtB-core               | 0.33298       | 10.534              |

**Table S2.** RMSD comparison for PtB-a and PtB-b crystal structures to validate the LJ parameters for a Pt(II) atom.

| Crystals      | Initial structure | Method          | Condition | RMSD (Å) |
|---------------|-------------------|-----------------|-----------|----------|
| In PtFF model |                   |                 |           |          |
| crystal PtB-a | single QM         | MM optimization | vacuum    | 0.015    |
|               | crystal structure | MM optimization | crystal   | 0.049    |
|               | crystal structure | MD simulation   | crystal   | 0.455    |
| crystal PtB-b | single QM         | MM optimization | vacuum    | 0.036    |
|               | crystal structure | MM optimization | crystal   | 0.081    |
|               | crystal structure | MD simulation   | crystal   | 0.456    |

**Table S3.** Box vector comparison for PtB-a and PtB-b crystal structures to validate the LJ parameters of a Pt(II) atom.

| Molecule      | Model      | $a$ (Å) | $b$ (Å) | $c$ (Å) | Volume (Å <sup>3</sup> ) | Volume change |
|---------------|------------|---------|---------|---------|--------------------------|---------------|
| crystal PtB-a | experiment | 22.37   | 27.37   | 14.95   | 8337.47                  | 2.10%         |
|               | MD         | 22.21   | 27.18   | 14.84   | 8162.28                  |               |
| crystal PtB-b | experiment | 26.983  | 8.530   | 25.018  | 5081.20                  | 1.86%         |
|               | MD         | 27.149  | 8.583   | 25.172  | 5175.87                  |               |
|               | MD         | 27.164  | 8.587   | 25.185  | 5184.35                  |               |

**Table S4.** The details of the PtB-a and PtB-b supercells.

| systems         | size  | The composition in the supercells                                                                         |
|-----------------|-------|-----------------------------------------------------------------------------------------------------------|
| PtB-a supercell | 3×3×3 | 216 PtB-a, 216 SO <sub>3</sub> CF <sub>3</sub> <sup>-</sup> ions and 324 CH <sub>3</sub> CN molecules     |
| PtB-b supercell | 3×4×3 | 288 PtB-b, 288 PF <sub>6</sub> <sup>-</sup> ions and 288 (CH <sub>3</sub> ) <sub>2</sub> NC(O)H molecules |

**Table S5.** Cartesian coordinates of the optimized ground-state geometry of the dimer of PtB at the M06 level.

|    |    |           |           |           |     |    |           |           |           |
|----|----|-----------|-----------|-----------|-----|----|-----------|-----------|-----------|
| 1  | C  | -0.754073 | 4.250334  | -0.160389 | 54  | N  | 0.064770  | 2.195236  | -0.997432 |
| 2  | C  | 0.560645  | 4.661596  | 0.021425  | 55  | S  | -4.805927 | 4.798375  | 3.635811  |
| 3  | C  | 1.627475  | 3.833187  | -0.308901 | 56  | S  | 5.922925  | 5.711225  | -3.152380 |
| 4  | H  | -1.569257 | 4.904541  | 0.126672  | 57  | O  | -3.553468 | 4.194013  | 4.158871  |
| 5  | H  | 2.645351  | 4.179284  | -0.166062 | 58  | O  | -5.960680 | 3.863432  | 3.690504  |
| 6  | C  | 2.265471  | 1.491894  | -1.202428 | 59  | O  | -5.106572 | 6.125342  | 4.226345  |
| 7  | C  | 2.782254  | -0.515470 | -1.909022 | 60  | O  | 4.577640  | 6.264215  | -3.453254 |
| 8  | C  | 3.976755  | 0.189322  | -1.675849 | 61  | O  | 6.476826  | 4.902630  | -4.267845 |
| 9  | C  | 2.800865  | -1.838526 | -2.361437 | 62  | O  | 6.872585  | 6.732399  | -2.645536 |
| 10 | C  | 5.228896  | -0.382747 | -1.902717 | 63  | Cl | -0.747883 | -1.822721 | -2.406456 |
| 11 | C  | 4.043323  | -2.406188 | -2.584069 | 64  | Cl | 1.646140  | -3.798627 | 0.504849  |
| 12 | H  | 1.872889  | -2.378619 | -2.531643 | 65  | Cl | 0.624908  | -4.673993 | 0.151825  |
| 13 | C  | 5.236269  | -1.688564 | -2.363844 | 66  | Cl | -0.710323 | -4.309732 | 0.272606  |
| 14 | H  | 6.151697  | 0.166458  | -1.734642 | 67  | H  | 2.681294  | -4.107397 | 0.408637  |
| 15 | H  | 4.103200  | -3.430988 | -2.941229 | 68  | H  | -1.486408 | -5.002926 | -0.030476 |
| 16 | H  | 6.188439  | -2.175497 | -2.556991 | 69  | C  | -2.312610 | -2.411602 | 0.992998  |
| 17 | C  | -2.251233 | 2.320776  | -1.004223 | 70  | C  | -3.651490 | -0.782393 | 1.586199  |
| 18 | C  | -4.346945 | 1.732780  | -1.333329 | 71  | C  | -4.439123 | -1.864475 | 1.156553  |
| 19 | C  | -3.506858 | 0.666351  | -1.698826 | 72  | C  | -4.240330 | 0.405871  | 2.029908  |
| 20 | C  | -5.736415 | 1.642028  | -1.412562 | 73  | C  | -5.831936 | -1.798723 | 1.123631  |
| 21 | C  | -4.036280 | -0.530573 | -2.191103 | 74  | C  | -5.622759 | 0.465359  | 2.009857  |
| 22 | C  | -6.250858 | 0.449780  | -1.891589 | 75  | H  | -3.629646 | 1.234573  | 2.381708  |
| 23 | H  | -6.382876 | 2.462066  | -1.111067 | 76  | C  | -6.405139 | -0.615533 | 1.556641  |
| 24 | C  | -5.414517 | -0.614772 | -2.282009 | 77  | H  | -6.437567 | -2.629740 | 0.771778  |
| 25 | H  | -3.384257 | -1.347531 | -2.492814 | 78  | H  | -6.118299 | 1.370020  | 2.357775  |
| 26 | H  | -7.328332 | 0.330915  | -1.970094 | 79  | H  | -7.487454 | -0.516970 | 1.547508  |
| 27 | H  | -5.864308 | -1.526140 | -2.671517 | 80  | C  | 2.158363  | -1.425588 | 1.388578  |
| 28 | C  | 1.352017  | 2.567786  | -0.817137 | 81  | C  | 3.805043  | -0.040040 | 1.852127  |
| 29 | C  | -0.987109 | 2.987824  | -0.696333 | 82  | C  | 2.578216  | 0.604422  | 2.092511  |
| 30 | N  | 1.734506  | 0.327235  | -1.614179 | 83  | C  | 5.029272  | 0.595528  | 2.059178  |
| 31 | N  | -2.207221 | 1.065552  | -1.482824 | 84  | C  | 2.535715  | 1.929636  | 2.536312  |
| 32 | Pt | -0.304015 | 0.358901  | -1.638066 | 85  | C  | 4.975779  | 1.905204  | 2.505910  |
| 33 | H  | 0.758835  | 5.646522  | 0.432278  | 86  | H  | 5.975965  | 0.091123  | 1.883187  |
| 34 | N  | 3.618129  | 1.448182  | -1.223579 | 87  | C  | 3.750298  | 2.562687  | 2.735486  |
| 35 | N  | -3.525242 | 2.772244  | -0.930167 | 88  | H  | 1.584088  | 2.424661  | 2.712701  |
| 36 | C  | -4.016459 | 4.008720  | -0.316942 | 89  | H  | 5.904101  | 2.442699  | 2.680382  |
| 37 | H  | -3.365433 | 4.834569  | -0.619443 | 90  | H  | 3.762100  | 3.593461  | 3.080182  |
| 38 | H  | -4.996884 | 4.216554  | -0.757370 | 91  | C  | -1.013530 | -3.045943 | 0.770083  |
| 39 | C  | 4.574044  | 2.520274  | -0.940414 | 92  | C  | 1.301616  | -2.538307 | 0.982498  |
| 40 | H  | 4.249118  | 3.052546  | -0.039888 | 93  | N  | -2.331476 | -1.156344 | 1.474277  |
| 41 | H  | 5.521580  | 2.036845  | -0.678656 | 94  | N  | 1.571818  | -0.289631 | 1.803964  |
| 42 | C  | 4.747380  | 3.442333  | -2.133365 | 95  | Pt | -0.462473 | -0.393346 | 1.738197  |
| 43 | H  | 5.136502  | 2.864170  | -2.982104 | 96  | H  | 0.875612  | -5.658788 | -0.229460 |
| 44 | H  | 3.771334  | 3.849622  | -2.432258 | 97  | N  | -3.568445 | -2.887434 | 0.818282  |
| 45 | C  | 5.690736  | 4.574643  | -1.788348 | 98  | N  | 3.506574  | -1.315386 | 1.404771  |
| 46 | H  | 5.308138  | 5.168977  | -0.948318 | 99  | C  | 4.509890  | -2.320282 | 1.052438  |
| 47 | H  | 6.685577  | 4.202516  | -1.514442 | 100 | H  | 4.165284  | -2.851549 | 0.158432  |
| 48 | C  | -4.105081 | 3.836177  | 1.186792  | 101 | H  | 5.410888  | -1.775818 | 0.748960  |
| 49 | H  | -4.832752 | 3.041705  | 1.402529  | 102 | C  | -3.989878 | -4.125696 | 0.159248  |
| 50 | H  | -3.132341 | 3.494816  | 1.570451  | 103 | H  | -3.363576 | -4.949312 | 0.512907  |
| 51 | C  | -4.513041 | 5.107623  | 1.894655  | 104 | H  | -5.003619 | -4.344115 | 0.509407  |
| 52 | H  | -5.443482 | 5.525244  | 1.490695  | 105 | C  | -3.946640 | -3.946727 | -1.345640 |
| 53 | H  | -3.734432 | 5.877958  | 1.828984  | 106 | H  | -4.663892 | -3.162447 | -1.620539 |

|     |    |           |           |           |
|-----|----|-----------|-----------|-----------|
| 107 | H  | -2.948411 | -3.589811 | -1.640854 |
| 108 | C  | -4.274132 | -5.219838 | -2.091242 |
| 109 | H  | -3.528760 | -6.003846 | -1.906995 |
| 110 | H  | -5.260296 | -5.614005 | -1.816420 |
| 111 | C  | 4.797513  | -3.260908 | 2.207199  |
| 112 | H  | 5.208651  | -2.688483 | 3.049280  |
| 113 | H  | 3.860964  | -3.723263 | 2.549304  |
| 114 | C  | 5.769057  | -4.338637 | 1.773524  |
| 115 | H  | 6.735449  | -3.916118 | 1.472188  |
| 116 | H  | 5.371513  | -4.913211 | 0.926558  |
| 117 | N  | -0.004941 | -2.213387 | 1.109027  |
| 118 | S  | 6.101940  | -5.520605 | 3.076924  |
| 119 | S  | -4.309869 | -4.934329 | -3.860370 |
| 120 | O  | 4.790023  | -6.130430 | 3.413086  |
| 121 | O  | 6.679841  | -4.738818 | 4.199250  |
| 122 | O  | 7.059575  | -6.488229 | 2.486782  |
| 123 | O  | -2.956064 | -4.439136 | -4.220529 |
| 124 | O  | -5.371457 | -3.918049 | -4.083156 |
| 125 | O  | -4.629489 | -6.250879 | -4.464120 |
| 126 | Cl | -1.006926 | 1.763984  | 2.510849  |

**Table S6.** Cartesian coordinates of the optimized ground-state geometry of the trimer of PtB at the M06 level.

|    |    |           |           |           |     |    |           |           |           |
|----|----|-----------|-----------|-----------|-----|----|-----------|-----------|-----------|
| 1  | C  | 2.130232  | 2.441460  | -2.942008 | 54  | N  | 0.471370  | 1.498512  | -1.541502 |
| 2  | C  | 1.195406  | 3.392180  | -3.343021 | 55  | S  | 6.689526  | 1.021329  | -5.794034 |
| 3  | C  | -0.096516 | 3.394074  | -2.832973 | 56  | S  | -2.631186 | 7.901560  | -0.967904 |
| 4  | H  | 3.132411  | 2.454563  | -3.357819 | 57  | O  | 5.468280  | 1.316730  | -6.586829 |
| 5  | H  | -0.797683 | 4.160843  | -3.142506 | 58  | O  | 7.065731  | -0.415969 | -5.825958 |
| 6  | C  | -1.730666 | 2.157996  | -1.250180 | 59  | O  | 7.820799  | 1.925780  | -6.115372 |
| 7  | C  | -3.082985 | 1.118504  | 0.124100  | 60  | O  | -1.206618 | 7.716973  | -0.587863 |
| 8  | C  | -3.801377 | 2.155578  | -0.496743 | 61  | O  | -3.549792 | 7.819600  | 0.198132  |
| 9  | C  | -3.694814 | 0.272321  | 1.054971  | 62  | O  | -2.860223 | 9.104620  | -1.804660 |
| 10 | C  | -5.136859 | 2.417375  | -0.186548 | 63  | Cl | -0.650800 | -1.455344 | 1.429234  |
| 11 | C  | -5.021999 | 0.526336  | 1.354167  | 64  | C  | -2.348096 | -4.147126 | -0.049433 |
| 12 | H  | -3.139946 | -0.542871 | 1.515701  | 65  | C  | -1.151341 | -4.848562 | 0.046890  |
| 13 | C  | -5.728128 | 1.586137  | 0.750041  | 66  | C  | -0.071036 | -4.551716 | -0.779342 |
| 14 | H  | -5.685729 | 3.232184  | -0.652089 | 67  | H  | -3.176879 | -4.396807 | 0.603747  |
| 15 | H  | -5.533143 | -0.111780 | 2.074457  | 68  | H  | 0.862533  | -5.095998 | -0.679417 |
| 16 | H  | -6.767750 | 1.750661  | 1.022045  | 69  | C  | 0.732393  | -3.030121 | -2.700497 |
| 17 | C  | 2.521508  | 0.426197  | -1.371946 | 70  | C  | 1.471739  | -1.635088 | -4.214394 |
| 18 | C  | 4.070057  | -0.947537 | -0.622343 | 71  | C  | 2.411415  | -2.671603 | -4.074497 |
| 19 | C  | 2.838084  | -1.269967 | -0.024903 | 72  | C  | 1.671291  | -0.600742 | -5.134083 |
| 20 | C  | 5.244584  | -1.634578 | -0.313702 | 73  | C  | 3.572140  | -2.729399 | -4.844726 |
| 21 | C  | 2.742511  | -2.287826 | 0.929554  | 74  | C  | 2.818905  | -0.663664 | -5.905001 |
| 22 | C  | 5.140163  | -2.640190 | 0.633450  | 75  | H  | 0.942639  | 0.200304  | -5.233747 |
| 23 | H  | 6.192065  | -1.393670 | -0.789949 | 76  | C  | 3.753097  | -1.709880 | -5.763869 |
| 24 | C  | 3.912329  | -2.953494 | 1.251960  | 77  | H  | 4.295839  | -3.531987 | -4.728454 |
| 25 | H  | 1.787465  | -2.525147 | 1.392820  | 78  | H  | 3.021816  | 0.122740  | -6.627421 |
| 26 | H  | 6.025775  | -3.209195 | 0.903381  | 79  | H  | 4.651942  | -1.698562 | -6.375642 |
| 27 | H  | 3.885452  | -3.752278 | 1.988534  | 80  | C  | -3.559554 | -2.227768 | -1.291734 |
| 28 | C  | -0.453610 | 2.403295  | -1.922495 | 81  | C  | -5.507980 | -1.230191 | -1.505206 |
| 29 | C  | 1.743260  | 1.492974  | -2.001211 | 82  | C  | -4.603397 | -0.675634 | -2.428561 |
| 30 | N  | -1.796957 | 1.153475  | -0.361267 | 83  | C  | -6.833134 | -0.803224 | -1.420470 |
| 31 | N  | 1.893931  | -0.398372 | -0.516890 | 84  | C  | -4.997510 | 0.347664  | -3.296771 |
| 32 | Pt | -0.047360 | 0.133865  | -0.205616 | 85  | C  | -7.214765 | 0.204498  | -2.289155 |
| 33 | H  | 1.483969  | 4.150174  | -4.064313 | 86  | H  | -7.529216 | -1.240575 | -0.709084 |
| 34 | N  | -2.931102 | 2.771628  | -1.380686 | 87  | C  | -6.310347 | 0.774805  | -3.207838 |
| 35 | N  | 3.840305  | 0.130073  | -1.462278 | 88  | H  | -4.290223 | 0.777132  | -4.001906 |
| 36 | C  | 4.908949  | 0.902024  | -2.098935 | 89  | H  | -8.238394 | 0.568432  | -2.260873 |
| 37 | H  | 4.660393  | 1.966941  | -2.010049 | 90  | H  | -6.657633 | 1.567263  | -3.865908 |
| 38 | H  | 5.804175  | 0.748156  | -1.485817 | 91  | C  | -0.220667 | -3.537015 | -1.717019 |
| 39 | C  | -3.245761 | 3.996772  | -2.114932 | 92  | C  | -2.441305 | -3.117257 | -0.980449 |
| 40 | H  | -2.745164 | 3.965136  | -3.087788 | 93  | N  | 0.426028  | -1.899551 | -3.358557 |
| 41 | H  | -4.320699 | 3.976499  | -2.326119 | 94  | N  | -3.398344 | -1.323064 | -2.273660 |
| 42 | C  | -2.853875 | 5.201942  | -1.281247 | 95  | Pt | -1.498715 | -1.307999 | -3.007008 |
| 43 | H  | -3.457873 | 5.199549  | -0.363757 | 96  | H  | -1.058362 | -5.641843 | 0.782140  |
| 44 | H  | -1.801593 | 5.097787  | -0.974250 | 97  | N  | 1.911908  | -3.543049 | -3.119059 |
| 45 | C  | -3.045005 | 6.508016  | -2.016813 | 98  | N  | -4.816558 | -2.194661 | -0.794870 |
| 46 | H  | -2.401712 | 6.574047  | -2.903642 | 99  | C  | -5.348687 | -2.916015 | 0.362946  |
| 47 | H  | -4.084279 | 6.651452  | -2.336924 | 100 | H  | -4.555991 | -2.997832 | 1.117548  |
| 48 | C  | 5.179436  | 0.500929  | -3.533391 | 101 | H  | -6.117683 | -2.272767 | 0.805935  |
| 49 | H  | 5.477512  | -0.556139 | -3.569063 | 102 | C  | 2.492049  | -4.860775 | -2.847296 |
| 50 | H  | 4.263887  | 0.598916  | -4.134396 | 103 | H  | 1.679007  | -5.543719 | -2.579090 |
| 51 | C  | 6.277899  | 1.384448  | -4.089295 | 104 | H  | 2.890670  | -5.219814 | -3.803784 |
| 52 | H  | 7.206487  | 1.271932  | -3.515025 | 105 | C  | 3.581555  | -4.841048 | -1.793288 |
| 53 | H  | 5.990572  | 2.444415  | -4.056505 | 106 | H  | 4.342400  | -4.093991 | -2.061146 |



|     |    |           |           |           |     |    |           |           |          |
|-----|----|-----------|-----------|-----------|-----|----|-----------|-----------|----------|
| 107 | H  | 3.161103  | -4.545145 | -0.821582 | 160 | N  | 4.874416  | 1.161210  | 2.025292 |
| 108 | C  | 4.199890  | -6.223040 | -1.711695 | 161 | N  | -2.024534 | 1.457185  | 4.288986 |
| 109 | H  | 3.460021  | -6.972818 | -1.403980 | 162 | C  | -2.564956 | 0.420377  | 5.173146 |
| 110 | H  | 4.602302  | -6.530166 | -2.685340 | 163 | H  | -1.796107 | 0.128867  | 5.894368 |
| 111 | C  | -5.928753 | -4.267910 | -0.011244 | 164 | H  | -3.366700 | 0.885711  | 5.755625 |
| 112 | H  | -6.797235 | -4.125684 | -0.668247 | 165 | C  | 5.794335  | 0.195761  | 2.628272 |
| 113 | H  | -5.188064 | -4.852776 | -0.574244 | 166 | H  | 5.289668  | -0.774940 | 2.686668 |
| 114 | C  | -6.330994 | -5.023790 | 1.238830  | 167 | H  | 6.619481  | 0.060481  | 1.920110 |
| 115 | H  | -7.076253 | -4.471939 | 1.825369  | 168 | C  | 6.300921  | 0.673721  | 3.976882 |
| 116 | H  | -5.463883 | -5.209274 | 1.887490  | 169 | H  | 6.880837  | 1.596250  | 3.840367 |
| 117 | N  | -1.383487 | -2.852846 | -1.776511 | 170 | H  | 5.449071  | 0.914730  | 4.627937 |
| 118 | S  | -7.045108 | -6.622999 | 0.869337  | 171 | C  | 7.151961  | -0.396434 | 4.627281 |
| 119 | S  | 5.561498  | -6.350462 | -0.556358 | 172 | H  | 6.574993  | -1.315964 | 4.791087 |
| 120 | O  | -5.998798 | -7.374734 | 0.130124  | 173 | H  | 8.024859  | -0.650040 | 4.013203 |
| 121 | O  | -8.250990 | -6.352732 | 0.045298  | 174 | C  | -3.077884 | -0.741846 | 4.345039 |
| 122 | O  | -7.365837 | -7.217765 | 2.190513  | 175 | H  | -3.901514 | -0.375247 | 3.717727 |
| 123 | O  | 4.996957  | -6.068660 | 0.788452  | 176 | H  | -2.280130 | -1.081744 | 3.668356 |
| 124 | O  | 6.561584  | -5.341730 | -0.991033 | 177 | C  | -3.561994 | -1.895961 | 5.194171 |
| 125 | O  | 6.045405  | -7.746741 | -0.697109 | 178 | H  | -4.285613 | -1.573574 | 5.953132 |
| 126 | Cl | -1.648323 | 0.536027  | -4.468600 | 179 | H  | -2.734702 | -2.405635 | 5.703170 |
| 127 | C  | 0.575559  | -0.435320 | 4.676359  | 180 | N  | 1.414800  | 1.158753  | 3.144061 |
| 128 | C  | 1.836740  | -1.017281 | 4.710095  | 181 | S  | -4.401908 | -3.119589 | 4.187112 |
| 129 | C  | 2.889248  | -0.502482 | 3.960650  | 182 | S  | 7.776773  | 0.103659  | 6.228540 |
| 130 | H  | -0.234508 | -0.869022 | 5.250883  | 183 | O  | -3.425452 | -3.521352 | 3.136495 |
| 131 | H  | 3.867549  | -0.966379 | 4.015350  | 184 | O  | -5.595362 | -2.429889 | 3.628727 |
| 132 | C  | 3.551071  | 1.323570  | 2.254199  | 185 | O  | -4.750958 | -4.229857 | 5.104782 |
| 133 | C  | 4.096799  | 2.876142  | 0.810139  | 186 | O  | 6.579221  | 0.376663  | 7.063628 |
| 134 | C  | 5.254495  | 2.141577  | 1.124341  | 187 | O  | 8.599938  | 1.315433  | 5.985664 |
| 135 | C  | 4.142395  | 3.938037  | -0.098945 | 188 | O  | 8.570571  | -1.053757 | 6.710115 |
| 136 | C  | 6.499056  | 2.450463  | 0.574162  | 189 | Cl | 0.685138  | 4.512049  | 0.495750 |
| 137 | C  | 5.375457  | 4.236585  | -0.653566 |     |    |           |           |          |
| 138 | H  | 3.243565  | 4.500211  | -0.339038 |     |    |           |           |          |
| 139 | C  | 6.534836  | 3.508069  | -0.319284 |     |    |           |           |          |
| 140 | H  | 7.394955  | 1.892246  | 0.833433  |     |    |           |           |          |
| 141 | H  | 5.455054  | 5.057392  | -1.361615 |     |    |           |           |          |
| 142 | H  | 7.482183  | 3.784727  | -0.774508 |     |    |           |           |          |
| 143 | C  | -0.812981 | 1.507585  | 3.685717  |     |    |           |           |          |
| 144 | C  | -2.792946 | 2.469174  | 3.736217  |     |    |           |           |          |
| 145 | C  | -1.973807 | 3.150768  | 2.819131  |     |    |           |           |          |
| 146 | C  | -4.117693 | 2.841813  | 3.963414  |     |    |           |           |          |
| 147 | C  | -2.450459 | 4.259342  | 2.112052  |     |    |           |           |          |
| 148 | C  | -4.582673 | 3.935568  | 3.253754  |     |    |           |           |          |
| 149 | H  | -4.755166 | 2.299647  | 4.656759  |     |    |           |           |          |
| 150 | C  | -3.760636 | 4.636532  | 2.348824  |     |    |           |           |          |
| 151 | H  | -1.809092 | 4.796242  | 1.416073  |     |    |           |           |          |
| 152 | H  | -5.609152 | 4.262697  | 3.397129  |     |    |           |           |          |
| 153 | H  | -4.164827 | 5.500640  | 1.824842  |     |    |           |           |          |
| 154 | C  | 2.647892  | 0.603641  | 3.152249  |     |    |           |           |          |
| 155 | C  | 0.383312  | 0.689488  | 3.880614  |     |    |           |           |          |
| 156 | N  | 3.053949  | 2.346824  | 1.537371  |     |    |           |           |          |
| 157 | N  | -0.746727 | 2.527744  | 2.812772  |     |    |           |           |          |
| 158 | Pt | 1.081664  | 2.688606  | 1.932557  |     |    |           |           |          |
| 159 | H  | 2.004102  | -1.890649 | 5.332427  |     |    |           |           |          |

**Table S7.** Force field parameters of PtB-core system in GROMACS format used in this work.

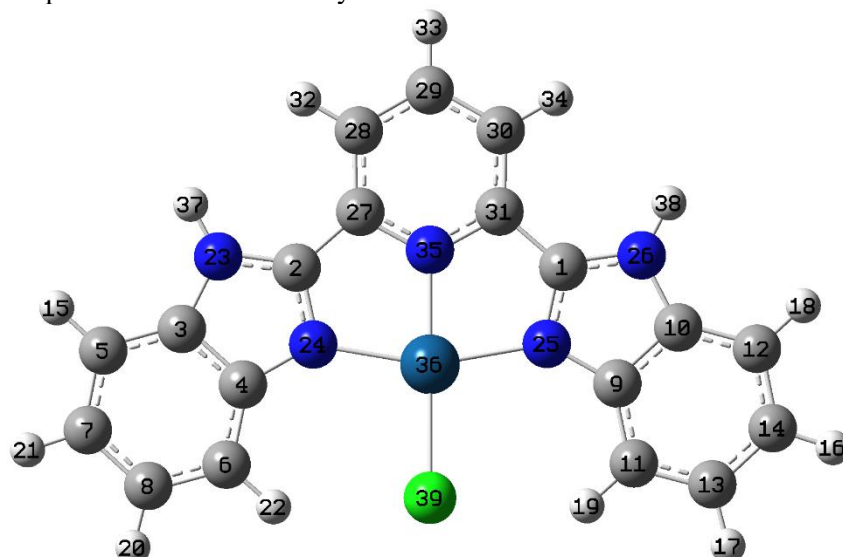

**; PtB-core force field parameters**  
**;PtB-core\_GMX.top**

```
[ defaults ]
; nbfunc      comb-rule   gen-pairs   fudgeLJ    fudgeQQ
1             2           yes         0.5        0.8333

[ atomtypes ]
; name      at.num  mass      charge  ptype  sigma      epsilon
PTBc_cc    6      12.01     0.0000  A      3.39967e-01  3.59824e-01
PTBc_ca    6      12.01     0.0000  A      3.39967e-01  3.59824e-01
PTBc_ha    1      1.008     0.0000  A      2.59964e-01  6.27600e-02
PTBc_na    7      14.01     0.0000  A      3.25000e-01  7.11280e-01
PTBc_nd    7      14.01     0.0000  A      3.25000e-01  7.11280e-01
PTBc_nb    7      14.01     0.0000  A      3.25000e-01  7.11280e-01
PTBc_Pt    78     195.078   0.0000  A      3.3298e-01   1.0534e+01
PTBc_hn    1      1.008     0.0000  A      1.06908e-01  6.56888e-02
PTBc_cl    17     35.45     0.0000  A      3.47094e-01  1.10876e+00

[ moleculetype ]
; Name      nrexcl
PTB-core    3

[ atoms ]
; nr  type  resnr  residue  atom  cgnr  charge  mass  typeB  chargeB  massB
; residue 1 PTP rtp PTP q +1.0
1  PTBc_cc  1  PTP  C1  1  0.081892  12.01 ; qtot 0.08189
2  PTBc_cc  1  PTP  C2  2  0.081892  12.01 ; qtot 0.1638
3  PTBc_ca  1  PTP  C3  3  0.250779  12.01 ; qtot 0.4146
4  PTBc_ca  1  PTP  C4  4  0.148116  12.01 ; qtot 0.5627
5  PTBc_ca  1  PTP  C5  5 -0.280998  12.01 ; qtot 0.2817
6  PTBc_ca  1  PTP  C6  6 -0.217522  12.01 ; qtot 0.06416
7  PTBc_ca  1  PTP  C7  7 -0.076146  12.01 ; qtot -0.01199
8  PTBc_ca  1  PTP  C8  8 -0.106842  12.01 ; qtot -0.1188
9  PTBc_ca  1  PTP  C9  9  0.148116  12.01 ; qtot 0.02929
10 PTBc_ca  1  PTP  C10 10 0.250779  12.01 ; qtot 0.2801
11 PTBc_ca  1  PTP  C11 11 -0.217522  12.01 ; qtot 0.06254
12 PTBc_ca  1  PTP  C12 12 -0.280998  12.01 ; qtot -0.2185
13 PTBc_ca  1  PTP  C13 13 -0.106842  12.01 ; qtot -0.3253
14 PTBc_ca  1  PTP  C14 14 -0.076146  12.01 ; qtot -0.4014
15 PTBc_ha  1  PTP  H1  15 0.184387  1.008 ; qtot -0.2171
16 PTBc_ha  1  PTP  H2  16 0.151311  1.008 ; qtot -0.06574
17 PTBc_ha  1  PTP  H3  17 0.153899  1.008 ; qtot 0.08816
18 PTBc_ha  1  PTP  H4  18 0.184387  1.008 ; qtot 0.2725
19 PTBc_ha  1  PTP  H5  19 0.1958  1.008 ; qtot 0.4683
20 PTBc_ha  1  PTP  H6  20 0.153899  1.008 ; qtot 0.6222
21 PTBc_ha  1  PTP  H7  21 0.151311  1.008 ; qtot 0.7736
22 PTBc_ha  1  PTP  H8  22 0.1958  1.008 ; qtot 0.9694
```

|    |         |   |     |     |    |           |         |                 |
|----|---------|---|-----|-----|----|-----------|---------|-----------------|
| 23 | PTBc_na | 1 | PTP | N1  | 23 | -0.408906 | 14.01   | ; qtot 0.5604   |
| 24 | PTBc_nd | 1 | PTP | N2  | 24 | 0.044289  | 14.01   | ; qtot 0.6047   |
| 25 | PTBc_nd | 1 | PTP | N3  | 25 | 0.044289  | 14.01   | ; qtot 0.649    |
| 26 | PTBc_na | 1 | PTP | N4  | 26 | -0.408906 | 14.01   | ; qtot 0.2401   |
| 27 | PTBc_ca | 1 | PTP | C15 | 27 | 0.250755  | 12.01   | ; qtot 0.4909   |
| 28 | PTBc_ca | 1 | PTP | C16 | 28 | -0.277609 | 12.01   | ; qtot 0.2133   |
| 29 | PTBc_ca | 1 | PTP | C17 | 29 | 0.006689  | 12.01   | ; qtot 0.22     |
| 30 | PTBc_ca | 1 | PTP | C18 | 30 | -0.277609 | 12.01   | ; qtot -0.05766 |
| 31 | PTBc_ca | 1 | PTP | C19 | 31 | 0.250755  | 12.01   | ; qtot 0.1931   |
| 32 | PTBc_ha | 1 | PTP | H9  | 32 | 0.183021  | 1.008   | ; qtot 0.3761   |
| 33 | PTBc_ha | 1 | PTP | H10 | 33 | 0.157288  | 1.008   | ; qtot 0.5334   |
| 34 | PTBc_ha | 1 | PTP | H11 | 34 | 0.183021  | 1.008   | ; qtot 0.7164   |
| 35 | PTBc_nb | 1 | PTP | N5  | 35 | -0.04731  | 14.01   | ; qtot 0.6691   |
| 36 | PTBc_Pt | 1 | PTP | PT1 | 36 | -0.201109 | 195.078 | ; qtot 0.468    |
| 37 | PTBc_hn | 1 | PTP | H12 | 37 | 0.386136  | 1.008   | ; qtot 0.8541   |
| 38 | PTBc_hn | 1 | PTP | H13 | 38 | 0.386136  | 1.008   | ; qtot 1.24     |
| 39 | PTBc_cl | 1 | PTP | CL1 | 39 | -0.240282 | 35.45   | ; qtot 1        |

[ bonds ]

| ; ai | aj | funct | c0      | c1       | c2 | c3 |
|------|----|-------|---------|----------|----|----|
| 1    | 25 | 1     | 0.13350 | 413880.0 |    |    |
| 1    | 26 | 1     | 0.13710 | 367190.0 |    |    |
| 1    | 31 | 1     | 0.14340 | 344510.0 |    |    |
| 2    | 23 | 1     | 0.13710 | 367190.0 |    |    |
| 2    | 24 | 1     | 0.13350 | 413880.0 |    |    |
| 2    | 27 | 1     | 0.14340 | 344510.0 |    |    |
| 3    | 4  | 1     | 0.13870 | 400330.0 |    |    |
| 3    | 5  | 1     | 0.13870 | 400330.0 |    |    |
| 3    | 23 | 1     | 0.13500 | 393550.0 |    |    |
| 4    | 6  | 1     | 0.13870 | 400330.0 |    |    |
| 4    | 24 | 1     | 0.13360 | 412460.0 |    |    |
| 5    | 7  | 1     | 0.13870 | 400330.0 |    |    |
| 5    | 15 | 1     | 0.10870 | 288110.0 |    |    |
| 6    | 8  | 1     | 0.13870 | 400330.0 |    |    |
| 6    | 22 | 1     | 0.10870 | 288110.0 |    |    |
| 7    | 8  | 1     | 0.13870 | 400330.0 |    |    |
| 7    | 21 | 1     | 0.10870 | 288110.0 |    |    |
| 8    | 20 | 1     | 0.10870 | 288110.0 |    |    |
| 9    | 10 | 1     | 0.13870 | 400330.0 |    |    |
| 9    | 11 | 1     | 0.13870 | 400330.0 |    |    |
| 9    | 25 | 1     | 0.13360 | 412460.0 |    |    |
| 10   | 12 | 1     | 0.13870 | 400330.0 |    |    |
| 10   | 26 | 1     | 0.13500 | 393550.0 |    |    |
| 11   | 13 | 1     | 0.13870 | 400330.0 |    |    |
| 11   | 19 | 1     | 0.10870 | 288110.0 |    |    |
| 12   | 14 | 1     | 0.13870 | 400330.0 |    |    |
| 12   | 18 | 1     | 0.10870 | 288110.0 |    |    |
| 13   | 14 | 1     | 0.13870 | 400330.0 |    |    |
| 13   | 17 | 1     | 0.10870 | 288110.0 |    |    |
| 14   | 16 | 1     | 0.10870 | 288110.0 |    |    |
| 23   | 37 | 1     | 0.10110 | 340240.0 |    |    |
| 24   | 36 | 1     | 0.20310 | 306270.0 |    |    |
| 25   | 36 | 1     | 0.20310 | 306270.0 |    |    |
| 26   | 38 | 1     | 0.10110 | 340240.0 |    |    |
| 27   | 28 | 1     | 0.13870 | 400330.0 |    |    |
| 27   | 35 | 1     | 0.13420 | 404260.0 |    |    |
| 28   | 29 | 1     | 0.13870 | 400330.0 |    |    |
| 28   | 32 | 1     | 0.10870 | 288110.0 |    |    |
| 29   | 30 | 1     | 0.13870 | 400330.0 |    |    |
| 29   | 33 | 1     | 0.10870 | 288110.0 |    |    |
| 30   | 31 | 1     | 0.13870 | 400330.0 |    |    |
| 30   | 34 | 1     | 0.10870 | 288110.0 |    |    |
| 31   | 35 | 1     | 0.13420 | 404260.0 |    |    |
| 35   | 36 | 1     | 0.19670 | 306270.0 |    |    |
| 36   | 39 | 1     | 0.22890 | 131440.0 |    |    |

[ pairs ]

| ; ai | aj | funct | c0 | c1 | c2 | c3 |
|------|----|-------|----|----|----|----|
| 1    | 11 | 1     |    |    |    |    |
| 1    | 12 | 1     |    |    |    |    |

1 24 1  
1 27 1  
1 29 1  
1 34 1  
1 39 1  
2 5 1  
2 6 1  
2 25 1  
2 29 1  
2 31 1  
2 32 1  
2 39 1  
3 8 1  
3 21 1  
3 22 1  
3 27 1  
3 36 1  
4 7 1  
4 15 1  
4 20 1  
4 25 1  
4 27 1  
4 35 1  
4 37 1  
4 39 1  
5 6 1  
5 20 1  
5 24 1  
5 37 1  
6 21 1  
6 23 1  
6 36 1  
7 22 1  
7 23 1  
8 15 1  
8 24 1  
9 14 1  
9 17 1  
9 18 1  
9 24 1  
9 31 1  
9 35 1  
9 38 1  
9 39 1  
10 13 1  
10 16 1  
10 19 1  
10 31 1  
10 36 1  
11 12 1  
11 16 1  
11 26 1  
11 36 1  
12 17 1  
12 25 1  
12 38 1  
13 18 1  
13 25 1  
14 19 1  
14 26 1  
15 21 1  
15 23 1  
16 17 1  
16 18 1  
17 19 1  
18 26 1  
19 25 1  
20 21 1  
20 22 1  
22 24 1

23 28 1  
 23 35 1  
 23 36 1  
 24 28 1  
 24 31 1  
 24 37 1  
 25 27 1  
 25 30 1  
 25 38 1  
 26 30 1  
 26 35 1  
 26 36 1  
 27 30 1  
 27 33 1  
 27 37 1  
 27 39 1  
 28 31 1  
 28 34 1  
 28 36 1  
 29 35 1  
 30 32 1  
 30 36 1  
 31 33 1  
 31 38 1  
 31 39 1  
 32 33 1  
 32 35 1  
 33 34 1  
 34 35 1

[ angles ]

| ; ai | aj | ak | funct | c0       | c1       | c2 | c3 |
|------|----|----|-------|----------|----------|----|----|
| 25   | 1  | 26 | 1     | 112.0200 | 625.7600 |    |    |
| 25   | 1  | 31 | 1     | 123.2800 | 567.6900 |    |    |
| 26   | 1  | 31 | 1     | 113.6100 | 570.7500 |    |    |
| 23   | 2  | 24 | 1     | 112.0200 | 625.7600 |    |    |
| 23   | 2  | 27 | 1     | 113.6100 | 570.7500 |    |    |
| 24   | 2  | 27 | 1     | 123.2800 | 567.6900 |    |    |
| 4    | 3  | 5  | 1     | 119.9700 | 562.1600 |    |    |
| 4    | 3  | 23 | 1     | 118.3400 | 587.5200 |    |    |
| 5    | 3  | 23 | 1     | 118.3400 | 587.5200 |    |    |
| 3    | 4  | 6  | 1     | 119.9700 | 562.1600 |    |    |
| 3    | 4  | 24 | 1     | 119.7200 | 586.9300 |    |    |
| 6    | 4  | 24 | 1     | 119.7200 | 586.9300 |    |    |
| 3    | 5  | 7  | 1     | 119.9700 | 562.1600 |    |    |
| 3    | 5  | 15 | 1     | 120.0100 | 405.5100 |    |    |
| 7    | 5  | 15 | 1     | 120.0100 | 405.5100 |    |    |
| 4    | 6  | 8  | 1     | 119.9700 | 562.1600 |    |    |
| 4    | 6  | 22 | 1     | 120.0100 | 405.5100 |    |    |
| 8    | 6  | 22 | 1     | 120.0100 | 405.5100 |    |    |
| 5    | 7  | 8  | 1     | 119.9700 | 562.1600 |    |    |
| 5    | 7  | 21 | 1     | 120.0100 | 405.5100 |    |    |
| 8    | 7  | 21 | 1     | 120.0100 | 405.5100 |    |    |
| 6    | 8  | 7  | 1     | 119.9700 | 562.1600 |    |    |
| 6    | 8  | 20 | 1     | 120.0100 | 405.5100 |    |    |
| 7    | 8  | 20 | 1     | 120.0100 | 405.5100 |    |    |
| 10   | 9  | 11 | 1     | 119.9700 | 562.1600 |    |    |
| 10   | 9  | 25 | 1     | 119.7200 | 586.9300 |    |    |
| 11   | 9  | 25 | 1     | 119.7200 | 586.9300 |    |    |
| 9    | 10 | 12 | 1     | 119.9700 | 562.1600 |    |    |
| 9    | 10 | 26 | 1     | 118.3400 | 587.5200 |    |    |
| 12   | 10 | 26 | 1     | 118.3400 | 587.5200 |    |    |
| 9    | 11 | 13 | 1     | 119.9700 | 562.1600 |    |    |
| 9    | 11 | 19 | 1     | 120.0100 | 405.5100 |    |    |
| 13   | 11 | 19 | 1     | 120.0100 | 405.5100 |    |    |
| 10   | 12 | 14 | 1     | 119.9700 | 562.1600 |    |    |
| 10   | 12 | 18 | 1     | 120.0100 | 405.5100 |    |    |
| 14   | 12 | 18 | 1     | 120.0100 | 405.5100 |    |    |
| 11   | 13 | 14 | 1     | 119.9700 | 562.1600 |    |    |
| 11   | 13 | 17 | 1     | 120.0100 | 405.5100 |    |    |

|    |    |    |   |          |          |
|----|----|----|---|----------|----------|
| 14 | 13 | 17 | 1 | 120.0100 | 405.5100 |
| 12 | 14 | 13 | 1 | 119.9700 | 562.1600 |
| 12 | 14 | 16 | 1 | 120.0100 | 405.5100 |
| 13 | 14 | 16 | 1 | 120.0100 | 405.5100 |
| 2  | 23 | 3  | 1 | 113.1500 | 572.8700 |
| 2  | 23 | 37 | 1 | 125.6600 | 393.2100 |
| 3  | 23 | 37 | 1 | 125.5900 | 398.5700 |
| 2  | 24 | 4  | 1 | 105.4700 | 604.5000 |
| 2  | 24 | 36 | 1 | 111.7800 | 167.3600 |
| 4  | 24 | 36 | 1 | 140.9600 | 167.3600 |
| 1  | 25 | 9  | 1 | 105.4700 | 604.5000 |
| 1  | 25 | 36 | 1 | 111.7800 | 167.3600 |
| 9  | 25 | 36 | 1 | 140.9600 | 167.3600 |
| 1  | 26 | 10 | 1 | 113.1500 | 572.8700 |
| 1  | 26 | 38 | 1 | 125.6600 | 393.2100 |
| 10 | 26 | 38 | 1 | 125.5900 | 398.5700 |
| 2  | 27 | 28 | 1 | 120.1000 | 552.2000 |
| 2  | 27 | 35 | 1 | 118.4500 | 577.8900 |
| 28 | 27 | 35 | 1 | 122.6300 | 578.7300 |
| 27 | 28 | 29 | 1 | 119.9700 | 562.1600 |
| 27 | 28 | 32 | 1 | 120.0100 | 405.5100 |
| 29 | 28 | 32 | 1 | 120.0100 | 405.5100 |
| 28 | 29 | 30 | 1 | 119.9700 | 562.1600 |
| 28 | 29 | 33 | 1 | 120.0100 | 405.5100 |
| 30 | 29 | 33 | 1 | 119.9700 | 562.1600 |
| 29 | 30 | 31 | 1 | 119.9700 | 562.1600 |
| 29 | 30 | 34 | 1 | 120.0100 | 405.5100 |
| 31 | 30 | 34 | 1 | 120.0100 | 405.5100 |
| 1  | 31 | 30 | 1 | 120.1000 | 552.2000 |
| 1  | 31 | 35 | 1 | 118.4500 | 577.8900 |
| 30 | 31 | 35 | 1 | 122.6300 | 578.7300 |
| 27 | 35 | 31 | 1 | 115.8600 | 573.9600 |
| 27 | 35 | 36 | 1 | 118.7800 | 167.3600 |
| 31 | 35 | 36 | 1 | 118.7800 | 167.3600 |
| 24 | 36 | 25 | 1 | 160.3400 | 351.4600 |
| 24 | 36 | 35 | 1 | 80.1700  | 351.4600 |
| 24 | 36 | 39 | 1 | 99.8300  | 962.3200 |
| 25 | 36 | 35 | 1 | 80.1700  | 351.4600 |
| 25 | 36 | 39 | 1 | 99.8300  | 962.3200 |
| 35 | 36 | 39 | 1 | 180.0000 | 962.3200 |

[ dihedrals ]

| ; ai | aj | ak | al | funct | c0       | c1      | c2        | c3      | c4      | c5      |
|------|----|----|----|-------|----------|---------|-----------|---------|---------|---------|
| 26   | 1  | 25 | 9  | 3     | 39.74800 | 0.00000 | -39.74800 | 0.00000 | 0.00000 | 0.00000 |
| 26   | 1  | 25 | 36 | 3     | 39.74800 | 0.00000 | -39.74800 | 0.00000 | 0.00000 | 0.00000 |
| 31   | 1  | 25 | 9  | 3     | 39.74800 | 0.00000 | -39.74800 | 0.00000 | 0.00000 | 0.00000 |
| 31   | 1  | 25 | 36 | 3     | 39.74800 | 0.00000 | -39.74800 | 0.00000 | 0.00000 | 0.00000 |
| 25   | 1  | 26 | 10 | 3     | 14.22560 | 0.00000 | -14.22560 | 0.00000 | 0.00000 | 0.00000 |
| 25   | 1  | 26 | 38 | 3     | 14.22560 | 0.00000 | -14.22560 | 0.00000 | 0.00000 | 0.00000 |
| 31   | 1  | 26 | 10 | 3     | 14.22560 | 0.00000 | -14.22560 | 0.00000 | 0.00000 | 0.00000 |
| 31   | 1  | 26 | 38 | 3     | 14.22560 | 0.00000 | -14.22560 | 0.00000 | 0.00000 | 0.00000 |
| 25   | 1  | 31 | 30 | 3     | 21.33840 | 0.00000 | -21.33840 | 0.00000 | 0.00000 | 0.00000 |
| 25   | 1  | 31 | 35 | 3     | 21.33840 | 0.00000 | -21.33840 | 0.00000 | 0.00000 | 0.00000 |
| 26   | 1  | 31 | 30 | 3     | 21.33840 | 0.00000 | -21.33840 | 0.00000 | 0.00000 | 0.00000 |
| 26   | 1  | 31 | 35 | 3     | 21.33840 | 0.00000 | -21.33840 | 0.00000 | 0.00000 | 0.00000 |
| 24   | 2  | 23 | 3  | 3     | 14.22560 | 0.00000 | -14.22560 | 0.00000 | 0.00000 | 0.00000 |
| 24   | 2  | 23 | 37 | 3     | 14.22560 | 0.00000 | -14.22560 | 0.00000 | 0.00000 | 0.00000 |
| 27   | 2  | 23 | 3  | 3     | 14.22560 | 0.00000 | -14.22560 | 0.00000 | 0.00000 | 0.00000 |
| 27   | 2  | 23 | 37 | 3     | 14.22560 | 0.00000 | -14.22560 | 0.00000 | 0.00000 | 0.00000 |
| 23   | 2  | 24 | 4  | 3     | 39.74800 | 0.00000 | -39.74800 | 0.00000 | 0.00000 | 0.00000 |
| 23   | 2  | 24 | 36 | 3     | 39.74800 | 0.00000 | -39.74800 | 0.00000 | 0.00000 | 0.00000 |
| 27   | 2  | 24 | 4  | 3     | 39.74800 | 0.00000 | -39.74800 | 0.00000 | 0.00000 | 0.00000 |
| 27   | 2  | 24 | 36 | 3     | 39.74800 | 0.00000 | -39.74800 | 0.00000 | 0.00000 | 0.00000 |
| 23   | 2  | 27 | 28 | 3     | 21.33840 | 0.00000 | -21.33840 | 0.00000 | 0.00000 | 0.00000 |
| 23   | 2  | 27 | 35 | 3     | 21.33840 | 0.00000 | -21.33840 | 0.00000 | 0.00000 | 0.00000 |
| 24   | 2  | 27 | 28 | 3     | 21.33840 | 0.00000 | -21.33840 | 0.00000 | 0.00000 | 0.00000 |
| 24   | 2  | 27 | 35 | 3     | 21.33840 | 0.00000 | -21.33840 | 0.00000 | 0.00000 | 0.00000 |
| 5    | 3  | 4  | 6  | 3     | 30.33400 | 0.00000 | -30.33400 | 0.00000 | 0.00000 | 0.00000 |
| 5    | 3  | 4  | 24 | 3     | 30.33400 | 0.00000 | -30.33400 | 0.00000 | 0.00000 | 0.00000 |
| 23   | 3  | 4  | 6  | 3     | 30.33400 | 0.00000 | -30.33400 | 0.00000 | 0.00000 | 0.00000 |



|    |    |    |    |   |          |         |           |         |         |         |
|----|----|----|----|---|----------|---------|-----------|---------|---------|---------|
| 9  | 25 | 36 | 35 | 3 | 0.69700  | 0.00000 | -0.79600  | 0.00000 | 0.00000 | 0.00000 |
| 9  | 25 | 36 | 39 | 3 | 0.69700  | 0.00000 | -0.79600  | 0.00000 | 0.00000 | 0.00000 |
| 2  | 27 | 28 | 29 | 3 | 30.33400 | 0.00000 | -30.33400 | 0.00000 | 0.00000 | 0.00000 |
| 2  | 27 | 28 | 32 | 3 | 30.33400 | 0.00000 | -30.33400 | 0.00000 | 0.00000 | 0.00000 |
| 35 | 27 | 28 | 29 | 3 | 30.33400 | 0.00000 | -30.33400 | 0.00000 | 0.00000 | 0.00000 |
| 35 | 27 | 28 | 32 | 3 | 30.33400 | 0.00000 | -30.33400 | 0.00000 | 0.00000 | 0.00000 |
| 2  | 27 | 35 | 31 | 3 | 40.16640 | 0.00000 | -40.16640 | 0.00000 | 0.00000 | 0.00000 |
| 2  | 27 | 35 | 36 | 3 | 40.16640 | 0.00000 | -40.16640 | 0.00000 | 0.00000 | 0.00000 |
| 28 | 27 | 35 | 31 | 3 | 40.16640 | 0.00000 | -40.16640 | 0.00000 | 0.00000 | 0.00000 |
| 28 | 27 | 35 | 36 | 3 | 40.16640 | 0.00000 | -40.16640 | 0.00000 | 0.00000 | 0.00000 |
| 27 | 28 | 29 | 30 | 3 | 30.33400 | 0.00000 | -30.33400 | 0.00000 | 0.00000 | 0.00000 |
| 27 | 28 | 29 | 33 | 3 | 30.33400 | 0.00000 | -30.33400 | 0.00000 | 0.00000 | 0.00000 |
| 32 | 28 | 29 | 30 | 3 | 30.33400 | 0.00000 | -30.33400 | 0.00000 | 0.00000 | 0.00000 |
| 32 | 28 | 29 | 33 | 3 | 30.33400 | 0.00000 | -30.33400 | 0.00000 | 0.00000 | 0.00000 |
| 28 | 29 | 30 | 31 | 3 | 30.33400 | 0.00000 | -30.33400 | 0.00000 | 0.00000 | 0.00000 |
| 28 | 29 | 30 | 34 | 3 | 30.33400 | 0.00000 | -30.33400 | 0.00000 | 0.00000 | 0.00000 |
| 33 | 29 | 30 | 31 | 3 | 30.33400 | 0.00000 | -30.33400 | 0.00000 | 0.00000 | 0.00000 |
| 33 | 29 | 30 | 34 | 3 | 30.33400 | 0.00000 | -30.33400 | 0.00000 | 0.00000 | 0.00000 |
| 29 | 30 | 31 | 1  | 3 | 30.33400 | 0.00000 | -30.33400 | 0.00000 | 0.00000 | 0.00000 |
| 29 | 30 | 31 | 35 | 3 | 30.33400 | 0.00000 | -30.33400 | 0.00000 | 0.00000 | 0.00000 |
| 34 | 30 | 31 | 1  | 3 | 30.33400 | 0.00000 | -30.33400 | 0.00000 | 0.00000 | 0.00000 |
| 34 | 30 | 31 | 35 | 3 | 30.33400 | 0.00000 | -30.33400 | 0.00000 | 0.00000 | 0.00000 |
| 1  | 31 | 35 | 27 | 3 | 40.16640 | 0.00000 | -40.16640 | 0.00000 | 0.00000 | 0.00000 |
| 1  | 31 | 35 | 36 | 3 | 40.16640 | 0.00000 | -40.16640 | 0.00000 | 0.00000 | 0.00000 |
| 30 | 31 | 35 | 27 | 3 | 40.16640 | 0.00000 | -40.16640 | 0.00000 | 0.00000 | 0.00000 |
| 30 | 31 | 35 | 36 | 3 | 40.16640 | 0.00000 | -40.16640 | 0.00000 | 0.00000 | 0.00000 |
| 27 | 35 | 36 | 24 | 3 | 0.69700  | 0.00000 | -0.79600  | 0.00000 | 0.00000 | 0.00000 |
| 27 | 35 | 36 | 25 | 3 | 0.69700  | 0.00000 | -0.79600  | 0.00000 | 0.00000 | 0.00000 |
| 27 | 35 | 36 | 39 | 3 | 0.69700  | 0.00000 | -0.79600  | 0.00000 | 0.00000 | 0.00000 |
| 31 | 35 | 36 | 24 | 3 | 0.69700  | 0.00000 | -0.79600  | 0.00000 | 0.00000 | 0.00000 |
| 31 | 35 | 36 | 25 | 3 | 0.69700  | 0.00000 | -0.79600  | 0.00000 | 0.00000 | 0.00000 |
| 31 | 35 | 36 | 39 | 3 | 0.69700  | 0.00000 | -0.79600  | 0.00000 | 0.00000 | 0.00000 |

[ dihedrals ]

| ; ai | aj | ak | al | func | c0     | c1      | c2 | c3 |
|------|----|----|----|------|--------|---------|----|----|
| 3    | 7  | 5  | 15 | 1    | 180.00 | 4.60240 | 2  |    |
| 3    | 6  | 4  | 24 | 1    | 180.00 | 4.60240 | 2  |    |
| 3    | 2  | 23 | 37 | 1    | 180.00 | 4.60240 | 2  |    |
| 4    | 8  | 6  | 22 | 1    | 180.00 | 4.60240 | 2  |    |
| 4    | 5  | 3  | 23 | 1    | 180.00 | 4.60240 | 2  |    |
| 5    | 8  | 7  | 21 | 1    | 180.00 | 4.60240 | 2  |    |
| 6    | 7  | 8  | 20 | 1    | 180.00 | 4.60240 | 2  |    |
| 9    | 13 | 11 | 19 | 1    | 180.00 | 4.60240 | 2  |    |
| 9    | 12 | 10 | 26 | 1    | 180.00 | 4.60240 | 2  |    |
| 10   | 14 | 12 | 18 | 1    | 180.00 | 4.60240 | 2  |    |
| 10   | 11 | 9  | 25 | 1    | 180.00 | 4.60240 | 2  |    |
| 10   | 1  | 26 | 38 | 1    | 180.00 | 4.60240 | 2  |    |
| 11   | 14 | 13 | 17 | 1    | 180.00 | 4.60240 | 2  |    |
| 12   | 13 | 14 | 16 | 1    | 180.00 | 4.60240 | 2  |    |
| 24   | 2  | 23 | 27 | 1    | 180.00 | 4.60240 | 2  |    |
| 25   | 1  | 26 | 31 | 1    | 180.00 | 4.60240 | 2  |    |
| 27   | 29 | 28 | 32 | 1    | 180.00 | 4.60240 | 2  |    |
| 28   | 30 | 29 | 33 | 1    | 180.00 | 4.60240 | 2  |    |
| 28   | 2  | 27 | 35 | 1    | 180.00 | 4.60240 | 2  |    |
| 29   | 31 | 30 | 34 | 1    | 180.00 | 4.60240 | 2  |    |
| 30   | 1  | 31 | 35 | 1    | 180.00 | 4.60240 | 2  |    |

[ system ]

; Name

PtB-core

[ molecules ]

; Compound #mols

PTBc 1



**Table S8.** Force field parameters of PtB system in GROMACS format used in this work.

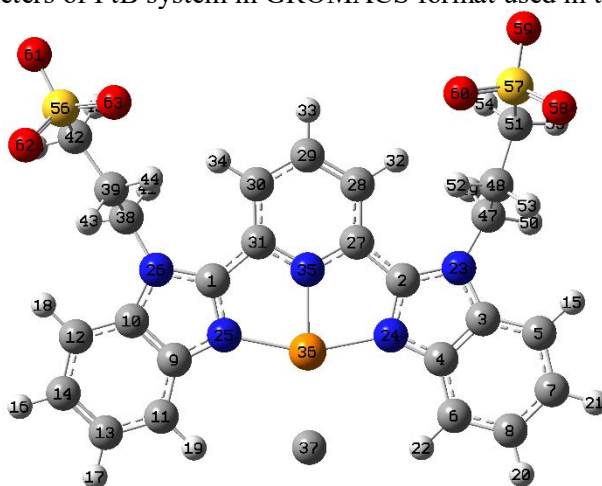

**; PtB force field parameters**

**;PtB\_GMX.top**

[ defaults ]

```
; nbfunc  comb-rule  gen-pairs  fudgeLJ  fudgeQQ
1          2          yes        0.5      0.8333
```

[ atomtypes ]

| ; name | at.num | mass    | charge | ptype | sigma       | epsilon     |
|--------|--------|---------|--------|-------|-------------|-------------|
| PTB_cc | 6      | 12.01   | 0.0000 | A     | 3.39967e-01 | 3.59824e-01 |
| PTB_ca | 6      | 12.01   | 0.0000 | A     | 3.39967e-01 | 3.59824e-01 |
| PTB_ha | 1      | 1.008   | 0.0000 | A     | 2.59964e-01 | 6.27600e-02 |
| PTB_na | 7      | 14.01   | 0.0000 | A     | 3.25000e-01 | 7.11280e-01 |
| PTB_nd | 7      | 14.01   | 0.0000 | A     | 3.25000e-01 | 7.11280e-01 |
| PTB_nb | 7      | 14.01   | 0.0000 | A     | 3.25000e-01 | 7.11280e-01 |
| PTB_Pt | 78     | 195.078 | 0.0000 | A     | 3.3298e-01  | 1.0534e+01  |
| PTB_cl | 17     | 35.45   | 0.0000 | A     | 3.47094e-01 | 1.10876e+00 |
| PTB_c3 | 6      | 12.01   | 0.0000 | A     | 3.39967e-01 | 4.57730e-01 |
| PTB_h1 | 1      | 1.008   | 0.0000 | A     | 2.47135e-01 | 6.56888e-02 |
| PTB_hc | 1      | 1.008   | 0.0000 | A     | 2.64953e-01 | 6.56888e-02 |
| PTB_s6 | 16     | 32.06   | 0.0000 | A     | 3.56359e-01 | 1.04600e+00 |
| PTB_o  | 8      | 16.00   | 0.0000 | A     | 2.95992e-01 | 8.78640e-01 |

[ moleculetype ]

```
; Name      nrexcl
PtB         3
```

[ atoms ]

| ; nr                           | type   | resnr | residue | atom | cgmr | charge    | mass  | typeB  | chargeB  | massB |
|--------------------------------|--------|-------|---------|------|------|-----------|-------|--------|----------|-------|
| ; residue 1 PTB rtp PTB q -1.0 |        |       |         |      |      |           |       |        |          |       |
| 1                              | PTB_cc | 1     | PTB     | C1   | 1    | 0.081892  | 12.01 | ; qtot | 0.08189  |       |
| 2                              | PTB_cc | 1     | PTB     | C2   | 2    | 0.081892  | 12.01 | ; qtot | 0.1638   |       |
| 3                              | PTB_ca | 1     | PTB     | C3   | 3    | 0.250779  | 12.01 | ; qtot | 0.4146   |       |
| 4                              | PTB_ca | 1     | PTB     | C4   | 4    | 0.148116  | 12.01 | ; qtot | 0.5627   |       |
| 5                              | PTB_ca | 1     | PTB     | C5   | 5    | -0.280998 | 12.01 | ; qtot | 0.2817   |       |
| 6                              | PTB_ca | 1     | PTB     | C6   | 6    | -0.217522 | 12.01 | ; qtot | 0.06416  |       |
| 7                              | PTB_ca | 1     | PTB     | C7   | 7    | -0.076146 | 12.01 | ; qtot | -0.01199 |       |
| 8                              | PTB_ca | 1     | PTB     | C8   | 8    | -0.106842 | 12.01 | ; qtot | -0.1188  |       |
| 9                              | PTB_ca | 1     | PTB     | C9   | 9    | 0.148116  | 12.01 | ; qtot | 0.02929  |       |
| 10                             | PTB_ca | 1     | PTB     | C10  | 10   | 0.250779  | 12.01 | ; qtot | 0.2801   |       |
| 11                             | PTB_ca | 1     | PTB     | C11  | 11   | -0.217522 | 12.01 | ; qtot | 0.06254  |       |
| 12                             | PTB_ca | 1     | PTB     | C12  | 12   | -0.280998 | 12.01 | ; qtot | -0.2185  |       |
| 13                             | PTB_ca | 1     | PTB     | C13  | 13   | -0.106842 | 12.01 | ; qtot | -0.3253  |       |
| 14                             | PTB_ca | 1     | PTB     | C14  | 14   | -0.076146 | 12.01 | ; qtot | -0.4014  |       |
| 15                             | PTB_ha | 1     | PTB     | H1   | 15   | 0.184387  | 1.008 | ; qtot | -0.2171  |       |
| 16                             | PTB_ha | 1     | PTB     | H2   | 16   | 0.151311  | 1.008 | ; qtot | -0.06574 |       |
| 17                             | PTB_ha | 1     | PTB     | H3   | 17   | 0.153899  | 1.008 | ; qtot | 0.08816  |       |
| 18                             | PTB_ha | 1     | PTB     | H4   | 18   | 0.184387  | 1.008 | ; qtot | 0.2725   |       |
| 19                             | PTB_ha | 1     | PTB     | H5   | 19   | 0.1958    | 1.008 | ; qtot | 0.4683   |       |

|    |        |   |     |     |    |           |       |                 |
|----|--------|---|-----|-----|----|-----------|-------|-----------------|
| 20 | PTB_ha | 1 | PTB | H6  | 20 | 0.153899  | 1.008 | ; qtot 0.6222   |
| 21 | PTB_ha | 1 | PTB | H7  | 21 | 0.151311  | 1.008 | ; qtot 0.7736   |
| 22 | PTB_ha | 1 | PTB | H8  | 22 | 0.1958    | 1.008 | ; qtot 0.9694   |
| 23 | PTB_na | 1 | PTB | N1  | 23 | -0.408906 | 14.01 | ; qtot 0.5604   |
| 24 | PTB_nd | 1 | PTB | N2  | 24 | 0.044289  | 14.01 | ; qtot 0.6047   |
| 25 | PTB_nd | 1 | PTB | N3  | 25 | 0.044289  | 14.01 | ; qtot 0.649    |
| 26 | PTB_na | 1 | PTB | N4  | 26 | -0.408906 | 14.01 | ; qtot 0.2401   |
| 27 | PTB_ca | 1 | PTB | C15 | 27 | 0.250755  | 12.01 | ; qtot 0.4909   |
| 28 | PTB_ca | 1 | PTB | C16 | 28 | -0.277609 | 12.01 | ; qtot 0.2133   |
| 29 | PTB_ca | 1 | PTB | C17 | 29 | 0.006689  | 12.01 | ; qtot 0.22     |
| 30 | PTB_ca | 1 | PTB | C18 | 30 | -0.277609 | 12.01 | ; qtot -0.05766 |
| 31 | PTB_ca | 1 | PTB | C19 | 31 | 0.250755  | 12.01 | ; qtot 0.1931   |
| 32 | PTB_ha | 1 | PTB | H9  | 32 | 0.183021  | 1.008 | ; qtot 0.3761   |
| 33 | PTB_ha | 1 | PTB | H10 | 33 | 0.157288  | 1.008 | ; qtot 0.5334   |
| 34 | PTB_ha | 1 | PTB | H11 | 34 | 0.183021  | 1.008 | ; qtot 0.7164   |
| 35 | PTB_nb | 1 | PTB | N5  | 35 | -0.04731  | 14.01 | ; qtot 0.6691   |
| 36 | PTB_pt | 1 | PTB | PT1 | 36 | -0.201109 | 195.0 | ; qtot 0.468    |
| 37 | PTB_cl | 1 | PTB | CL1 | 37 | -0.240282 | 35.45 | ; qtot 0.2277   |
| 38 | PTB_c3 | 1 | PTB | C20 | 38 | -0.668119 | 12.01 | ; qtot -0.4404  |
| 39 | PTB_c3 | 1 | PTB | C21 | 39 | 0.050403  | 12.01 | ; qtot -0.39    |
| 40 | PTB_h1 | 1 | PTB | H12 | 40 | 0.412608  | 1.008 | ; qtot 0.02262  |
| 41 | PTB_h1 | 1 | PTB | H13 | 41 | 0.412608  | 1.008 | ; qtot 0.4352   |
| 42 | PTB_c3 | 1 | PTB | C22 | 42 | 0.466356  | 12.01 | ; qtot 0.9016   |
| 43 | PTB_hc | 1 | PTB | H14 | 43 | -0.017213 | 1.008 | ; qtot 0.8844   |
| 44 | PTB_hc | 1 | PTB | H15 | 44 | -0.017213 | 1.008 | ; qtot 0.8672   |
| 45 | PTB_h1 | 1 | PTB | H16 | 45 | -0.175945 | 1.008 | ; qtot 0.6912   |
| 46 | PTB_h1 | 1 | PTB | H17 | 46 | -0.175945 | 1.008 | ; qtot 0.5153   |
| 47 | PTB_c3 | 1 | PTB | C23 | 47 | -0.668119 | 12.01 | ; qtot -0.1529  |
| 48 | PTB_c3 | 1 | PTB | C24 | 48 | 0.050403  | 12.01 | ; qtot -0.1024  |
| 49 | PTB_h1 | 1 | PTB | H18 | 49 | 0.412608  | 1.008 | ; qtot 0.3102   |
| 50 | PTB_h1 | 1 | PTB | H19 | 50 | 0.412608  | 1.008 | ; qtot 0.7228   |
| 51 | PTB_c3 | 1 | PTB | C25 | 51 | 0.466356  | 12.01 | ; qtot 1.189    |
| 52 | PTB_hc | 1 | PTB | H20 | 52 | -0.017213 | 1.008 | ; qtot 1.172    |
| 53 | PTB_hc | 1 | PTB | H21 | 53 | -0.017213 | 1.008 | ; qtot 1.155    |
| 54 | PTB_h1 | 1 | PTB | H22 | 54 | -0.175945 | 1.008 | ; qtot 0.9788   |
| 55 | PTB_h1 | 1 | PTB | H23 | 55 | -0.175945 | 1.008 | ; qtot 0.8028   |
| 56 | PTB_s6 | 1 | PTB | S1  | 56 | 1.1828    | 32.06 | ; qtot 1.986    |
| 57 | PTB_s6 | 1 | PTB | S2  | 57 | 1.1828    | 32.06 | ; qtot 3.168    |
| 58 | PTB_o  | 1 | PTB | O1  | 58 | -0.694737 | 16.00 | ; qtot 2.474    |
| 59 | PTB_o  | 1 | PTB | O2  | 59 | -0.694737 | 16.00 | ; qtot 1.779    |
| 60 | PTB_o  | 1 | PTB | O3  | 60 | -0.694737 | 16.00 | ; qtot 1.084    |
| 61 | PTB_o  | 1 | PTB | O4  | 61 | -0.694737 | 16.00 | ; qtot 0.3895   |
| 62 | PTB_o  | 1 | PTB | O5  | 62 | -0.694737 | 16.00 | ; qtot -0.3053  |
| 63 | PTB_o  | 1 | PTB | O6  | 63 | -0.694737 | 16.00 | ; qtot -1       |

[ bonds ]

| ; ai | aj | funct | c0      | c1       | c2 | c3 |
|------|----|-------|---------|----------|----|----|
| 1    | 25 | 1     | 0.13350 | 413880.0 |    |    |
| 1    | 26 | 1     | 0.13710 | 367190.0 |    |    |
| 1    | 31 | 1     | 0.14340 | 344510.0 |    |    |
| 2    | 23 | 1     | 0.13710 | 367190.0 |    |    |
| 2    | 24 | 1     | 0.13350 | 413880.0 |    |    |
| 2    | 27 | 1     | 0.14340 | 344510.0 |    |    |
| 3    | 4  | 1     | 0.13870 | 400330.0 |    |    |
| 3    | 5  | 1     | 0.13870 | 400330.0 |    |    |
| 3    | 23 | 1     | 0.13500 | 393550.0 |    |    |
| 4    | 6  | 1     | 0.13870 | 400330.0 |    |    |
| 4    | 24 | 1     | 0.13360 | 412460.0 |    |    |
| 5    | 7  | 1     | 0.13870 | 400330.0 |    |    |
| 5    | 15 | 1     | 0.10870 | 288110.0 |    |    |
| 6    | 8  | 1     | 0.13870 | 400330.0 |    |    |
| 6    | 22 | 1     | 0.10870 | 288110.0 |    |    |
| 7    | 8  | 1     | 0.13870 | 400330.0 |    |    |
| 7    | 21 | 1     | 0.10870 | 288110.0 |    |    |
| 8    | 20 | 1     | 0.10870 | 288110.0 |    |    |
| 9    | 10 | 1     | 0.13870 | 400330.0 |    |    |
| 9    | 11 | 1     | 0.13870 | 400330.0 |    |    |
| 9    | 25 | 1     | 0.13360 | 412460.0 |    |    |
| 10   | 12 | 1     | 0.13870 | 400330.0 |    |    |
| 10   | 26 | 1     | 0.13500 | 393550.0 |    |    |

|    |    |   |         |          |
|----|----|---|---------|----------|
| 11 | 13 | 1 | 0.13870 | 400330.0 |
| 11 | 19 | 1 | 0.10870 | 288110.0 |
| 12 | 14 | 1 | 0.13870 | 400330.0 |
| 12 | 18 | 1 | 0.10870 | 288110.0 |
| 13 | 14 | 1 | 0.13870 | 400330.0 |
| 13 | 17 | 1 | 0.10870 | 288110.0 |
| 14 | 16 | 1 | 0.10870 | 288110.0 |
| 23 | 47 | 1 | 0.14560 | 280080.0 |
| 24 | 36 | 1 | 0.20310 | 306270.0 |
| 25 | 36 | 1 | 0.20310 | 306270.0 |
| 26 | 38 | 1 | 0.14560 | 280080.0 |
| 27 | 28 | 1 | 0.13870 | 400330.0 |
| 27 | 35 | 1 | 0.13420 | 404260.0 |
| 28 | 29 | 1 | 0.13870 | 400330.0 |
| 28 | 32 | 1 | 0.10870 | 288110.0 |
| 29 | 30 | 1 | 0.13870 | 400330.0 |
| 29 | 33 | 1 | 0.10870 | 288110.0 |
| 30 | 31 | 1 | 0.13870 | 400330.0 |
| 30 | 34 | 1 | 0.10870 | 288110.0 |
| 31 | 35 | 1 | 0.13420 | 404260.0 |
| 35 | 36 | 1 | 0.19670 | 306270.0 |
| 36 | 37 | 1 | 0.22890 | 131440.0 |
| 38 | 39 | 1 | 0.15350 | 253630.0 |
| 38 | 40 | 1 | 0.10930 | 281080.0 |
| 38 | 41 | 1 | 0.10930 | 281080.0 |
| 39 | 42 | 1 | 0.15350 | 253630.0 |
| 39 | 43 | 1 | 0.10920 | 282250.0 |
| 39 | 44 | 1 | 0.10920 | 282250.0 |
| 42 | 45 | 1 | 0.10930 | 281080.0 |
| 42 | 46 | 1 | 0.10930 | 281080.0 |
| 42 | 56 | 1 | 0.17740 | 212550.0 |
| 47 | 48 | 1 | 0.15350 | 253630.0 |
| 47 | 49 | 1 | 0.10930 | 281080.0 |
| 47 | 50 | 1 | 0.10930 | 281080.0 |
| 48 | 51 | 1 | 0.15350 | 253630.0 |
| 48 | 52 | 1 | 0.10920 | 282250.0 |
| 48 | 53 | 1 | 0.10920 | 282250.0 |
| 51 | 54 | 1 | 0.10930 | 281080.0 |
| 51 | 55 | 1 | 0.10930 | 281080.0 |
| 51 | 57 | 1 | 0.17740 | 212550.0 |
| 56 | 61 | 1 | 0.14360 | 452790.0 |
| 56 | 62 | 1 | 0.14360 | 452790.0 |
| 56 | 63 | 1 | 0.14360 | 452790.0 |
| 57 | 58 | 1 | 0.14360 | 452790.0 |
| 57 | 59 | 1 | 0.14360 | 452790.0 |
| 57 | 60 | 1 | 0.14360 | 452790.0 |

```
[ pairs ]
; ai  aj  funct      c0      c1      c2      c3
  1  11  1
  1  12  1
  1  24  1
  1  27  1
  1  29  1
  1  34  1
  1  37  1
  1  39  1
  1  40  1
  1  41  1
  2   5  1
  2   6  1
  2  25  1
  2  29  1
  2  31  1
  2  32  1
  2  37  1
  2  48  1
  2  49  1
  2  50  1
  3   8  1
```

3 21 1  
3 22 1  
3 27 1  
3 36 1  
3 48 1  
3 49 1  
3 50 1  
4 7 1  
4 15 1  
4 20 1  
4 25 1  
4 27 1  
4 35 1  
4 37 1  
4 47 1  
5 6 1  
5 20 1  
5 24 1  
5 47 1  
6 21 1  
6 23 1  
6 36 1  
7 22 1  
7 23 1  
8 15 1  
8 24 1  
9 14 1  
9 17 1  
9 18 1  
9 24 1  
9 31 1  
9 35 1  
9 37 1  
9 38 1  
10 13 1  
10 16 1  
10 19 1  
10 31 1  
10 36 1  
10 39 1  
10 40 1  
10 41 1  
11 12 1  
11 16 1  
11 26 1  
11 36 1  
12 17 1  
12 25 1  
12 38 1  
13 18 1  
13 25 1  
14 19 1  
14 26 1  
15 21 1  
15 23 1  
16 17 1  
16 18 1  
17 19 1  
18 26 1  
19 25 1  
20 21 1  
20 22 1  
22 24 1  
23 28 1  
23 35 1  
23 36 1  
23 51 1  
23 52 1  
23 53 1  
24 28 1

24 31 1  
24 47 1  
25 27 1  
25 30 1  
25 38 1  
26 30 1  
26 35 1  
26 36 1  
26 42 1  
26 43 1  
26 44 1  
27 30 1  
27 33 1  
27 37 1  
27 47 1  
28 31 1  
28 34 1  
28 36 1  
29 35 1  
30 32 1  
30 36 1  
31 33 1  
31 37 1  
31 38 1  
32 33 1  
32 35 1  
33 34 1  
34 35 1  
38 45 1  
38 46 1  
38 56 1  
39 61 1  
39 62 1  
39 63 1  
40 42 1  
40 43 1  
40 44 1  
41 42 1  
41 43 1  
41 44 1  
43 45 1  
43 46 1  
43 56 1  
44 45 1  
44 46 1  
44 56 1  
45 61 1  
45 62 1  
45 63 1  
46 61 1  
46 62 1  
46 63 1  
47 54 1  
47 55 1  
47 57 1  
48 58 1  
48 59 1  
48 60 1  
49 51 1  
49 52 1  
49 53 1  
50 51 1  
50 52 1  
50 53 1  
52 54 1  
52 55 1  
52 57 1  
53 54 1  
53 55 1  
53 57 1

54 58 1  
 54 59 1  
 54 60 1  
 55 58 1  
 55 59 1  
 55 60 1

[ angles ]  
 ; ai aj ak funct c0 c1 c2 c3

|    |    |    |   |          |          |  |  |
|----|----|----|---|----------|----------|--|--|
| 25 | 1  | 26 | 1 | 112.0200 | 625.7600 |  |  |
| 25 | 1  | 31 | 1 | 123.0200 | 568.3500 |  |  |
| 26 | 1  | 31 | 1 | 123.4500 | 560.9100 |  |  |
| 23 | 2  | 24 | 1 | 112.0200 | 625.7600 |  |  |
| 23 | 2  | 27 | 1 | 123.4500 | 560.9100 |  |  |
| 24 | 2  | 27 | 1 | 123.0200 | 568.3500 |  |  |
| 4  | 3  | 5  | 1 | 119.9700 | 562.1600 |  |  |
| 4  | 3  | 23 | 1 | 118.3400 | 587.5200 |  |  |
| 5  | 3  | 23 | 1 | 119.9700 | 562.1600 |  |  |
| 3  | 4  | 6  | 1 | 119.9700 | 562.1600 |  |  |
| 3  | 4  | 24 | 1 | 119.7200 | 586.9300 |  |  |
| 6  | 4  | 24 | 1 | 119.7200 | 586.9300 |  |  |
| 3  | 5  | 7  | 1 | 119.9700 | 562.1600 |  |  |
| 3  | 5  | 15 | 1 | 120.0100 | 405.5100 |  |  |
| 7  | 5  | 15 | 1 | 120.0100 | 405.5100 |  |  |
| 4  | 6  | 8  | 1 | 119.9700 | 562.1600 |  |  |
| 4  | 6  | 22 | 1 | 120.0100 | 405.5100 |  |  |
| 8  | 6  | 22 | 1 | 120.0100 | 405.5100 |  |  |
| 5  | 7  | 8  | 1 | 119.9700 | 562.1600 |  |  |
| 5  | 7  | 21 | 1 | 120.0100 | 405.5100 |  |  |
| 8  | 7  | 21 | 1 | 120.0100 | 405.5100 |  |  |
| 6  | 8  | 7  | 1 | 119.9700 | 562.1600 |  |  |
| 6  | 8  | 20 | 1 | 120.0100 | 405.5100 |  |  |
| 7  | 8  | 20 | 1 | 120.0100 | 405.5100 |  |  |
| 10 | 9  | 11 | 1 | 119.9700 | 562.1600 |  |  |
| 10 | 9  | 25 | 1 | 119.7200 | 586.9300 |  |  |
| 11 | 9  | 25 | 1 | 119.7200 | 586.9300 |  |  |
| 9  | 10 | 12 | 1 | 119.9700 | 562.1600 |  |  |
| 9  | 10 | 26 | 1 | 118.3400 | 587.5200 |  |  |
| 12 | 10 | 26 | 1 | 118.3400 | 587.5200 |  |  |
| 9  | 11 | 13 | 1 | 119.9700 | 562.1600 |  |  |
| 9  | 11 | 19 | 1 | 120.0100 | 405.5100 |  |  |
| 13 | 11 | 19 | 1 | 120.0100 | 405.5100 |  |  |
| 10 | 12 | 14 | 1 | 119.9700 | 562.1600 |  |  |
| 10 | 12 | 18 | 1 | 120.0100 | 405.5100 |  |  |
| 14 | 12 | 18 | 1 | 120.0100 | 405.5100 |  |  |
| 11 | 13 | 14 | 1 | 119.9700 | 562.1600 |  |  |
| 11 | 13 | 17 | 1 | 120.0100 | 405.5100 |  |  |
| 14 | 13 | 17 | 1 | 120.0100 | 405.5100 |  |  |
| 12 | 14 | 13 | 1 | 119.9700 | 562.1600 |  |  |
| 12 | 14 | 16 | 1 | 120.0100 | 405.5100 |  |  |
| 13 | 14 | 16 | 1 | 120.0100 | 405.5100 |  |  |
| 2  | 23 | 3  | 1 | 113.1500 | 572.8700 |  |  |
| 2  | 23 | 47 | 1 | 125.0900 | 523.5000 |  |  |
| 3  | 23 | 47 | 1 | 124.3600 | 528.4400 |  |  |
| 2  | 24 | 4  | 1 | 104.9400 | 606.0900 |  |  |
| 2  | 24 | 36 | 1 | 104.9400 | 606.0900 |  |  |
| 4  | 24 | 36 | 1 | 140.9600 | 167.3600 |  |  |
| 1  | 25 | 9  | 1 | 104.9400 | 606.0900 |  |  |
| 1  | 25 | 36 | 1 | 111.7800 | 167.3600 |  |  |
| 9  | 25 | 36 | 1 | 140.9600 | 167.3600 |  |  |
| 1  | 26 | 10 | 1 | 113.1500 | 572.8700 |  |  |
| 1  | 26 | 38 | 1 | 125.0900 | 523.5000 |  |  |
| 10 | 26 | 38 | 1 | 124.3600 | 528.4400 |  |  |
| 2  | 27 | 28 | 1 | 120.1000 | 552.2000 |  |  |
| 2  | 27 | 35 | 1 | 118.0200 | 578.9800 |  |  |
| 28 | 27 | 35 | 1 | 122.6300 | 578.7300 |  |  |
| 27 | 28 | 29 | 1 | 119.9700 | 562.1600 |  |  |
| 27 | 28 | 32 | 1 | 120.0100 | 405.5100 |  |  |
| 29 | 28 | 32 | 1 | 120.0100 | 405.5100 |  |  |
| 28 | 29 | 30 | 1 | 119.9700 | 562.1600 |  |  |

|    |    |    |   |          |          |
|----|----|----|---|----------|----------|
| 28 | 29 | 33 | 1 | 120.0100 | 405.5100 |
| 30 | 29 | 33 | 1 | 120.0100 | 405.5100 |
| 29 | 30 | 31 | 1 | 119.9700 | 562.1600 |
| 29 | 30 | 34 | 1 | 120.0100 | 405.5100 |
| 31 | 30 | 34 | 1 | 120.0100 | 405.5100 |
| 1  | 31 | 30 | 1 | 120.1000 | 552.2000 |
| 1  | 31 | 35 | 1 | 118.0200 | 578.9800 |
| 30 | 31 | 35 | 1 | 122.6300 | 578.7300 |
| 27 | 35 | 31 | 1 | 115.8600 | 573.9600 |
| 27 | 35 | 36 | 1 | 118.7800 | 167.3600 |
| 31 | 35 | 36 | 1 | 118.7800 | 167.3600 |
| 24 | 36 | 25 | 1 | 160.3400 | 351.4600 |
| 24 | 36 | 35 | 1 | 80.1700  | 351.4600 |
| 24 | 36 | 37 | 1 | 99.8300  | 962.3200 |
| 25 | 36 | 35 | 1 | 80.1700  | 351.4600 |
| 25 | 36 | 37 | 1 | 99.8300  | 962.3200 |
| 35 | 36 | 37 | 1 | 180.0000 | 962.3200 |
| 26 | 38 | 39 | 1 | 112.8100 | 550.0300 |
| 26 | 38 | 40 | 1 | 109.4500 | 417.5600 |
| 26 | 38 | 41 | 1 | 109.4500 | 417.5600 |
| 39 | 38 | 40 | 1 | 110.0700 | 387.9400 |
| 39 | 38 | 41 | 1 | 110.0700 | 387.9400 |
| 40 | 38 | 41 | 1 | 109.5500 | 327.8600 |
| 38 | 39 | 42 | 1 | 110.6300 | 528.9400 |
| 38 | 39 | 43 | 1 | 110.0500 | 388.0200 |
| 38 | 39 | 44 | 1 | 110.0500 | 388.0200 |
| 42 | 39 | 43 | 1 | 110.0500 | 388.0200 |
| 42 | 39 | 44 | 1 | 110.0500 | 388.0200 |
| 43 | 39 | 44 | 1 | 108.3500 | 329.9500 |
| 39 | 42 | 45 | 1 | 110.0700 | 387.9400 |
| 39 | 42 | 46 | 1 | 110.0700 | 387.9400 |
| 39 | 42 | 56 | 1 | 110.0000 | 527.0200 |
| 45 | 42 | 46 | 1 | 109.5500 | 327.8600 |
| 45 | 42 | 56 | 1 | 108.1100 | 367.0200 |
| 46 | 42 | 56 | 1 | 108.1100 | 367.0200 |
| 23 | 47 | 48 | 1 | 112.8100 | 550.0300 |
| 23 | 47 | 49 | 1 | 109.4500 | 417.5600 |
| 23 | 47 | 50 | 1 | 109.4500 | 417.5600 |
| 48 | 47 | 49 | 1 | 110.0700 | 387.9400 |
| 48 | 47 | 50 | 1 | 110.0700 | 387.9400 |
| 49 | 47 | 50 | 1 | 109.5500 | 327.8600 |
| 47 | 48 | 51 | 1 | 110.6300 | 528.9400 |
| 47 | 48 | 52 | 1 | 110.0500 | 388.0200 |
| 47 | 48 | 53 | 1 | 110.0500 | 388.0200 |
| 51 | 48 | 52 | 1 | 110.0500 | 388.0200 |
| 51 | 48 | 53 | 1 | 110.0500 | 388.0200 |
| 52 | 48 | 53 | 1 | 108.3500 | 329.9500 |
| 48 | 51 | 54 | 1 | 110.0700 | 387.9400 |
| 48 | 51 | 55 | 1 | 110.0700 | 387.9400 |
| 48 | 51 | 57 | 1 | 110.0000 | 527.0200 |
| 54 | 51 | 55 | 1 | 109.5500 | 327.8600 |
| 54 | 51 | 57 | 1 | 108.1100 | 367.0200 |
| 55 | 51 | 57 | 1 | 108.1100 | 367.0200 |
| 42 | 56 | 61 | 1 | 108.3200 | 557.2300 |
| 42 | 56 | 62 | 1 | 108.3200 | 557.2300 |
| 42 | 56 | 63 | 1 | 108.3200 | 557.2300 |
| 61 | 56 | 62 | 1 | 119.7300 | 624.0900 |
| 61 | 56 | 63 | 1 | 119.7300 | 624.0900 |
| 62 | 56 | 63 | 1 | 119.7300 | 624.0900 |
| 51 | 57 | 58 | 1 | 108.3200 | 557.2300 |
| 51 | 57 | 59 | 1 | 108.3200 | 557.2300 |
| 51 | 57 | 60 | 1 | 108.3200 | 557.2300 |
| 58 | 57 | 59 | 1 | 119.7300 | 624.0900 |
| 58 | 57 | 60 | 1 | 119.7300 | 624.0900 |
| 59 | 57 | 60 | 1 | 119.7300 | 624.0900 |

[ dihedrals ]

| ; | ai | aj | ak | al | funct | c0       | c1      | c2        | c3      | c4      | c5      |
|---|----|----|----|----|-------|----------|---------|-----------|---------|---------|---------|
|   | 26 | 1  | 25 | 9  | 3     | 39.74800 | 0.00000 | -39.74800 | 0.00000 | 0.00000 | 0.00000 |
|   | 26 | 1  | 25 | 36 | 3     | 39.74800 | 0.00000 | -39.74800 | 0.00000 | 0.00000 | 0.00000 |







|    |    |    |    |   |         |         |         |          |         |         |
|----|----|----|----|---|---------|---------|---------|----------|---------|---------|
| 26 | 38 | 39 | 42 | 3 | 0.65084 | 1.95253 | 0.00000 | -2.60338 | 0.00000 | 0.00000 |
| 26 | 38 | 39 | 43 | 3 | 0.65084 | 1.95253 | 0.00000 | -2.60338 | 0.00000 | 0.00000 |
| 26 | 38 | 39 | 44 | 3 | 0.65084 | 1.95253 | 0.00000 | -2.60338 | 0.00000 | 0.00000 |
| 40 | 38 | 39 | 42 | 3 | 0.65084 | 1.95253 | 0.00000 | -2.60338 | 0.00000 | 0.00000 |
| 40 | 38 | 39 | 43 | 3 | 0.65084 | 1.95253 | 0.00000 | -2.60338 | 0.00000 | 0.00000 |
| 40 | 38 | 39 | 44 | 3 | 0.65084 | 1.95253 | 0.00000 | -2.60338 | 0.00000 | 0.00000 |
| 41 | 38 | 39 | 42 | 3 | 0.65084 | 1.95253 | 0.00000 | -2.60338 | 0.00000 | 0.00000 |
| 41 | 38 | 39 | 43 | 3 | 0.65084 | 1.95253 | 0.00000 | -2.60338 | 0.00000 | 0.00000 |
| 41 | 38 | 39 | 44 | 3 | 0.65084 | 1.95253 | 0.00000 | -2.60338 | 0.00000 | 0.00000 |
| 38 | 39 | 42 | 45 | 3 | 0.65084 | 1.95253 | 0.00000 | -2.60338 | 0.00000 | 0.00000 |
| 38 | 39 | 42 | 46 | 3 | 0.65084 | 1.95253 | 0.00000 | -2.60338 | 0.00000 | 0.00000 |
| 38 | 39 | 42 | 56 | 3 | 0.65084 | 1.95253 | 0.00000 | -2.60338 | 0.00000 | 0.00000 |
| 43 | 39 | 42 | 45 | 3 | 0.65084 | 1.95253 | 0.00000 | -2.60338 | 0.00000 | 0.00000 |
| 43 | 39 | 42 | 46 | 3 | 0.65084 | 1.95253 | 0.00000 | -2.60338 | 0.00000 | 0.00000 |
| 43 | 39 | 42 | 56 | 3 | 0.65084 | 1.95253 | 0.00000 | -2.60338 | 0.00000 | 0.00000 |
| 44 | 39 | 42 | 45 | 3 | 0.65084 | 1.95253 | 0.00000 | -2.60338 | 0.00000 | 0.00000 |
| 44 | 39 | 42 | 46 | 3 | 0.65084 | 1.95253 | 0.00000 | -2.60338 | 0.00000 | 0.00000 |
| 44 | 39 | 42 | 56 | 3 | 0.65084 | 1.95253 | 0.00000 | -2.60338 | 0.00000 | 0.00000 |
| 39 | 42 | 56 | 61 | 3 | 0.60436 | 1.81307 | 0.00000 | -2.41742 | 0.00000 | 0.00000 |
| 39 | 42 | 56 | 62 | 3 | 0.60436 | 1.81307 | 0.00000 | -2.41742 | 0.00000 | 0.00000 |
| 39 | 42 | 56 | 63 | 3 | 0.60436 | 1.81307 | 0.00000 | -2.41742 | 0.00000 | 0.00000 |
| 45 | 42 | 56 | 61 | 3 | 0.60436 | 1.81307 | 0.00000 | -2.41742 | 0.00000 | 0.00000 |
| 45 | 42 | 56 | 62 | 3 | 0.60436 | 1.81307 | 0.00000 | -2.41742 | 0.00000 | 0.00000 |
| 45 | 42 | 56 | 63 | 3 | 0.60436 | 1.81307 | 0.00000 | -2.41742 | 0.00000 | 0.00000 |
| 46 | 42 | 56 | 61 | 3 | 0.60436 | 1.81307 | 0.00000 | -2.41742 | 0.00000 | 0.00000 |
| 46 | 42 | 56 | 62 | 3 | 0.60436 | 1.81307 | 0.00000 | -2.41742 | 0.00000 | 0.00000 |
| 46 | 42 | 56 | 63 | 3 | 0.60436 | 1.81307 | 0.00000 | -2.41742 | 0.00000 | 0.00000 |
| 23 | 47 | 48 | 51 | 3 | 0.65084 | 1.95253 | 0.00000 | -2.60338 | 0.00000 | 0.00000 |
| 23 | 47 | 48 | 52 | 3 | 0.65084 | 1.95253 | 0.00000 | -2.60338 | 0.00000 | 0.00000 |
| 23 | 47 | 48 | 53 | 3 | 0.65084 | 1.95253 | 0.00000 | -2.60338 | 0.00000 | 0.00000 |
| 49 | 47 | 48 | 51 | 3 | 0.65084 | 1.95253 | 0.00000 | -2.60338 | 0.00000 | 0.00000 |
| 49 | 47 | 48 | 52 | 3 | 0.65084 | 1.95253 | 0.00000 | -2.60338 | 0.00000 | 0.00000 |
| 49 | 47 | 48 | 53 | 3 | 0.65084 | 1.95253 | 0.00000 | -2.60338 | 0.00000 | 0.00000 |
| 50 | 47 | 48 | 51 | 3 | 0.65084 | 1.95253 | 0.00000 | -2.60338 | 0.00000 | 0.00000 |
| 50 | 47 | 48 | 52 | 3 | 0.65084 | 1.95253 | 0.00000 | -2.60338 | 0.00000 | 0.00000 |
| 50 | 47 | 48 | 53 | 3 | 0.65084 | 1.95253 | 0.00000 | -2.60338 | 0.00000 | 0.00000 |
| 47 | 48 | 51 | 54 | 3 | 0.65084 | 1.95253 | 0.00000 | -2.60338 | 0.00000 | 0.00000 |
| 47 | 48 | 51 | 55 | 3 | 0.65084 | 1.95253 | 0.00000 | -2.60338 | 0.00000 | 0.00000 |
| 47 | 48 | 51 | 57 | 3 | 0.65084 | 1.95253 | 0.00000 | -2.60338 | 0.00000 | 0.00000 |
| 52 | 48 | 51 | 54 | 3 | 0.65084 | 1.95253 | 0.00000 | -2.60338 | 0.00000 | 0.00000 |
| 52 | 48 | 51 | 55 | 3 | 0.65084 | 1.95253 | 0.00000 | -2.60338 | 0.00000 | 0.00000 |
| 52 | 48 | 51 | 57 | 3 | 0.65084 | 1.95253 | 0.00000 | -2.60338 | 0.00000 | 0.00000 |
| 53 | 48 | 51 | 54 | 3 | 0.65084 | 1.95253 | 0.00000 | -2.60338 | 0.00000 | 0.00000 |
| 53 | 48 | 51 | 55 | 3 | 0.65084 | 1.95253 | 0.00000 | -2.60338 | 0.00000 | 0.00000 |
| 53 | 48 | 51 | 57 | 3 | 0.65084 | 1.95253 | 0.00000 | -2.60338 | 0.00000 | 0.00000 |
| 48 | 51 | 57 | 58 | 3 | 0.60436 | 1.81307 | 0.00000 | -2.41742 | 0.00000 | 0.00000 |
| 48 | 51 | 57 | 59 | 3 | 0.60436 | 1.81307 | 0.00000 | -2.41742 | 0.00000 | 0.00000 |
| 48 | 51 | 57 | 60 | 3 | 0.60436 | 1.81307 | 0.00000 | -2.41742 | 0.00000 | 0.00000 |
| 54 | 51 | 57 | 58 | 3 | 0.60436 | 1.81307 | 0.00000 | -2.41742 | 0.00000 | 0.00000 |
| 54 | 51 | 57 | 59 | 3 | 0.60436 | 1.81307 | 0.00000 | -2.41742 | 0.00000 | 0.00000 |
| 54 | 51 | 57 | 60 | 3 | 0.60436 | 1.81307 | 0.00000 | -2.41742 | 0.00000 | 0.00000 |
| 55 | 51 | 57 | 58 | 3 | 0.60436 | 1.81307 | 0.00000 | -2.41742 | 0.00000 | 0.00000 |
| 55 | 51 | 57 | 59 | 3 | 0.60436 | 1.81307 | 0.00000 | -2.41742 | 0.00000 | 0.00000 |
| 55 | 51 | 57 | 60 | 3 | 0.60436 | 1.81307 | 0.00000 | -2.41742 | 0.00000 | 0.00000 |

[ dihedrals ]

| ; ai | aj | ak | al | funct | c0     | c1      | c2 | c3 |
|------|----|----|----|-------|--------|---------|----|----|
| 1    | 26 | 10 | 38 | 1     | 180.00 | 4.60240 | 2  |    |
| 2    | 23 | 3  | 47 | 1     | 180.00 | 4.60240 | 2  |    |
| 3    | 7  | 5  | 15 | 1     | 180.00 | 4.60240 | 2  |    |
| 3    | 6  | 4  | 24 | 1     | 180.00 | 4.60240 | 2  |    |
| 4    | 8  | 6  | 22 | 1     | 180.00 | 4.60240 | 2  |    |
| 4    | 5  | 3  | 23 | 1     | 180.00 | 4.60240 | 2  |    |
| 5    | 8  | 7  | 21 | 1     | 180.00 | 4.60240 | 2  |    |
| 6    | 7  | 8  | 20 | 1     | 180.00 | 4.60240 | 2  |    |
| 9    | 13 | 11 | 19 | 1     | 180.00 | 4.60240 | 2  |    |
| 9    | 12 | 10 | 26 | 1     | 180.00 | 4.60240 | 2  |    |
| 10   | 14 | 12 | 18 | 1     | 180.00 | 4.60240 | 2  |    |
| 10   | 11 | 9  | 25 | 1     | 180.00 | 4.60240 | 2  |    |
| 11   | 14 | 13 | 17 | 1     | 180.00 | 4.60240 | 2  |    |

|    |    |    |    |   |        |         |   |
|----|----|----|----|---|--------|---------|---|
| 12 | 13 | 14 | 16 | 1 | 180.00 | 4.60240 | 2 |
| 24 | 2  | 23 | 27 | 1 | 180.00 | 4.60240 | 2 |
| 25 | 1  | 26 | 31 | 1 | 180.00 | 4.60240 | 2 |
| 27 | 29 | 28 | 32 | 1 | 180.00 | 4.60240 | 2 |
| 28 | 30 | 29 | 33 | 1 | 180.00 | 4.60240 | 2 |
| 28 | 2  | 27 | 35 | 1 | 180.00 | 4.60240 | 2 |
| 29 | 31 | 30 | 34 | 1 | 180.00 | 4.60240 | 2 |
| 30 | 1  | 31 | 35 | 1 | 180.00 | 4.60240 | 2 |

[ system ]

; Name

PtB

[ molecules ]

; Compound #mols

PtB 1

**Table S9.** Force field parameters of Pt<sup>s</sup>B system in GROMACS format used in this work.

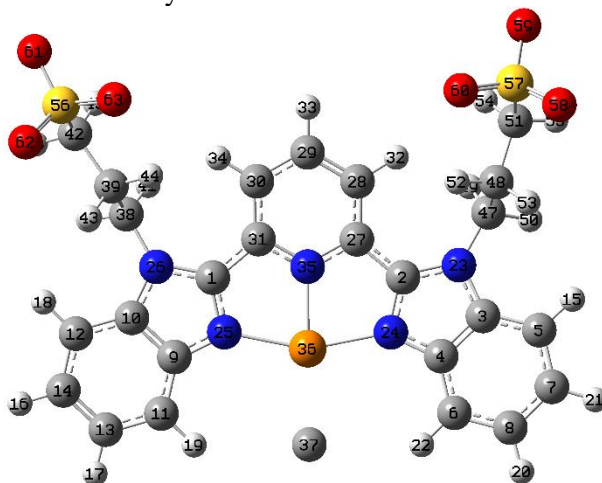

**; Pt<sup>s</sup>B force field parameters  
;PtsB\_GMX.top**

```
[ defaults ]
; nbfunc      comb-rule  gen-pairs  fudgeLJ  fudgeQQ
1             2          yes           0.5      0.8333

[ atomtypes ]
; name        at.num  mass      charge  ptype  sigma      epsilon
PTsB_cc      6       12.01     0.0000  A      3.39967e-01  3.59824e-01
PTsB_ca      6       12.01     0.0000  A      3.39967e-01  3.59824e-01
PTsB_ha      1       1.008     0.0000  A      2.59964e-01  6.27600e-02
PTsB_na      7       14.01     0.0000  A      3.25000e-01  7.11280e-01
PTsB_nd      7       14.01     0.0000  A      3.25000e-01  7.11280e-01
PTsB_nb      7       14.01     0.0000  A      3.25000e-01  7.11280e-01
PTsB_Pt      78      195.078   0.0000  A      4.34750e-01  1.6736      ; the only different parameters corresponding to PtB
PTsB_cl      17      35.45     0.0000  A      3.47094e-01  1.10876e+00
PTsB_c3      6       12.01     0.0000  A      3.39967e-01  4.57730e-01
PTsB_h1      1       1.008     0.0000  A      2.47135e-01  6.56888e-02
PTsB_hc      1       1.008     0.0000  A      2.64953e-01  6.56888e-02
PTsB_s6      16      32.06     0.0000  A      3.56359e-01  1.04600e+00
PTsB_o       8       16.00     0.0000  A      2.95992e-01  8.78640e-01

[ moleculetype ]
; Name        nrexcl
PtsB          3

[ atoms ]
; nr  type  resnr  residue  atom  cgnr  charge  mass  typeB  chargeB  massB
1  PTsB_cc  1  PTsB  C1  1  0.081892  12.01 ; qtot 0.08189
2  PTsB_cc  1  PTsB  C2  2  0.081892  12.01 ; qtot 0.1638
3  PTsB_ca  1  PTsB  C3  3  0.250779  12.01 ; qtot 0.4146
4  PTsB_ca  1  PTsB  C4  4  0.148116  12.01 ; qtot 0.5627
5  PTsB_ca  1  PTsB  C5  5  -0.280998  12.01 ; qtot 0.2817
6  PTsB_ca  1  PTsB  C6  6  -0.217522  12.01 ; qtot 0.06416
7  PTsB_ca  1  PTsB  C7  7  -0.076146  12.01 ; qtot -0.01199
8  PTsB_ca  1  PTsB  C8  8  -0.106842  12.01 ; qtot -0.1188
9  PTsB_ca  1  PTsB  C9  9  0.148116  12.01 ; qtot 0.02929
10 PTsB_ca  1  PTsB  C10 10  0.250779  12.01 ; qtot 0.2801
11 PTsB_ca  1  PTsB  C11 11  -0.217522  12.01 ; qtot 0.06254
12 PTsB_ca  1  PTsB  C12 12  -0.280998  12.01 ; qtot -0.2185
13 PTsB_ca  1  PTsB  C13 13  -0.106842  12.01 ; qtot -0.3253
14 PTsB_ca  1  PTsB  C14 14  -0.076146  12.01 ; qtot -0.4014
15 PTsB_ha  1  PTsB  H1  15  0.184387  1.008 ; qtot -0.2171
16 PTsB_ha  1  PTsB  H2  16  0.151311  1.008 ; qtot -0.06574
17 PTsB_ha  1  PTsB  H3  17  0.153899  1.008 ; qtot 0.08816
18 PTsB_ha  1  PTsB  H4  18  0.184387  1.008 ; qtot 0.2725
19 PTsB_ha  1  PTsB  H5  19  0.1958    1.008 ; qtot 0.4683
20 PTsB_ha  1  PTsB  H6  20  0.153899  1.008 ; qtot 0.6222
```

|    |         |   |      |     |    |           |       |                 |
|----|---------|---|------|-----|----|-----------|-------|-----------------|
| 21 | PTsB_ha | 1 | PTsB | H7  | 21 | 0.151311  | 1.008 | ; qtot 0.7736   |
| 22 | PTsB_ha | 1 | PTsB | H8  | 22 | 0.1958    | 1.008 | ; qtot 0.9694   |
| 23 | PTsB_na | 1 | PTsB | N1  | 23 | -0.408906 | 14.01 | ; qtot 0.5604   |
| 24 | PTsB_nd | 1 | PTsB | N2  | 24 | 0.044289  | 14.01 | ; qtot 0.6047   |
| 25 | PTsB_nd | 1 | PTsB | N3  | 25 | 0.044289  | 14.01 | ; qtot 0.649    |
| 26 | PTsB_na | 1 | PTsB | N4  | 26 | -0.408906 | 14.01 | ; qtot 0.2401   |
| 27 | PTsB_ca | 1 | PTsB | C15 | 27 | 0.250755  | 12.01 | ; qtot 0.4909   |
| 28 | PTsB_ca | 1 | PTsB | C16 | 28 | -0.277609 | 12.01 | ; qtot 0.2133   |
| 29 | PTsB_ca | 1 | PTsB | C17 | 29 | 0.006689  | 12.01 | ; qtot 0.22     |
| 30 | PTsB_ca | 1 | PTsB | C18 | 30 | -0.277609 | 12.01 | ; qtot -0.05766 |
| 31 | PTsB_ca | 1 | PTsB | C19 | 31 | 0.250755  | 12.01 | ; qtot 0.1931   |
| 32 | PTsB_ha | 1 | PTsB | H9  | 32 | 0.183021  | 1.008 | ; qtot 0.3761   |
| 33 | PTsB_ha | 1 | PTsB | H10 | 33 | 0.157288  | 1.008 | ; qtot 0.5334   |
| 34 | PTsB_ha | 1 | PTsB | H11 | 34 | 0.183021  | 1.008 | ; qtot 0.7164   |
| 35 | PTsB_nb | 1 | PTsB | N5  | 35 | -0.04731  | 14.01 | ; qtot 0.6691   |
| 36 | PTsB_Pt | 1 | PTsB | PT1 | 36 | -0.201109 | 195.0 | ; qtot 0.468    |
| 37 | PTsB_cl | 1 | PTsB | CL1 | 37 | -0.240282 | 35.45 | ; qtot 0.2277   |
| 38 | PTsB_c3 | 1 | PTsB | C20 | 38 | -0.668119 | 12.01 | ; qtot -0.4404  |
| 39 | PTsB_c3 | 1 | PTsB | C21 | 39 | 0.050403  | 12.01 | ; qtot -0.39    |
| 40 | PTsB_h1 | 1 | PTsB | H12 | 40 | 0.412608  | 1.008 | ; qtot 0.02262  |
| 41 | PTsB_h1 | 1 | PTsB | H13 | 41 | 0.412608  | 1.008 | ; qtot 0.4352   |
| 42 | PTsB_c3 | 1 | PTsB | C22 | 42 | 0.466356  | 12.01 | ; qtot 0.9016   |
| 43 | PTsB_hc | 1 | PTsB | H14 | 43 | -0.017213 | 1.008 | ; qtot 0.8844   |
| 44 | PTsB_hc | 1 | PTsB | H15 | 44 | -0.017213 | 1.008 | ; qtot 0.8672   |
| 45 | PTsB_h1 | 1 | PTsB | H16 | 45 | -0.175945 | 1.008 | ; qtot 0.6912   |
| 46 | PTsB_h1 | 1 | PTsB | H17 | 46 | -0.175945 | 1.008 | ; qtot 0.5153   |
| 47 | PTsB_c3 | 1 | PTsB | C23 | 47 | -0.668119 | 12.01 | ; qtot -0.1529  |
| 48 | PTsB_c3 | 1 | PTsB | C24 | 48 | 0.050403  | 12.01 | ; qtot -0.1024  |
| 49 | PTsB_h1 | 1 | PTsB | H18 | 49 | 0.412608  | 1.008 | ; qtot 0.3102   |
| 50 | PTsB_h1 | 1 | PTsB | H19 | 50 | 0.412608  | 1.008 | ; qtot 0.7228   |
| 51 | PTsB_c3 | 1 | PTsB | C25 | 51 | 0.466356  | 12.01 | ; qtot 1.189    |
| 52 | PTsB_hc | 1 | PTsB | H20 | 52 | -0.017213 | 1.008 | ; qtot 1.172    |
| 53 | PTsB_hc | 1 | PTsB | H21 | 53 | -0.017213 | 1.008 | ; qtot 1.155    |
| 54 | PTsB_h1 | 1 | PTsB | H22 | 54 | -0.175945 | 1.008 | ; qtot 0.9788   |
| 55 | PTsB_h1 | 1 | PTsB | H23 | 55 | -0.175945 | 1.008 | ; qtot 0.8028   |
| 56 | PTsB_s6 | 1 | PTsB | S1  | 56 | 1.1828    | 32.06 | ; qtot 1.986    |
| 57 | PTsB_s6 | 1 | PTsB | S2  | 57 | 1.1828    | 32.06 | ; qtot 3.168    |
| 58 | PTsB_o  | 1 | PTsB | O1  | 58 | -0.694737 | 16.00 | ; qtot 2.474    |
| 59 | PTsB_o  | 1 | PTsB | O2  | 59 | -0.694737 | 16.00 | ; qtot 1.779    |
| 60 | PTsB_o  | 1 | PTsB | O3  | 60 | -0.694737 | 16.00 | ; qtot 1.084    |
| 61 | PTsB_o  | 1 | PTsB | O4  | 61 | -0.694737 | 16.00 | ; qtot 0.3895   |
| 62 | PTsB_o  | 1 | PTsB | O5  | 62 | -0.694737 | 16.00 | ; qtot -0.3053  |
| 63 | PTsB_o  | 1 | PTsB | O6  | 63 | -0.694737 | 16.00 | ; qtot -1       |

[ bonds ]

| ; ai | aj | funct | c0      | c1       | c2 | c3 |
|------|----|-------|---------|----------|----|----|
| 1    | 25 | 1     | 0.13350 | 413880.0 |    |    |
| 1    | 26 | 1     | 0.13710 | 367190.0 |    |    |
| 1    | 31 | 1     | 0.14340 | 344510.0 |    |    |
| 2    | 23 | 1     | 0.13710 | 367190.0 |    |    |
| 2    | 24 | 1     | 0.13350 | 413880.0 |    |    |
| 2    | 27 | 1     | 0.14340 | 344510.0 |    |    |
| 3    | 4  | 1     | 0.13870 | 400330.0 |    |    |
| 3    | 5  | 1     | 0.13870 | 400330.0 |    |    |
| 3    | 23 | 1     | 0.13500 | 393550.0 |    |    |
| 4    | 6  | 1     | 0.13870 | 400330.0 |    |    |
| 4    | 24 | 1     | 0.13360 | 412460.0 |    |    |
| 5    | 7  | 1     | 0.13870 | 400330.0 |    |    |
| 5    | 15 | 1     | 0.10870 | 288110.0 |    |    |
| 6    | 8  | 1     | 0.13870 | 400330.0 |    |    |
| 6    | 22 | 1     | 0.10870 | 288110.0 |    |    |
| 7    | 8  | 1     | 0.13870 | 400330.0 |    |    |
| 7    | 21 | 1     | 0.10870 | 288110.0 |    |    |
| 8    | 20 | 1     | 0.10870 | 288110.0 |    |    |
| 9    | 10 | 1     | 0.13870 | 400330.0 |    |    |
| 9    | 11 | 1     | 0.13870 | 400330.0 |    |    |
| 9    | 25 | 1     | 0.13360 | 412460.0 |    |    |
| 10   | 12 | 1     | 0.13870 | 400330.0 |    |    |
| 10   | 26 | 1     | 0.13500 | 393550.0 |    |    |
| 11   | 13 | 1     | 0.13870 | 400330.0 |    |    |

|    |    |   |         |          |
|----|----|---|---------|----------|
| 11 | 19 | 1 | 0.10870 | 288110.0 |
| 12 | 14 | 1 | 0.13870 | 400330.0 |
| 12 | 18 | 1 | 0.10870 | 288110.0 |
| 13 | 14 | 1 | 0.13870 | 400330.0 |
| 13 | 17 | 1 | 0.10870 | 288110.0 |
| 14 | 16 | 1 | 0.10870 | 288110.0 |
| 23 | 47 | 1 | 0.14560 | 280080.0 |
| 24 | 36 | 1 | 0.20310 | 306270.0 |
| 25 | 36 | 1 | 0.20310 | 306270.0 |
| 26 | 38 | 1 | 0.14560 | 280080.0 |
| 27 | 28 | 1 | 0.13870 | 400330.0 |
| 27 | 35 | 1 | 0.13420 | 404260.0 |
| 28 | 29 | 1 | 0.13870 | 400330.0 |
| 28 | 32 | 1 | 0.10870 | 288110.0 |
| 29 | 30 | 1 | 0.13870 | 400330.0 |
| 29 | 33 | 1 | 0.10870 | 288110.0 |
| 30 | 31 | 1 | 0.13870 | 400330.0 |
| 30 | 34 | 1 | 0.10870 | 288110.0 |
| 31 | 35 | 1 | 0.13420 | 404260.0 |
| 35 | 36 | 1 | 0.19670 | 306270.0 |
| 36 | 37 | 1 | 0.22890 | 131440.0 |
| 38 | 39 | 1 | 0.15350 | 253630.0 |
| 38 | 40 | 1 | 0.10930 | 281080.0 |
| 38 | 41 | 1 | 0.10930 | 281080.0 |
| 39 | 42 | 1 | 0.15350 | 253630.0 |
| 39 | 43 | 1 | 0.10920 | 282250.0 |
| 39 | 44 | 1 | 0.10920 | 282250.0 |
| 42 | 45 | 1 | 0.10930 | 281080.0 |
| 42 | 46 | 1 | 0.10930 | 281080.0 |
| 42 | 56 | 1 | 0.17740 | 212550.0 |
| 47 | 48 | 1 | 0.15350 | 253630.0 |
| 47 | 49 | 1 | 0.10930 | 281080.0 |
| 47 | 50 | 1 | 0.10930 | 281080.0 |
| 48 | 51 | 1 | 0.15350 | 253630.0 |
| 48 | 52 | 1 | 0.10920 | 282250.0 |
| 48 | 53 | 1 | 0.10920 | 282250.0 |
| 51 | 54 | 1 | 0.10930 | 281080.0 |
| 51 | 55 | 1 | 0.10930 | 281080.0 |
| 51 | 57 | 1 | 0.17740 | 212550.0 |
| 56 | 61 | 1 | 0.14360 | 452790.0 |
| 56 | 62 | 1 | 0.14360 | 452790.0 |
| 56 | 63 | 1 | 0.14360 | 452790.0 |
| 57 | 58 | 1 | 0.14360 | 452790.0 |
| 57 | 59 | 1 | 0.14360 | 452790.0 |
| 57 | 60 | 1 | 0.14360 | 452790.0 |

[ pairs ]

| ; ai | aj | funct | c0 | c1 | c2 | c3 |
|------|----|-------|----|----|----|----|
| 1    | 11 | 1     |    |    |    |    |
| 1    | 12 | 1     |    |    |    |    |
| 1    | 24 | 1     |    |    |    |    |
| 1    | 27 | 1     |    |    |    |    |
| 1    | 29 | 1     |    |    |    |    |
| 1    | 34 | 1     |    |    |    |    |
| 1    | 37 | 1     |    |    |    |    |
| 1    | 39 | 1     |    |    |    |    |
| 1    | 40 | 1     |    |    |    |    |
| 1    | 41 | 1     |    |    |    |    |
| 2    | 5  | 1     |    |    |    |    |
| 2    | 6  | 1     |    |    |    |    |
| 2    | 25 | 1     |    |    |    |    |
| 2    | 29 | 1     |    |    |    |    |
| 2    | 31 | 1     |    |    |    |    |
| 2    | 32 | 1     |    |    |    |    |
| 2    | 37 | 1     |    |    |    |    |
| 2    | 48 | 1     |    |    |    |    |
| 2    | 49 | 1     |    |    |    |    |
| 2    | 50 | 1     |    |    |    |    |
| 3    | 8  | 1     |    |    |    |    |
| 3    | 21 | 1     |    |    |    |    |

3 22 1  
3 27 1  
3 36 1  
3 48 1  
3 49 1  
3 50 1  
4 7 1  
4 15 1  
4 20 1  
4 25 1  
4 27 1  
4 35 1  
4 37 1  
4 47 1  
5 6 1  
5 20 1  
5 24 1  
5 47 1  
6 21 1  
6 23 1  
6 36 1  
7 22 1  
7 23 1  
8 15 1  
8 24 1  
9 14 1  
9 17 1  
9 18 1  
9 24 1  
9 31 1  
9 35 1  
9 37 1  
9 38 1  
10 13 1  
10 16 1  
10 19 1  
10 31 1  
10 36 1  
10 39 1  
10 40 1  
10 41 1  
11 12 1  
11 16 1  
11 26 1  
11 36 1  
12 17 1  
12 25 1  
12 38 1  
13 18 1  
13 25 1  
14 19 1  
14 26 1  
15 21 1  
15 23 1  
16 17 1  
16 18 1  
17 19 1  
18 26 1  
19 25 1  
20 21 1  
20 22 1  
22 24 1  
23 28 1  
23 35 1  
23 36 1  
23 51 1  
23 52 1  
23 53 1  
24 28 1  
24 31 1

24 47 1  
25 27 1  
25 30 1  
25 38 1  
26 30 1  
26 35 1  
26 36 1  
26 42 1  
26 43 1  
26 44 1  
27 30 1  
27 33 1  
27 37 1  
27 47 1  
28 31 1  
28 34 1  
28 36 1  
29 35 1  
30 32 1  
30 36 1  
31 33 1  
31 37 1  
31 38 1  
32 33 1  
32 35 1  
33 34 1  
34 35 1  
38 45 1  
38 46 1  
38 56 1  
39 61 1  
39 62 1  
39 63 1  
40 42 1  
40 43 1  
40 44 1  
41 42 1  
41 43 1  
41 44 1  
43 45 1  
43 46 1  
43 56 1  
44 45 1  
44 46 1  
44 56 1  
45 61 1  
45 62 1  
45 63 1  
46 61 1  
46 62 1  
46 63 1  
47 54 1  
47 55 1  
47 57 1  
48 58 1  
48 59 1  
48 60 1  
49 51 1  
49 52 1  
49 53 1  
50 51 1  
50 52 1  
50 53 1  
52 54 1  
52 55 1  
52 57 1  
53 54 1  
53 55 1  
53 57 1  
54 58 1



54 59 1  
 54 60 1  
 55 58 1  
 55 59 1  
 55 60 1

[ angles ]  
 ; ai aj ak funct c0 c1 c2 c3

|    |    |    |   |          |          |  |  |
|----|----|----|---|----------|----------|--|--|
| 25 | 1  | 26 | 1 | 112.0200 | 625.7600 |  |  |
| 25 | 1  | 31 | 1 | 123.0200 | 568.3500 |  |  |
| 26 | 1  | 31 | 1 | 123.4500 | 560.9100 |  |  |
| 23 | 2  | 24 | 1 | 112.0200 | 625.7600 |  |  |
| 23 | 2  | 27 | 1 | 123.4500 | 560.9100 |  |  |
| 24 | 2  | 27 | 1 | 123.0200 | 568.3500 |  |  |
| 4  | 3  | 5  | 1 | 119.9700 | 562.1600 |  |  |
| 4  | 3  | 23 | 1 | 118.3400 | 587.5200 |  |  |
| 5  | 3  | 23 | 1 | 119.9700 | 562.1600 |  |  |
| 3  | 4  | 6  | 1 | 119.9700 | 562.1600 |  |  |
| 3  | 4  | 24 | 1 | 119.7200 | 586.9300 |  |  |
| 6  | 4  | 24 | 1 | 119.7200 | 586.9300 |  |  |
| 3  | 5  | 7  | 1 | 119.9700 | 562.1600 |  |  |
| 3  | 5  | 15 | 1 | 120.0100 | 405.5100 |  |  |
| 7  | 5  | 15 | 1 | 120.0100 | 405.5100 |  |  |
| 4  | 6  | 8  | 1 | 119.9700 | 562.1600 |  |  |
| 4  | 6  | 22 | 1 | 120.0100 | 405.5100 |  |  |
| 8  | 6  | 22 | 1 | 120.0100 | 405.5100 |  |  |
| 5  | 7  | 8  | 1 | 119.9700 | 562.1600 |  |  |
| 5  | 7  | 21 | 1 | 120.0100 | 405.5100 |  |  |
| 8  | 7  | 21 | 1 | 120.0100 | 405.5100 |  |  |
| 6  | 8  | 7  | 1 | 119.9700 | 562.1600 |  |  |
| 6  | 8  | 20 | 1 | 120.0100 | 405.5100 |  |  |
| 7  | 8  | 20 | 1 | 120.0100 | 405.5100 |  |  |
| 10 | 9  | 11 | 1 | 119.9700 | 562.1600 |  |  |
| 10 | 9  | 25 | 1 | 119.7200 | 586.9300 |  |  |
| 11 | 9  | 25 | 1 | 119.7200 | 586.9300 |  |  |
| 9  | 10 | 12 | 1 | 119.9700 | 562.1600 |  |  |
| 9  | 10 | 26 | 1 | 118.3400 | 587.5200 |  |  |
| 12 | 10 | 26 | 1 | 118.3400 | 587.5200 |  |  |
| 9  | 11 | 13 | 1 | 119.9700 | 562.1600 |  |  |
| 9  | 11 | 19 | 1 | 120.0100 | 405.5100 |  |  |
| 13 | 11 | 19 | 1 | 120.0100 | 405.5100 |  |  |
| 10 | 12 | 14 | 1 | 119.9700 | 562.1600 |  |  |
| 10 | 12 | 18 | 1 | 120.0100 | 405.5100 |  |  |
| 14 | 12 | 18 | 1 | 120.0100 | 405.5100 |  |  |
| 11 | 13 | 14 | 1 | 119.9700 | 562.1600 |  |  |
| 11 | 13 | 17 | 1 | 120.0100 | 405.5100 |  |  |
| 14 | 13 | 17 | 1 | 120.0100 | 405.5100 |  |  |
| 12 | 14 | 13 | 1 | 119.9700 | 562.1600 |  |  |
| 12 | 14 | 16 | 1 | 120.0100 | 405.5100 |  |  |
| 13 | 14 | 16 | 1 | 120.0100 | 405.5100 |  |  |
| 2  | 23 | 3  | 1 | 113.1500 | 572.8700 |  |  |
| 2  | 23 | 47 | 1 | 125.0900 | 523.5000 |  |  |
| 3  | 23 | 47 | 1 | 124.3600 | 528.4400 |  |  |
| 2  | 24 | 4  | 1 | 104.9400 | 606.0900 |  |  |
| 2  | 24 | 36 | 1 | 104.9400 | 606.0900 |  |  |
| 4  | 24 | 36 | 1 | 140.9600 | 167.3600 |  |  |
| 1  | 25 | 9  | 1 | 104.9400 | 606.0900 |  |  |
| 1  | 25 | 36 | 1 | 111.7800 | 167.3600 |  |  |
| 9  | 25 | 36 | 1 | 140.9600 | 167.3600 |  |  |
| 1  | 26 | 10 | 1 | 113.1500 | 572.8700 |  |  |
| 1  | 26 | 38 | 1 | 125.0900 | 523.5000 |  |  |
| 10 | 26 | 38 | 1 | 124.3600 | 528.4400 |  |  |
| 2  | 27 | 28 | 1 | 120.1000 | 552.2000 |  |  |
| 2  | 27 | 35 | 1 | 118.0200 | 578.9800 |  |  |
| 28 | 27 | 35 | 1 | 122.6300 | 578.7300 |  |  |
| 27 | 28 | 29 | 1 | 119.9700 | 562.1600 |  |  |
| 27 | 28 | 32 | 1 | 120.0100 | 405.5100 |  |  |
| 29 | 28 | 32 | 1 | 120.0100 | 405.5100 |  |  |
| 28 | 29 | 30 | 1 | 119.9700 | 562.1600 |  |  |
| 28 | 29 | 33 | 1 | 120.0100 | 405.5100 |  |  |

|    |    |    |   |          |          |
|----|----|----|---|----------|----------|
| 30 | 29 | 33 | 1 | 120.0100 | 405.5100 |
| 29 | 30 | 31 | 1 | 119.9700 | 562.1600 |
| 29 | 30 | 34 | 1 | 120.0100 | 405.5100 |
| 31 | 30 | 34 | 1 | 120.0100 | 405.5100 |
| 1  | 31 | 30 | 1 | 120.1000 | 552.2000 |
| 1  | 31 | 35 | 1 | 118.0200 | 578.9800 |
| 30 | 31 | 35 | 1 | 122.6300 | 578.7300 |
| 27 | 35 | 31 | 1 | 115.8600 | 573.9600 |
| 27 | 35 | 36 | 1 | 118.7800 | 167.3600 |
| 31 | 35 | 36 | 1 | 118.7800 | 167.3600 |
| 24 | 36 | 25 | 1 | 160.3400 | 351.4600 |
| 24 | 36 | 35 | 1 | 80.1700  | 351.4600 |
| 24 | 36 | 37 | 1 | 99.8300  | 962.3200 |
| 25 | 36 | 35 | 1 | 80.1700  | 351.4600 |
| 25 | 36 | 37 | 1 | 99.8300  | 962.3200 |
| 35 | 36 | 37 | 1 | 180.0000 | 962.3200 |
| 26 | 38 | 39 | 1 | 112.8100 | 550.0300 |
| 26 | 38 | 40 | 1 | 109.4500 | 417.5600 |
| 26 | 38 | 41 | 1 | 109.4500 | 417.5600 |
| 39 | 38 | 40 | 1 | 110.0700 | 387.9400 |
| 39 | 38 | 41 | 1 | 110.0700 | 387.9400 |
| 40 | 38 | 41 | 1 | 109.5500 | 327.8600 |
| 38 | 39 | 42 | 1 | 110.6300 | 528.9400 |
| 38 | 39 | 43 | 1 | 110.0500 | 388.0200 |
| 38 | 39 | 44 | 1 | 110.0500 | 388.0200 |
| 42 | 39 | 43 | 1 | 110.0500 | 388.0200 |
| 42 | 39 | 44 | 1 | 110.0500 | 388.0200 |
| 43 | 39 | 44 | 1 | 108.3500 | 329.9500 |
| 39 | 42 | 45 | 1 | 110.0700 | 387.9400 |
| 39 | 42 | 46 | 1 | 110.0700 | 387.9400 |
| 39 | 42 | 56 | 1 | 110.0000 | 527.0200 |
| 45 | 42 | 46 | 1 | 109.5500 | 327.8600 |
| 45 | 42 | 56 | 1 | 108.1100 | 367.0200 |
| 46 | 42 | 56 | 1 | 108.1100 | 367.0200 |
| 23 | 47 | 48 | 1 | 112.8100 | 550.0300 |
| 23 | 47 | 49 | 1 | 109.4500 | 417.5600 |
| 23 | 47 | 50 | 1 | 109.4500 | 417.5600 |
| 48 | 47 | 49 | 1 | 110.0700 | 387.9400 |
| 48 | 47 | 50 | 1 | 110.0700 | 387.9400 |
| 49 | 47 | 50 | 1 | 109.5500 | 327.8600 |
| 47 | 48 | 51 | 1 | 110.6300 | 528.9400 |
| 47 | 48 | 52 | 1 | 110.0500 | 388.0200 |
| 47 | 48 | 53 | 1 | 110.0500 | 388.0200 |
| 51 | 48 | 52 | 1 | 110.0500 | 388.0200 |
| 51 | 48 | 53 | 1 | 110.0500 | 388.0200 |
| 52 | 48 | 53 | 1 | 108.3500 | 329.9500 |
| 48 | 51 | 54 | 1 | 110.0700 | 387.9400 |
| 48 | 51 | 55 | 1 | 110.0700 | 387.9400 |
| 48 | 51 | 57 | 1 | 110.0000 | 527.0200 |
| 54 | 51 | 55 | 1 | 109.5500 | 327.8600 |
| 54 | 51 | 57 | 1 | 108.1100 | 367.0200 |
| 55 | 51 | 57 | 1 | 108.1100 | 367.0200 |
| 42 | 56 | 61 | 1 | 108.3200 | 557.2300 |
| 42 | 56 | 62 | 1 | 108.3200 | 557.2300 |
| 42 | 56 | 63 | 1 | 108.3200 | 557.2300 |
| 61 | 56 | 62 | 1 | 119.7300 | 624.0900 |
| 61 | 56 | 63 | 1 | 119.7300 | 624.0900 |
| 62 | 56 | 63 | 1 | 119.7300 | 624.0900 |
| 51 | 57 | 58 | 1 | 108.3200 | 557.2300 |
| 51 | 57 | 59 | 1 | 108.3200 | 557.2300 |
| 51 | 57 | 60 | 1 | 108.3200 | 557.2300 |
| 58 | 57 | 59 | 1 | 119.7300 | 624.0900 |
| 58 | 57 | 60 | 1 | 119.7300 | 624.0900 |
| 59 | 57 | 60 | 1 | 119.7300 | 624.0900 |

[ dihedrals ]

| ; | ai | aj | ak | al | funct | c0       | c1      | c2        | c3      | c4      | c5      |
|---|----|----|----|----|-------|----------|---------|-----------|---------|---------|---------|
|   | 26 | 1  | 25 | 9  | 3     | 39.74800 | 0.00000 | -39.74800 | 0.00000 | 0.00000 | 0.00000 |
|   | 26 | 1  | 25 | 36 | 3     | 39.74800 | 0.00000 | -39.74800 | 0.00000 | 0.00000 | 0.00000 |
|   | 31 | 1  | 25 | 9  | 3     | 39.74800 | 0.00000 | -39.74800 | 0.00000 | 0.00000 | 0.00000 |





|    |    |    |    |   |         |         |         |          |         |         |
|----|----|----|----|---|---------|---------|---------|----------|---------|---------|
| 26 | 38 | 39 | 43 | 3 | 0.65084 | 1.95253 | 0.00000 | -2.60338 | 0.00000 | 0.00000 |
| 26 | 38 | 39 | 44 | 3 | 0.65084 | 1.95253 | 0.00000 | -2.60338 | 0.00000 | 0.00000 |
| 40 | 38 | 39 | 42 | 3 | 0.65084 | 1.95253 | 0.00000 | -2.60338 | 0.00000 | 0.00000 |
| 40 | 38 | 39 | 43 | 3 | 0.65084 | 1.95253 | 0.00000 | -2.60338 | 0.00000 | 0.00000 |
| 40 | 38 | 39 | 44 | 3 | 0.65084 | 1.95253 | 0.00000 | -2.60338 | 0.00000 | 0.00000 |
| 41 | 38 | 39 | 42 | 3 | 0.65084 | 1.95253 | 0.00000 | -2.60338 | 0.00000 | 0.00000 |
| 41 | 38 | 39 | 43 | 3 | 0.65084 | 1.95253 | 0.00000 | -2.60338 | 0.00000 | 0.00000 |
| 41 | 38 | 39 | 44 | 3 | 0.65084 | 1.95253 | 0.00000 | -2.60338 | 0.00000 | 0.00000 |
| 38 | 39 | 42 | 45 | 3 | 0.65084 | 1.95253 | 0.00000 | -2.60338 | 0.00000 | 0.00000 |
| 38 | 39 | 42 | 46 | 3 | 0.65084 | 1.95253 | 0.00000 | -2.60338 | 0.00000 | 0.00000 |
| 38 | 39 | 42 | 56 | 3 | 0.65084 | 1.95253 | 0.00000 | -2.60338 | 0.00000 | 0.00000 |
| 43 | 39 | 42 | 45 | 3 | 0.65084 | 1.95253 | 0.00000 | -2.60338 | 0.00000 | 0.00000 |
| 43 | 39 | 42 | 46 | 3 | 0.65084 | 1.95253 | 0.00000 | -2.60338 | 0.00000 | 0.00000 |
| 43 | 39 | 42 | 56 | 3 | 0.65084 | 1.95253 | 0.00000 | -2.60338 | 0.00000 | 0.00000 |
| 44 | 39 | 42 | 45 | 3 | 0.65084 | 1.95253 | 0.00000 | -2.60338 | 0.00000 | 0.00000 |
| 44 | 39 | 42 | 46 | 3 | 0.65084 | 1.95253 | 0.00000 | -2.60338 | 0.00000 | 0.00000 |
| 44 | 39 | 42 | 56 | 3 | 0.65084 | 1.95253 | 0.00000 | -2.60338 | 0.00000 | 0.00000 |
| 39 | 42 | 56 | 61 | 3 | 0.60436 | 1.81307 | 0.00000 | -2.41742 | 0.00000 | 0.00000 |
| 39 | 42 | 56 | 62 | 3 | 0.60436 | 1.81307 | 0.00000 | -2.41742 | 0.00000 | 0.00000 |
| 39 | 42 | 56 | 63 | 3 | 0.60436 | 1.81307 | 0.00000 | -2.41742 | 0.00000 | 0.00000 |
| 45 | 42 | 56 | 61 | 3 | 0.60436 | 1.81307 | 0.00000 | -2.41742 | 0.00000 | 0.00000 |
| 45 | 42 | 56 | 62 | 3 | 0.60436 | 1.81307 | 0.00000 | -2.41742 | 0.00000 | 0.00000 |
| 45 | 42 | 56 | 63 | 3 | 0.60436 | 1.81307 | 0.00000 | -2.41742 | 0.00000 | 0.00000 |
| 46 | 42 | 56 | 61 | 3 | 0.60436 | 1.81307 | 0.00000 | -2.41742 | 0.00000 | 0.00000 |
| 46 | 42 | 56 | 62 | 3 | 0.60436 | 1.81307 | 0.00000 | -2.41742 | 0.00000 | 0.00000 |
| 46 | 42 | 56 | 63 | 3 | 0.60436 | 1.81307 | 0.00000 | -2.41742 | 0.00000 | 0.00000 |
| 23 | 47 | 48 | 51 | 3 | 0.65084 | 1.95253 | 0.00000 | -2.60338 | 0.00000 | 0.00000 |
| 23 | 47 | 48 | 52 | 3 | 0.65084 | 1.95253 | 0.00000 | -2.60338 | 0.00000 | 0.00000 |
| 23 | 47 | 48 | 53 | 3 | 0.65084 | 1.95253 | 0.00000 | -2.60338 | 0.00000 | 0.00000 |
| 49 | 47 | 48 | 51 | 3 | 0.65084 | 1.95253 | 0.00000 | -2.60338 | 0.00000 | 0.00000 |
| 49 | 47 | 48 | 52 | 3 | 0.65084 | 1.95253 | 0.00000 | -2.60338 | 0.00000 | 0.00000 |
| 49 | 47 | 48 | 53 | 3 | 0.65084 | 1.95253 | 0.00000 | -2.60338 | 0.00000 | 0.00000 |
| 50 | 47 | 48 | 51 | 3 | 0.65084 | 1.95253 | 0.00000 | -2.60338 | 0.00000 | 0.00000 |
| 50 | 47 | 48 | 52 | 3 | 0.65084 | 1.95253 | 0.00000 | -2.60338 | 0.00000 | 0.00000 |
| 50 | 47 | 48 | 53 | 3 | 0.65084 | 1.95253 | 0.00000 | -2.60338 | 0.00000 | 0.00000 |
| 47 | 48 | 51 | 54 | 3 | 0.65084 | 1.95253 | 0.00000 | -2.60338 | 0.00000 | 0.00000 |
| 47 | 48 | 51 | 55 | 3 | 0.65084 | 1.95253 | 0.00000 | -2.60338 | 0.00000 | 0.00000 |
| 47 | 48 | 51 | 57 | 3 | 0.65084 | 1.95253 | 0.00000 | -2.60338 | 0.00000 | 0.00000 |
| 52 | 48 | 51 | 54 | 3 | 0.65084 | 1.95253 | 0.00000 | -2.60338 | 0.00000 | 0.00000 |
| 52 | 48 | 51 | 55 | 3 | 0.65084 | 1.95253 | 0.00000 | -2.60338 | 0.00000 | 0.00000 |
| 52 | 48 | 51 | 57 | 3 | 0.65084 | 1.95253 | 0.00000 | -2.60338 | 0.00000 | 0.00000 |
| 53 | 48 | 51 | 54 | 3 | 0.65084 | 1.95253 | 0.00000 | -2.60338 | 0.00000 | 0.00000 |
| 53 | 48 | 51 | 55 | 3 | 0.65084 | 1.95253 | 0.00000 | -2.60338 | 0.00000 | 0.00000 |
| 53 | 48 | 51 | 57 | 3 | 0.65084 | 1.95253 | 0.00000 | -2.60338 | 0.00000 | 0.00000 |
| 48 | 51 | 57 | 58 | 3 | 0.60436 | 1.81307 | 0.00000 | -2.41742 | 0.00000 | 0.00000 |
| 48 | 51 | 57 | 59 | 3 | 0.60436 | 1.81307 | 0.00000 | -2.41742 | 0.00000 | 0.00000 |
| 48 | 51 | 57 | 60 | 3 | 0.60436 | 1.81307 | 0.00000 | -2.41742 | 0.00000 | 0.00000 |
| 54 | 51 | 57 | 58 | 3 | 0.60436 | 1.81307 | 0.00000 | -2.41742 | 0.00000 | 0.00000 |
| 54 | 51 | 57 | 59 | 3 | 0.60436 | 1.81307 | 0.00000 | -2.41742 | 0.00000 | 0.00000 |
| 54 | 51 | 57 | 60 | 3 | 0.60436 | 1.81307 | 0.00000 | -2.41742 | 0.00000 | 0.00000 |
| 55 | 51 | 57 | 58 | 3 | 0.60436 | 1.81307 | 0.00000 | -2.41742 | 0.00000 | 0.00000 |
| 55 | 51 | 57 | 59 | 3 | 0.60436 | 1.81307 | 0.00000 | -2.41742 | 0.00000 | 0.00000 |
| 55 | 51 | 57 | 60 | 3 | 0.60436 | 1.81307 | 0.00000 | -2.41742 | 0.00000 | 0.00000 |

[ dihedrals ]

| ; ai | aj | ak | al | funct | c0     | c1      | c2 | c3 |
|------|----|----|----|-------|--------|---------|----|----|
| 1    | 26 | 10 | 38 | 1     | 180.00 | 4.60240 | 2  |    |
| 2    | 23 | 3  | 47 | 1     | 180.00 | 4.60240 | 2  |    |
| 3    | 7  | 5  | 15 | 1     | 180.00 | 4.60240 | 2  |    |
| 3    | 6  | 4  | 24 | 1     | 180.00 | 4.60240 | 2  |    |
| 4    | 8  | 6  | 22 | 1     | 180.00 | 4.60240 | 2  |    |
| 4    | 5  | 3  | 23 | 1     | 180.00 | 4.60240 | 2  |    |
| 5    | 8  | 7  | 21 | 1     | 180.00 | 4.60240 | 2  |    |
| 6    | 7  | 8  | 20 | 1     | 180.00 | 4.60240 | 2  |    |
| 9    | 13 | 11 | 19 | 1     | 180.00 | 4.60240 | 2  |    |
| 9    | 12 | 10 | 26 | 1     | 180.00 | 4.60240 | 2  |    |
| 10   | 14 | 12 | 18 | 1     | 180.00 | 4.60240 | 2  |    |
| 10   | 11 | 9  | 25 | 1     | 180.00 | 4.60240 | 2  |    |
| 11   | 14 | 13 | 17 | 1     | 180.00 | 4.60240 | 2  |    |
| 12   | 13 | 14 | 16 | 1     | 180.00 | 4.60240 | 2  |    |

|    |    |    |    |   |        |         |   |
|----|----|----|----|---|--------|---------|---|
| 24 | 2  | 23 | 27 | 1 | 180.00 | 4.60240 | 2 |
| 25 | 1  | 26 | 31 | 1 | 180.00 | 4.60240 | 2 |
| 27 | 29 | 28 | 32 | 1 | 180.00 | 4.60240 | 2 |
| 28 | 30 | 29 | 33 | 1 | 180.00 | 4.60240 | 2 |
| 28 | 2  | 27 | 35 | 1 | 180.00 | 4.60240 | 2 |
| 29 | 31 | 30 | 34 | 1 | 180.00 | 4.60240 | 2 |
| 30 | 1  | 31 | 35 | 1 | 180.00 | 4.60240 | 2 |

[ system ]

; Name

PtsB

[ molecules ]

; Compound #mols

PtsB 1

**Table S10.** Force field parameters of PtB-a system in GROMACS format used in this work.

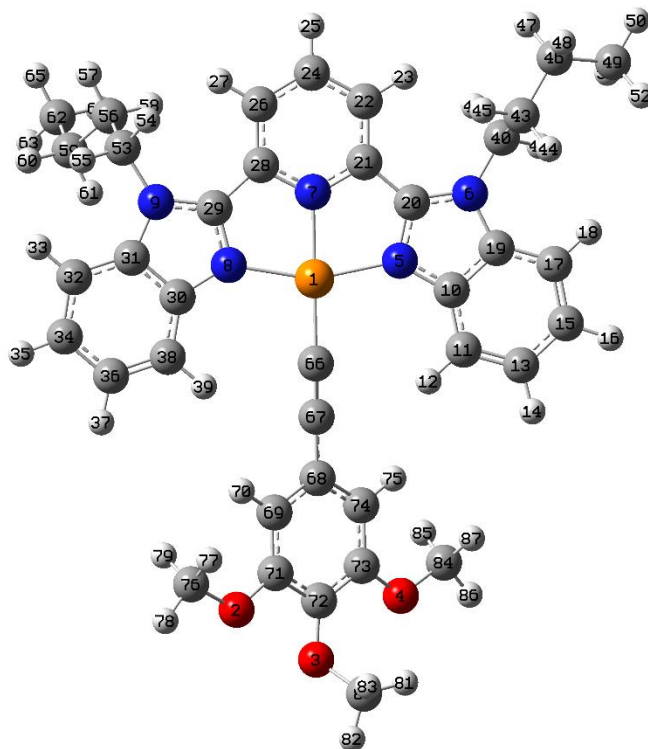

### **;PtB-a force field parameters**

#### **;PtB-a\_GMX.top**

[ defaults ]

```
; nbfunc      comb-rule  gen-pairs  fudgeLJ  fudgeQQ
1             2          yes         0.5      0.8333
```

[ atomtypes ]

```
; name  at.num  mass  charge  ptype  sigma  epsilon
PTC_Pt  78      195.078  0.0000  A      3.3298e-01  1.0534e+01
PTC_os  8        16.00   0.0000  A      3.00001e-01  7.11280e-01
PTC_nc  7         14.01   0.0000  A      3.25000e-01  7.11280e-01
PTC_na  7         14.01   0.0000  A      3.25000e-01  7.11280e-01
PTC_nb  7         14.01   0.0000  A      3.25000e-01  7.11280e-01
PTC_ca  6         12.01   0.0000  A      3.39967e-01  3.59824e-01
PTC_ha  1         1.008   0.0000  A      2.59964e-01  6.27600e-02
PTC_cd  6         12.01   0.0000  A      3.39967e-01  3.59824e-01
PTC_c3  6         12.01   0.0000  A      3.39967e-01  4.57730e-01
PTC_h1  1         1.008   0.0000  A      2.47135e-01  6.56888e-02
PTC_hc  1         1.008   0.0000  A      2.64953e-01  6.56888e-02
PTC_c1  6         12.01   0.0000  A      3.39967e-01  8.78640e-01
PTC_cg  6         12.01   0.0000  A      3.39967e-01  8.78640e-01
```

[ moleculetype ]

```
; Name      nrexcl
PtB-a       3
```

[ atoms ]

```
; nr  type  resnr  residue  atom  cgnr  charge  mass  typeB  chargeB  massB
; residue 1 PTC rtp PTC q +1.0
  1  PTC_Pt  1  PTC  PT1  1  -0.201109  195.078; qtot -0.2011
  2  PTC_os  1  PTC  O1  2  -0.2164  16.00 ; qtot -0.4175
  3  PTC_os  1  PTC  O2  3  -0.249979  16.00 ; qtot -0.6675
  4  PTC_os  1  PTC  O3  4  -0.2164  16.00 ; qtot -0.8839
  5  PTC_nc  1  PTC  N1  5  0.044289  14.01 ; qtot -0.8396
  6  PTC_na  1  PTC  N2  6  -0.408905  14.01 ; qtot -1.249
  7  PTC_nb  1  PTC  N3  7  -0.04731  14.01 ; qtot -1.296
  8  PTC_nc  1  PTC  N4  8  0.044289  14.01 ; qtot -1.252
  9  PTC_na  1  PTC  N5  9  -0.408905  14.01 ; qtot -1.66
 10  PTC_ca  1  PTC  C1 10  0.148116  12.01 ; qtot -1.512
```

|    |        |   |     |     |    |           |       |                 |
|----|--------|---|-----|-----|----|-----------|-------|-----------------|
| 11 | PTC_ca | 1 | PTC | C2  | 11 | -0.217522 | 12.01 | ; qtot -1.73    |
| 12 | PTC_ha | 1 | PTC | H1  | 12 | 0.1958    | 1.008 | ; qtot -1.534   |
| 13 | PTC_ca | 1 | PTC | C3  | 13 | -0.106842 | 12.01 | ; qtot -1.641   |
| 14 | PTC_ha | 1 | PTC | H2  | 14 | 0.153899  | 1.008 | ; qtot -1.487   |
| 15 | PTC_ca | 1 | PTC | C4  | 15 | -0.076146 | 12.01 | ; qtot -1.563   |
| 16 | PTC_ha | 1 | PTC | H3  | 16 | 0.151311  | 1.008 | ; qtot -1.412   |
| 17 | PTC_ca | 1 | PTC | C5  | 17 | -0.280998 | 12.01 | ; qtot -1.693   |
| 18 | PTC_ha | 1 | PTC | H4  | 18 | 0.184387  | 1.008 | ; qtot -1.508   |
| 19 | PTC_ca | 1 | PTC | C6  | 19 | 0.250779  | 12.01 | ; qtot -1.258   |
| 20 | PTC_cd | 1 | PTC | C7  | 20 | 0.081892  | 12.01 | ; qtot -1.176   |
| 21 | PTC_ca | 1 | PTC | C8  | 21 | 0.250755  | 12.01 | ; qtot -0.925   |
| 22 | PTC_ca | 1 | PTC | C9  | 22 | -0.277609 | 12.01 | ; qtot -1.203   |
| 23 | PTC_ha | 1 | PTC | H5  | 23 | 0.183021  | 1.008 | ; qtot -1.02    |
| 24 | PTC_ca | 1 | PTC | C10 | 24 | 0.006689  | 12.01 | ; qtot -1.013   |
| 25 | PTC_ha | 1 | PTC | H6  | 25 | 0.157288  | 1.008 | ; qtot -0.8556  |
| 26 | PTC_ca | 1 | PTC | C11 | 26 | -0.277609 | 12.01 | ; qtot -1.133   |
| 27 | PTC_ha | 1 | PTC | H7  | 27 | 0.183021  | 1.008 | ; qtot -0.9502  |
| 28 | PTC_ca | 1 | PTC | C12 | 28 | 0.250755  | 12.01 | ; qtot -0.6994  |
| 29 | PTC_cd | 1 | PTC | C13 | 29 | 0.081892  | 12.01 | ; qtot -0.6176  |
| 30 | PTC_ca | 1 | PTC | C14 | 30 | 0.148116  | 12.01 | ; qtot -0.4694  |
| 31 | PTC_ca | 1 | PTC | C15 | 31 | 0.250779  | 12.01 | ; qtot -0.2187  |
| 32 | PTC_ca | 1 | PTC | C16 | 32 | -0.280998 | 12.01 | ; qtot -0.4997  |
| 33 | PTC_ha | 1 | PTC | H8  | 33 | 0.184387  | 1.008 | ; qtot -0.3153  |
| 34 | PTC_ca | 1 | PTC | C17 | 34 | -0.076146 | 12.01 | ; qtot -0.3914  |
| 35 | PTC_ha | 1 | PTC | H9  | 35 | 0.151311  | 1.008 | ; qtot -0.2401  |
| 36 | PTC_ca | 1 | PTC | C18 | 36 | -0.106842 | 12.01 | ; qtot -0.3469  |
| 37 | PTC_ha | 1 | PTC | H10 | 37 | 0.153899  | 1.008 | ; qtot -0.193   |
| 38 | PTC_ca | 1 | PTC | C19 | 38 | -0.217522 | 12.01 | ; qtot -0.4106  |
| 39 | PTC_ha | 1 | PTC | H11 | 39 | 0.1958    | 1.008 | ; qtot -0.2148  |
| 40 | PTC_c3 | 1 | PTC | C20 | 40 | 0.374263  | 12.01 | ; qtot 0.1595   |
| 41 | PTC_h1 | 1 | PTC | H12 | 41 | -0.010174 | 1.008 | ; qtot 0.1493   |
| 42 | PTC_h1 | 1 | PTC | H13 | 42 | -0.010174 | 1.008 | ; qtot 0.1391   |
| 43 | PTC_c3 | 1 | PTC | C21 | 43 | -0.248219 | 12.01 | ; qtot -0.1091  |
| 44 | PTC_hc | 1 | PTC | H14 | 44 | 0.057939  | 1.008 | ; qtot -0.05113 |
| 45 | PTC_hc | 1 | PTC | H15 | 45 | 0.057939  | 1.008 | ; qtot 0.006807 |
| 46 | PTC_c3 | 1 | PTC | C22 | 46 | 0.247039  | 12.01 | ; qtot 0.2538   |
| 47 | PTC_hc | 1 | PTC | H16 | 47 | -0.038393 | 1.008 | ; qtot 0.2155   |
| 48 | PTC_hc | 1 | PTC | H17 | 48 | -0.038393 | 1.008 | ; qtot 0.1771   |
| 49 | PTC_c3 | 1 | PTC | C23 | 49 | -0.169898 | 12.01 | ; qtot 0.007162 |
| 50 | PTC_hc | 1 | PTC | H18 | 50 | 0.042932  | 1.008 | ; qtot 0.05009  |
| 51 | PTC_hc | 1 | PTC | H19 | 51 | 0.042932  | 1.008 | ; qtot 0.09303  |
| 52 | PTC_hc | 1 | PTC | H20 | 52 | 0.042932  | 1.008 | ; qtot 0.136    |
| 53 | PTC_c3 | 1 | PTC | C24 | 53 | 0.374263  | 12.01 | ; qtot 0.5102   |
| 54 | PTC_h1 | 1 | PTC | H21 | 54 | -0.010174 | 1.008 | ; qtot 0.5      |
| 55 | PTC_h1 | 1 | PTC | H22 | 55 | -0.010174 | 1.008 | ; qtot 0.4899   |
| 56 | PTC_c3 | 1 | PTC | C25 | 56 | -0.248219 | 12.01 | ; qtot 0.2417   |
| 57 | PTC_hc | 1 | PTC | H23 | 57 | 0.057939  | 1.008 | ; qtot 0.2996   |
| 58 | PTC_hc | 1 | PTC | H24 | 58 | 0.057939  | 1.008 | ; qtot 0.3575   |
| 59 | PTC_c3 | 1 | PTC | C26 | 59 | 0.247039  | 12.01 | ; qtot 0.6046   |
| 60 | PTC_hc | 1 | PTC | H25 | 60 | -0.038393 | 1.008 | ; qtot 0.5662   |
| 61 | PTC_hc | 1 | PTC | H26 | 61 | -0.038393 | 1.008 | ; qtot 0.5278   |
| 62 | PTC_c3 | 1 | PTC | C27 | 62 | -0.169898 | 12.01 | ; qtot 0.3579   |
| 63 | PTC_hc | 1 | PTC | H27 | 63 | 0.042932  | 1.008 | ; qtot 0.4008   |
| 64 | PTC_hc | 1 | PTC | H28 | 64 | 0.042932  | 1.008 | ; qtot 0.4438   |
| 65 | PTC_hc | 1 | PTC | H29 | 65 | 0.042932  | 1.008 | ; qtot 0.4867   |
| 66 | PTC_c1 | 1 | PTC | C28 | 66 | -0.269551 | 12.01 | ; qtot 0.2171   |
| 67 | PTC_cg | 1 | PTC | C29 | 67 | -0.004993 | 12.01 | ; qtot 0.2121   |
| 68 | PTC_ca | 1 | PTC | C30 | 68 | 0.055008  | 12.01 | ; qtot 0.2671   |
| 69 | PTC_ca | 1 | PTC | C31 | 69 | -0.30574  | 12.01 | ; qtot -0.03859 |
| 70 | PTC_ha | 1 | PTC | H30 | 70 | 0.126839  | 1.008 | ; qtot 0.08825  |
| 71 | PTC_ca | 1 | PTC | C32 | 71 | 0.325435  | 12.01 | ; qtot 0.4137   |
| 72 | PTC_ca | 1 | PTC | C33 | 72 | -0.047993 | 12.01 | ; qtot 0.3657   |
| 73 | PTC_ca | 1 | PTC | C34 | 73 | 0.325435  | 12.01 | ; qtot 0.6911   |
| 74 | PTC_ca | 1 | PTC | C35 | 74 | -0.30574  | 12.01 | ; qtot 0.3854   |
| 75 | PTC_ha | 1 | PTC | H31 | 75 | 0.126839  | 1.008 | ; qtot 0.5122   |
| 76 | PTC_c3 | 1 | PTC | C36 | 76 | -0.021785 | 12.01 | ; qtot 0.4904   |
| 77 | PTC_h1 | 1 | PTC | H32 | 77 | 0.057304  | 1.008 | ; qtot 0.5477   |
| 78 | PTC_h1 | 1 | PTC | H33 | 78 | 0.057304  | 1.008 | ; qtot 0.605    |
| 79 | PTC_h1 | 1 | PTC | H34 | 79 | 0.057304  | 1.008 | ; qtot 0.6623   |
| 80 | PTC_c3 | 1 | PTC | C37 | 80 | -0.049849 | 12.01 | ; qtot 0.6125   |



|    |        |   |     |     |    |           |       |               |
|----|--------|---|-----|-----|----|-----------|-------|---------------|
| 81 | PTC_h1 | 1 | PTC | H35 | 81 | 0.079124  | 1.008 | ; qtot 0.6916 |
| 82 | PTC_h1 | 1 | PTC | H36 | 82 | 0.079124  | 1.008 | ; qtot 0.7707 |
| 83 | PTC_h1 | 1 | PTC | H37 | 83 | 0.079124  | 1.008 | ; qtot 0.8499 |
| 84 | PTC_c3 | 1 | PTC | C38 | 84 | -0.021785 | 12.01 | ; qtot 0.8281 |
| 85 | PTC_h1 | 1 | PTC | H38 | 85 | 0.057304  | 1.008 | ; qtot 0.8854 |
| 86 | PTC_h1 | 1 | PTC | H39 | 86 | 0.057304  | 1.008 | ; qtot 0.9427 |
| 87 | PTC_h1 | 1 | PTC | H40 | 87 | 0.057304  | 1.008 | ; qtot 1      |

[ bonds ]

| ; ai | aj | funct | c0      | c1       | c2 | c3 |
|------|----|-------|---------|----------|----|----|
| 1    | 5  | 1     | 0.20101 | 306270.0 |    |    |
| 1    | 7  | 1     | 0.19961 | 306270.0 |    |    |
| 1    | 8  | 1     | 0.20101 | 306270.0 |    |    |
| 1    | 66 | 1     | 0.19492 | 306270.0 |    |    |
| 2    | 71 | 1     | 0.13730 | 311620.0 |    |    |
| 2    | 76 | 1     | 0.14390 | 252300.0 |    |    |
| 3    | 72 | 1     | 0.13730 | 311620.0 |    |    |
| 3    | 80 | 1     | 0.14390 | 252300.0 |    |    |
| 4    | 73 | 1     | 0.13730 | 311620.0 |    |    |
| 4    | 84 | 1     | 0.14390 | 252300.0 |    |    |
| 5    | 10 | 1     | 0.13360 | 412460.0 |    |    |
| 5    | 20 | 1     | 0.13350 | 413880.0 |    |    |
| 6    | 19 | 1     | 0.13500 | 393550.0 |    |    |
| 6    | 20 | 1     | 0.13710 | 367190.0 |    |    |
| 6    | 40 | 1     | 0.14560 | 280080.0 |    |    |
| 7    | 21 | 1     | 0.13420 | 404260.0 |    |    |
| 7    | 28 | 1     | 0.13420 | 404260.0 |    |    |
| 8    | 29 | 1     | 0.13350 | 413880.0 |    |    |
| 8    | 30 | 1     | 0.13360 | 412460.0 |    |    |
| 9    | 29 | 1     | 0.13710 | 367190.0 |    |    |
| 9    | 31 | 1     | 0.13500 | 393550.0 |    |    |
| 9    | 53 | 1     | 0.14560 | 280080.0 |    |    |
| 10   | 11 | 1     | 0.13870 | 400330.0 |    |    |
| 10   | 19 | 1     | 0.13870 | 400330.0 |    |    |
| 11   | 12 | 1     | 0.10870 | 288110.0 |    |    |
| 11   | 13 | 1     | 0.13870 | 400330.0 |    |    |
| 13   | 14 | 1     | 0.10870 | 288110.0 |    |    |
| 13   | 15 | 1     | 0.13870 | 400330.0 |    |    |
| 15   | 16 | 1     | 0.10870 | 288110.0 |    |    |
| 15   | 17 | 1     | 0.13870 | 400330.0 |    |    |
| 17   | 18 | 1     | 0.10870 | 288110.0 |    |    |
| 17   | 19 | 1     | 0.13870 | 400330.0 |    |    |
| 20   | 21 | 1     | 0.14340 | 344510.0 |    |    |
| 21   | 22 | 1     | 0.13870 | 400330.0 |    |    |
| 22   | 23 | 1     | 0.10870 | 288110.0 |    |    |
| 22   | 24 | 1     | 0.13870 | 400330.0 |    |    |
| 24   | 25 | 1     | 0.10870 | 288110.0 |    |    |
| 24   | 26 | 1     | 0.13870 | 400330.0 |    |    |
| 26   | 27 | 1     | 0.10870 | 288110.0 |    |    |
| 26   | 28 | 1     | 0.13870 | 400330.0 |    |    |
| 28   | 29 | 1     | 0.14340 | 344510.0 |    |    |
| 30   | 31 | 1     | 0.13870 | 400330.0 |    |    |
| 30   | 38 | 1     | 0.13870 | 400330.0 |    |    |
| 31   | 32 | 1     | 0.13870 | 400330.0 |    |    |
| 32   | 33 | 1     | 0.10870 | 288110.0 |    |    |
| 32   | 34 | 1     | 0.13870 | 400330.0 |    |    |
| 34   | 35 | 1     | 0.10870 | 288110.0 |    |    |
| 34   | 36 | 1     | 0.13870 | 400330.0 |    |    |
| 36   | 37 | 1     | 0.10870 | 288110.0 |    |    |
| 36   | 38 | 1     | 0.13870 | 400330.0 |    |    |
| 38   | 39 | 1     | 0.10870 | 288110.0 |    |    |
| 40   | 41 | 1     | 0.10930 | 281080.0 |    |    |
| 40   | 42 | 1     | 0.10930 | 281080.0 |    |    |
| 40   | 43 | 1     | 0.15350 | 253630.0 |    |    |
| 43   | 44 | 1     | 0.10920 | 282250.0 |    |    |
| 43   | 45 | 1     | 0.10920 | 282250.0 |    |    |
| 43   | 46 | 1     | 0.15350 | 253630.0 |    |    |
| 46   | 47 | 1     | 0.10920 | 282250.0 |    |    |
| 46   | 48 | 1     | 0.10920 | 282250.0 |    |    |
| 46   | 49 | 1     | 0.15350 | 253630.0 |    |    |

|    |    |   |         |          |
|----|----|---|---------|----------|
| 49 | 50 | 1 | 0.10920 | 282250.0 |
| 49 | 51 | 1 | 0.10920 | 282250.0 |
| 49 | 52 | 1 | 0.10920 | 282250.0 |
| 53 | 54 | 1 | 0.10930 | 281080.0 |
| 53 | 55 | 1 | 0.10930 | 281080.0 |
| 53 | 56 | 1 | 0.15350 | 253630.0 |
| 56 | 57 | 1 | 0.10920 | 282250.0 |
| 56 | 58 | 1 | 0.10920 | 282250.0 |
| 56 | 59 | 1 | 0.15350 | 253630.0 |
| 59 | 60 | 1 | 0.10920 | 282250.0 |
| 59 | 61 | 1 | 0.10920 | 282250.0 |
| 59 | 62 | 1 | 0.15350 | 253630.0 |
| 62 | 63 | 1 | 0.10920 | 282250.0 |
| 62 | 64 | 1 | 0.10920 | 282250.0 |
| 62 | 65 | 1 | 0.10920 | 282250.0 |
| 66 | 67 | 1 | 0.12220 | 707770.0 |
| 67 | 68 | 1 | 0.14380 | 340240.0 |
| 68 | 69 | 1 | 0.13870 | 400330.0 |
| 68 | 74 | 1 | 0.13870 | 400330.0 |
| 69 | 70 | 1 | 0.10870 | 288110.0 |
| 69 | 71 | 1 | 0.13870 | 400330.0 |
| 71 | 72 | 1 | 0.13870 | 400330.0 |
| 72 | 73 | 1 | 0.13870 | 400330.0 |
| 73 | 74 | 1 | 0.13870 | 400330.0 |
| 74 | 75 | 1 | 0.10870 | 288110.0 |
| 76 | 77 | 1 | 0.10930 | 281080.0 |
| 76 | 78 | 1 | 0.10930 | 281080.0 |
| 76 | 79 | 1 | 0.10930 | 281080.0 |
| 80 | 81 | 1 | 0.10930 | 281080.0 |
| 80 | 82 | 1 | 0.10930 | 281080.0 |
| 80 | 83 | 1 | 0.10930 | 281080.0 |
| 84 | 85 | 1 | 0.10930 | 281080.0 |
| 84 | 86 | 1 | 0.10930 | 281080.0 |
| 84 | 87 | 1 | 0.10930 | 281080.0 |

[ pairs ]

| ; ai | aj | funct | c0 | c1 | c2 | c3 |
|------|----|-------|----|----|----|----|
| 1    | 6  | 1     |    |    |    |    |
| 1    | 9  | 1     |    |    |    |    |
| 1    | 11 | 1     |    |    |    |    |
| 1    | 19 | 1     |    |    |    |    |
| 1    | 22 | 1     |    |    |    |    |
| 1    | 26 | 1     |    |    |    |    |
| 1    | 31 | 1     |    |    |    |    |
| 1    | 38 | 1     |    |    |    |    |
| 1    | 68 | 1     |    |    |    |    |
| 2    | 3  | 1     |    |    |    |    |
| 2    | 68 | 1     |    |    |    |    |
| 2    | 70 | 1     |    |    |    |    |
| 2    | 73 | 1     |    |    |    |    |
| 3    | 4  | 1     |    |    |    |    |
| 3    | 69 | 1     |    |    |    |    |
| 3    | 74 | 1     |    |    |    |    |
| 4    | 68 | 1     |    |    |    |    |
| 4    | 71 | 1     |    |    |    |    |
| 4    | 75 | 1     |    |    |    |    |
| 5    | 12 | 1     |    |    |    |    |
| 5    | 13 | 1     |    |    |    |    |
| 5    | 17 | 1     |    |    |    |    |
| 5    | 22 | 1     |    |    |    |    |
| 5    | 28 | 1     |    |    |    |    |
| 5    | 29 | 1     |    |    |    |    |
| 5    | 30 | 1     |    |    |    |    |
| 5    | 40 | 1     |    |    |    |    |
| 5    | 67 | 1     |    |    |    |    |
| 6    | 7  | 1     |    |    |    |    |
| 6    | 11 | 1     |    |    |    |    |
| 6    | 15 | 1     |    |    |    |    |
| 6    | 18 | 1     |    |    |    |    |
| 6    | 22 | 1     |    |    |    |    |

6 44 1  
6 45 1  
6 46 1  
7 9 1  
7 10 1  
7 23 1  
7 24 1  
7 27 1  
7 30 1  
7 67 1  
8 10 1  
8 20 1  
8 21 1  
8 26 1  
8 32 1  
8 36 1  
8 39 1  
8 53 1  
8 67 1  
9 26 1  
9 33 1  
9 34 1  
9 38 1  
9 57 1  
9 58 1  
9 59 1  
10 14 1  
10 15 1  
10 18 1  
10 21 1  
10 40 1  
10 66 1  
11 16 1  
11 17 1  
11 20 1  
12 14 1  
12 15 1  
12 19 1  
13 18 1  
13 19 1  
14 16 1  
14 17 1  
16 18 1  
16 19 1  
17 20 1  
17 40 1  
19 21 1  
19 41 1  
19 42 1  
19 43 1  
20 23 1  
20 24 1  
20 28 1  
20 41 1  
20 42 1  
20 43 1  
20 66 1  
21 25 1  
21 26 1  
21 29 1  
21 40 1  
21 66 1  
22 27 1  
22 28 1  
23 25 1  
23 26 1  
24 29 1  
25 27 1  
25 28 1  
27 29 1

28 30 1  
28 31 1  
28 53 1  
28 66 1  
29 32 1  
29 38 1  
29 54 1  
29 55 1  
29 56 1  
29 66 1  
30 33 1  
30 34 1  
30 37 1  
30 53 1  
30 66 1  
31 35 1  
31 36 1  
31 39 1  
31 54 1  
31 55 1  
31 56 1  
32 37 1  
32 38 1  
32 53 1  
33 35 1  
33 36 1  
34 39 1  
35 37 1  
35 38 1  
37 39 1  
40 47 1  
40 48 1  
40 49 1  
41 44 1  
41 45 1  
41 46 1  
42 44 1  
42 45 1  
42 46 1  
43 50 1  
43 51 1  
43 52 1  
44 47 1  
44 48 1  
44 49 1  
45 47 1  
45 48 1  
45 49 1  
47 50 1  
47 51 1  
47 52 1  
48 50 1  
48 51 1  
48 52 1  
53 60 1  
53 61 1  
53 62 1  
54 57 1  
54 58 1  
54 59 1  
55 57 1  
55 58 1  
55 59 1  
56 63 1  
56 64 1  
56 65 1  
57 60 1  
57 61 1  
57 62 1  
58 60 1

58 61 1  
 58 62 1  
 60 63 1  
 60 64 1  
 60 65 1  
 61 63 1  
 61 64 1  
 61 65 1  
 66 69 1  
 66 74 1  
 67 70 1  
 67 71 1  
 67 73 1  
 67 75 1  
 68 72 1  
 69 73 1  
 69 75 1  
 69 76 1  
 70 72 1  
 70 74 1  
 71 74 1  
 71 77 1  
 71 78 1  
 71 79 1  
 71 80 1  
 72 75 1  
 72 76 1  
 72 81 1  
 72 82 1  
 72 83 1  
 72 84 1  
 73 80 1  
 73 85 1  
 73 86 1  
 73 87 1  
 74 84 1

[ angles ]

| ; ai | aj | ak | funct | c0       | c1       | c2 | c3 |
|------|----|----|-------|----------|----------|----|----|
| 5    | 1  | 7  | 1     | 79.5643  | 351.4600 |    |    |
| 5    | 1  | 8  | 1     | 159.385  | 351.4600 |    |    |
| 5    | 1  | 66 | 1     | 99.8300  | 962.3200 |    |    |
| 7    | 1  | 8  | 1     | 79.5643  | 351.4600 |    |    |
| 7    | 1  | 66 | 1     | 180.0000 | 962.3200 |    |    |
| 8    | 1  | 66 | 1     | 99.8300  | 962.3200 |    |    |
| 71   | 2  | 76 | 1     | 124.3600 | 528.4400 |    |    |
| 72   | 3  | 80 | 1     | 117.9700 | 521.0800 |    |    |
| 73   | 4  | 84 | 1     | 117.9700 | 521.0800 |    |    |
| 1    | 5  | 10 | 1     | 140.6420 | 167.3600 |    |    |
| 1    | 5  | 20 | 1     | 113.4881 | 167.3600 |    |    |
| 10   | 5  | 20 | 1     | 104.9400 | 606.0900 |    |    |
| 19   | 6  | 20 | 1     | 113.1500 | 572.8700 |    |    |
| 19   | 6  | 40 | 1     | 124.3600 | 528.4400 |    |    |
| 20   | 6  | 40 | 1     | 125.0900 | 523.5000 |    |    |
| 1    | 7  | 21 | 1     | 120.4944 | 167.3600 |    |    |
| 1    | 7  | 28 | 1     | 120.4944 | 167.3600 |    |    |
| 21   | 7  | 28 | 1     | 115.8600 | 573.9600 |    |    |
| 1    | 8  | 29 | 1     | 113.4881 | 167.3600 |    |    |
| 1    | 8  | 30 | 1     | 140.6420 | 167.3600 |    |    |
| 29   | 8  | 30 | 1     | 104.9400 | 606.0900 |    |    |
| 29   | 9  | 31 | 1     | 113.1500 | 572.8700 |    |    |
| 29   | 9  | 53 | 1     | 125.0900 | 523.5000 |    |    |
| 31   | 9  | 53 | 1     | 124.3600 | 528.4400 |    |    |
| 5    | 10 | 11 | 1     | 119.7200 | 586.9300 |    |    |
| 5    | 10 | 19 | 1     | 119.7200 | 586.9300 |    |    |
| 11   | 10 | 19 | 1     | 119.9700 | 562.1600 |    |    |
| 10   | 11 | 12 | 1     | 120.0100 | 405.5100 |    |    |
| 10   | 11 | 13 | 1     | 119.9700 | 562.1600 |    |    |
| 12   | 11 | 13 | 1     | 120.0100 | 405.5100 |    |    |
| 11   | 13 | 14 | 1     | 120.0100 | 405.5100 |    |    |

|    |    |    |   |          |          |
|----|----|----|---|----------|----------|
| 11 | 13 | 15 | 1 | 119.9700 | 562.1600 |
| 14 | 13 | 15 | 1 | 120.0100 | 405.5100 |
| 13 | 15 | 16 | 1 | 120.0100 | 405.5100 |
| 13 | 15 | 17 | 1 | 119.9700 | 562.1600 |
| 16 | 15 | 17 | 1 | 120.0100 | 405.5100 |
| 15 | 17 | 18 | 1 | 120.0100 | 405.5100 |
| 15 | 17 | 19 | 1 | 119.9700 | 562.1600 |
| 18 | 17 | 19 | 1 | 120.0100 | 405.5100 |
| 6  | 19 | 10 | 1 | 118.3400 | 587.5200 |
| 6  | 19 | 17 | 1 | 118.3400 | 587.5200 |
| 10 | 19 | 17 | 1 | 119.9700 | 562.1600 |
| 5  | 20 | 6  | 1 | 112.0200 | 625.7600 |
| 5  | 20 | 21 | 1 | 123.0200 | 568.3500 |
| 6  | 20 | 21 | 1 | 123.4500 | 560.9100 |
| 7  | 21 | 20 | 1 | 122.6300 | 578.7300 |
| 7  | 21 | 22 | 1 | 122.6300 | 578.7300 |
| 20 | 21 | 22 | 1 | 120.1000 | 552.2000 |
| 21 | 22 | 23 | 1 | 120.0100 | 405.5100 |
| 21 | 22 | 24 | 1 | 119.9700 | 562.1600 |
| 23 | 22 | 24 | 1 | 120.0100 | 405.5100 |
| 22 | 24 | 25 | 1 | 120.0100 | 405.5100 |
| 22 | 24 | 26 | 1 | 119.9700 | 562.1600 |
| 25 | 24 | 26 | 1 | 120.0100 | 405.5100 |
| 24 | 26 | 27 | 1 | 120.0100 | 405.5100 |
| 24 | 26 | 28 | 1 | 119.9700 | 562.1600 |
| 27 | 26 | 28 | 1 | 120.0100 | 405.5100 |
| 7  | 28 | 26 | 1 | 122.6300 | 578.7300 |
| 7  | 28 | 29 | 1 | 118.0200 | 578.9800 |
| 26 | 28 | 29 | 1 | 120.1000 | 552.2000 |
| 8  | 29 | 9  | 1 | 112.0200 | 625.7600 |
| 8  | 29 | 28 | 1 | 123.0200 | 568.3500 |
| 9  | 29 | 28 | 1 | 123.4500 | 560.9100 |
| 8  | 30 | 31 | 1 | 119.7200 | 586.9300 |
| 8  | 30 | 38 | 1 | 119.7200 | 586.9300 |
| 31 | 30 | 38 | 1 | 119.9700 | 562.1600 |
| 9  | 31 | 30 | 1 | 118.3400 | 587.5200 |
| 9  | 31 | 32 | 1 | 118.3400 | 587.5200 |
| 30 | 31 | 32 | 1 | 119.9700 | 562.1600 |
| 31 | 32 | 33 | 1 | 120.0100 | 405.5100 |
| 31 | 32 | 34 | 1 | 119.9700 | 562.1600 |
| 33 | 32 | 34 | 1 | 120.0100 | 405.5100 |
| 32 | 34 | 35 | 1 | 120.0100 | 405.5100 |
| 32 | 34 | 36 | 1 | 119.9700 | 562.1600 |
| 35 | 34 | 36 | 1 | 120.0100 | 405.5100 |
| 34 | 36 | 37 | 1 | 120.0100 | 405.5100 |
| 34 | 36 | 38 | 1 | 119.9700 | 562.1600 |
| 37 | 36 | 38 | 1 | 120.0100 | 405.5100 |
| 30 | 38 | 36 | 1 | 119.9700 | 562.1600 |
| 30 | 38 | 39 | 1 | 120.0100 | 405.5100 |
| 36 | 38 | 39 | 1 | 120.0100 | 405.5100 |
| 6  | 40 | 41 | 1 | 109.4500 | 417.5600 |
| 6  | 40 | 42 | 1 | 109.4500 | 417.5600 |
| 6  | 40 | 43 | 1 | 112.8100 | 550.0300 |
| 41 | 40 | 42 | 1 | 109.5500 | 327.8600 |
| 41 | 40 | 43 | 1 | 110.0700 | 387.9400 |
| 42 | 40 | 43 | 1 | 110.0700 | 387.9400 |
| 40 | 43 | 44 | 1 | 110.0500 | 388.0200 |
| 40 | 43 | 45 | 1 | 110.0500 | 388.0200 |
| 40 | 43 | 46 | 1 | 110.6300 | 528.9400 |
| 44 | 43 | 45 | 1 | 108.3500 | 329.9500 |
| 44 | 43 | 46 | 1 | 110.0500 | 388.0200 |
| 45 | 43 | 46 | 1 | 110.0500 | 388.0200 |
| 43 | 46 | 47 | 1 | 110.0500 | 388.0200 |
| 43 | 46 | 48 | 1 | 110.0500 | 388.0200 |
| 43 | 46 | 49 | 1 | 110.6300 | 528.9400 |
| 47 | 46 | 48 | 1 | 108.3500 | 329.9500 |
| 47 | 46 | 49 | 1 | 110.0500 | 388.0200 |
| 48 | 46 | 49 | 1 | 110.0500 | 388.0200 |
| 46 | 49 | 50 | 1 | 110.0500 | 388.0200 |
| 46 | 49 | 51 | 1 | 110.0500 | 388.0200 |

|    |    |    |   |          |          |
|----|----|----|---|----------|----------|
| 46 | 49 | 52 | 1 | 110.0500 | 388.0200 |
| 50 | 49 | 51 | 1 | 108.3500 | 329.9500 |
| 50 | 49 | 52 | 1 | 108.3500 | 329.9500 |
| 51 | 49 | 52 | 1 | 108.3500 | 329.9500 |
| 9  | 53 | 54 | 1 | 109.4500 | 417.5600 |
| 9  | 53 | 55 | 1 | 109.4500 | 417.5600 |
| 9  | 53 | 56 | 1 | 112.8100 | 550.0300 |
| 54 | 53 | 55 | 1 | 109.5500 | 327.8600 |
| 54 | 53 | 56 | 1 | 110.0700 | 387.9400 |
| 55 | 53 | 56 | 1 | 110.0700 | 387.9400 |
| 53 | 56 | 57 | 1 | 110.0500 | 388.0200 |
| 53 | 56 | 58 | 1 | 110.0500 | 388.0200 |
| 53 | 56 | 59 | 1 | 110.6300 | 528.9400 |
| 57 | 56 | 58 | 1 | 108.3500 | 329.9500 |
| 57 | 56 | 59 | 1 | 110.0500 | 388.0200 |
| 58 | 56 | 59 | 1 | 110.0500 | 388.0200 |
| 56 | 59 | 60 | 1 | 110.0500 | 388.0200 |
| 56 | 59 | 61 | 1 | 110.0500 | 388.0200 |
| 56 | 59 | 62 | 1 | 110.6300 | 528.9400 |
| 60 | 59 | 61 | 1 | 108.3500 | 329.9500 |
| 60 | 59 | 62 | 1 | 110.0500 | 388.0200 |
| 61 | 59 | 62 | 1 | 110.0500 | 388.0200 |
| 59 | 62 | 63 | 1 | 110.0500 | 388.0200 |
| 59 | 62 | 64 | 1 | 110.0500 | 388.0200 |
| 59 | 62 | 65 | 1 | 110.0500 | 388.0200 |
| 63 | 62 | 64 | 1 | 108.3500 | 329.9500 |
| 63 | 62 | 65 | 1 | 108.3500 | 329.9500 |
| 64 | 62 | 65 | 1 | 108.3500 | 329.9500 |
| 1  | 66 | 67 | 1 | 180.0000 | 962.3200 |
| 66 | 67 | 68 | 1 | 179.5200 | 472.9600 |
| 67 | 68 | 69 | 1 | 120.0500 | 551.4500 |
| 67 | 68 | 74 | 1 | 120.0500 | 551.4500 |
| 69 | 68 | 74 | 1 | 119.9700 | 562.1600 |
| 68 | 69 | 70 | 1 | 120.0100 | 405.5100 |
| 68 | 69 | 71 | 1 | 119.9700 | 562.1600 |
| 70 | 69 | 71 | 1 | 120.0100 | 405.5100 |
| 2  | 71 | 69 | 1 | 119.2000 | 584.0000 |
| 2  | 71 | 72 | 1 | 119.2000 | 584.0000 |
| 69 | 71 | 72 | 1 | 119.9700 | 562.1600 |
| 3  | 72 | 71 | 1 | 119.2000 | 584.0000 |
| 3  | 72 | 73 | 1 | 119.2000 | 584.0000 |
| 71 | 72 | 73 | 1 | 119.9700 | 562.1600 |
| 4  | 73 | 72 | 1 | 119.2000 | 584.0000 |
| 4  | 73 | 74 | 1 | 119.2000 | 584.0000 |
| 72 | 73 | 74 | 1 | 119.9700 | 562.1600 |
| 68 | 74 | 73 | 1 | 119.9700 | 562.1600 |
| 68 | 74 | 75 | 1 | 120.0100 | 405.5100 |
| 73 | 74 | 75 | 1 | 120.0100 | 405.5100 |
| 2  | 76 | 77 | 1 | 108.8200 | 425.4300 |
| 2  | 76 | 78 | 1 | 108.8200 | 425.4300 |
| 2  | 76 | 79 | 1 | 108.8200 | 425.4300 |
| 77 | 76 | 78 | 1 | 109.5500 | 327.8600 |
| 77 | 76 | 79 | 1 | 109.5500 | 327.8600 |
| 78 | 76 | 79 | 1 | 109.5500 | 327.8600 |
| 3  | 80 | 81 | 1 | 108.8200 | 425.4300 |
| 3  | 80 | 82 | 1 | 108.8200 | 425.4300 |
| 3  | 80 | 83 | 1 | 108.8200 | 425.4300 |
| 81 | 80 | 82 | 1 | 109.5500 | 327.8600 |
| 81 | 80 | 83 | 1 | 109.5500 | 327.8600 |
| 82 | 80 | 83 | 1 | 109.5500 | 327.8600 |
| 4  | 84 | 85 | 1 | 108.8200 | 425.4300 |
| 4  | 84 | 86 | 1 | 108.8200 | 425.4300 |
| 4  | 84 | 87 | 1 | 108.8200 | 425.4300 |
| 85 | 84 | 86 | 1 | 109.5500 | 327.8600 |
| 85 | 84 | 87 | 1 | 109.5500 | 327.8600 |
| 86 | 84 | 87 | 1 | 109.5500 | 327.8600 |

[ dihedrals ]

| ; | ai | aj | ak | al | funct | c0       | c1      | c2        | c3      | c4      | c5      |
|---|----|----|----|----|-------|----------|---------|-----------|---------|---------|---------|
|   | 7  | 1  | 5  | 10 | 3     | 40.16640 | 0.00000 | -40.16640 | 0.00000 | 0.00000 | 0.00000 |









|    |    |    |    |   |          |         |           |          |         |         |
|----|----|----|----|---|----------|---------|-----------|----------|---------|---------|
| 61 | 59 | 62 | 63 | 3 | 0.62760  | 1.88280 | 0.00000   | -2.51040 | 0.00000 | 0.00000 |
| 61 | 59 | 62 | 64 | 3 | 0.62760  | 1.88280 | 0.00000   | -2.51040 | 0.00000 | 0.00000 |
| 61 | 59 | 62 | 65 | 3 | 0.62760  | 1.88280 | 0.00000   | -2.51040 | 0.00000 | 0.00000 |
| 1  | 66 | 67 | 68 | 3 | 0.00000  | 0.00000 | 0.00000   | 0.00000  | 0.00000 | 0.00000 |
| 66 | 67 | 68 | 69 | 3 | 0.00000  | 0.00000 | 0.00000   | 0.00000  | 0.00000 | 0.00000 |
| 66 | 67 | 68 | 74 | 3 | 0.00000  | 0.00000 | 0.00000   | 0.00000  | 0.00000 | 0.00000 |
| 67 | 68 | 69 | 70 | 3 | 30.33400 | 0.00000 | -30.33400 | 0.00000  | 0.00000 | 0.00000 |
| 67 | 68 | 69 | 71 | 3 | 30.33400 | 0.00000 | -30.33400 | 0.00000  | 0.00000 | 0.00000 |
| 74 | 68 | 69 | 70 | 3 | 30.33400 | 0.00000 | -30.33400 | 0.00000  | 0.00000 | 0.00000 |
| 74 | 68 | 69 | 71 | 3 | 30.33400 | 0.00000 | -30.33400 | 0.00000  | 0.00000 | 0.00000 |
| 67 | 68 | 74 | 73 | 3 | 30.33400 | 0.00000 | -30.33400 | 0.00000  | 0.00000 | 0.00000 |
| 67 | 68 | 74 | 75 | 3 | 30.33400 | 0.00000 | -30.33400 | 0.00000  | 0.00000 | 0.00000 |
| 69 | 68 | 74 | 73 | 3 | 30.33400 | 0.00000 | -30.33400 | 0.00000  | 0.00000 | 0.00000 |
| 69 | 68 | 74 | 75 | 3 | 30.33400 | 0.00000 | -30.33400 | 0.00000  | 0.00000 | 0.00000 |
| 68 | 69 | 71 | 2  | 3 | 30.33400 | 0.00000 | -30.33400 | 0.00000  | 0.00000 | 0.00000 |
| 68 | 69 | 71 | 72 | 3 | 30.33400 | 0.00000 | -30.33400 | 0.00000  | 0.00000 | 0.00000 |
| 70 | 69 | 71 | 2  | 3 | 30.33400 | 0.00000 | -30.33400 | 0.00000  | 0.00000 | 0.00000 |
| 70 | 69 | 71 | 72 | 3 | 30.33400 | 0.00000 | -30.33400 | 0.00000  | 0.00000 | 0.00000 |
| 2  | 71 | 72 | 3  | 3 | 30.33400 | 0.00000 | -30.33400 | 0.00000  | 0.00000 | 0.00000 |
| 2  | 71 | 72 | 73 | 3 | 30.33400 | 0.00000 | -30.33400 | 0.00000  | 0.00000 | 0.00000 |
| 69 | 71 | 72 | 3  | 3 | 30.33400 | 0.00000 | -30.33400 | 0.00000  | 0.00000 | 0.00000 |
| 69 | 71 | 72 | 73 | 3 | 30.33400 | 0.00000 | -30.33400 | 0.00000  | 0.00000 | 0.00000 |
| 3  | 72 | 73 | 4  | 3 | 30.33400 | 0.00000 | -30.33400 | 0.00000  | 0.00000 | 0.00000 |
| 3  | 72 | 73 | 74 | 3 | 30.33400 | 0.00000 | -30.33400 | 0.00000  | 0.00000 | 0.00000 |
| 71 | 72 | 73 | 4  | 3 | 30.33400 | 0.00000 | -30.33400 | 0.00000  | 0.00000 | 0.00000 |
| 71 | 72 | 73 | 74 | 3 | 30.33400 | 0.00000 | -30.33400 | 0.00000  | 0.00000 | 0.00000 |
| 4  | 73 | 74 | 68 | 3 | 30.33400 | 0.00000 | -30.33400 | 0.00000  | 0.00000 | 0.00000 |
| 4  | 73 | 74 | 75 | 3 | 30.33400 | 0.00000 | -30.33400 | 0.00000  | 0.00000 | 0.00000 |
| 72 | 73 | 74 | 68 | 3 | 30.33400 | 0.00000 | -30.33400 | 0.00000  | 0.00000 | 0.00000 |
| 72 | 73 | 74 | 75 | 3 | 30.33400 | 0.00000 | -30.33400 | 0.00000  | 0.00000 | 0.00000 |

[ dihedrals ]

| ; ai | aj | ak | al | funct | c0     | c1      | c2 | c3 |
|------|----|----|----|-------|--------|---------|----|----|
| 2    | 71 | 72 | 69 | 1     | 180.00 | 4.60240 | 2  |    |
| 3    | 72 | 73 | 71 | 1     | 180.00 | 4.60240 | 2  |    |
| 4    | 73 | 74 | 72 | 1     | 180.00 | 4.60240 | 2  |    |
| 5    | 10 | 19 | 11 | 1     | 180.00 | 4.60240 | 2  |    |
| 5    | 20 | 6  | 21 | 1     | 180.00 | 4.60240 | 2  |    |
| 6    | 19 | 17 | 10 | 1     | 180.00 | 4.60240 | 2  |    |
| 7    | 21 | 20 | 22 | 1     | 180.00 | 4.60240 | 2  |    |
| 7    | 28 | 29 | 26 | 1     | 180.00 | 4.60240 | 2  |    |
| 8    | 29 | 9  | 28 | 1     | 180.00 | 4.60240 | 2  |    |
| 8    | 30 | 38 | 31 | 1     | 180.00 | 4.60240 | 2  |    |
| 9    | 31 | 32 | 30 | 1     | 180.00 | 4.60240 | 2  |    |
| 10   | 13 | 11 | 12 | 1     | 180.00 | 4.60240 | 2  |    |
| 11   | 15 | 13 | 14 | 1     | 180.00 | 4.60240 | 2  |    |
| 13   | 17 | 15 | 16 | 1     | 180.00 | 4.60240 | 2  |    |
| 15   | 19 | 17 | 18 | 1     | 180.00 | 4.60240 | 2  |    |
| 20   | 6  | 19 | 40 | 1     | 180.00 | 4.60240 | 2  |    |
| 21   | 24 | 22 | 23 | 1     | 180.00 | 4.60240 | 2  |    |
| 22   | 26 | 24 | 25 | 1     | 180.00 | 4.60240 | 2  |    |
| 24   | 28 | 26 | 27 | 1     | 180.00 | 4.60240 | 2  |    |
| 29   | 9  | 31 | 53 | 1     | 180.00 | 4.60240 | 2  |    |
| 30   | 36 | 38 | 39 | 1     | 180.00 | 4.60240 | 2  |    |
| 31   | 34 | 32 | 33 | 1     | 180.00 | 4.60240 | 2  |    |
| 32   | 36 | 34 | 35 | 1     | 180.00 | 4.60240 | 2  |    |
| 34   | 38 | 36 | 37 | 1     | 180.00 | 4.60240 | 2  |    |
| 67   | 68 | 74 | 69 | 1     | 180.00 | 4.60240 | 2  |    |
| 68   | 71 | 69 | 70 | 1     | 180.00 | 4.60240 | 2  |    |
| 68   | 73 | 74 | 75 | 1     | 180.00 | 4.60240 | 2  |    |

[ system ]

; Name  
PtB-a

[ molecules ]

; Compound #mols  
PtB-a 1

**Table S11.** Force field parameters of PtB-b system in GROMACS format used in this work.

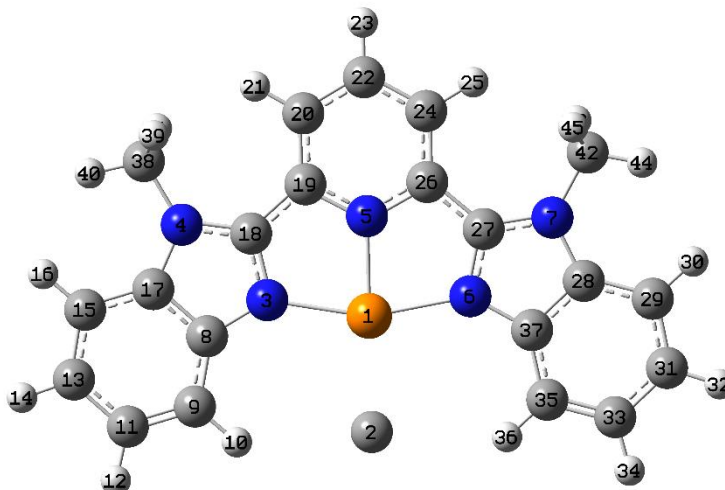

**;PtB-b force field parameters**

**;PtB-b\_GMX.top**

```
[ defaults ]
; nbfunc      comb-rule   gen-pairs   fudgeLJ    fudgeQQ
1             2           yes         0.5        0.8333

[ atomtypes ]
; name      at.num  mass    charge  ptype  sigma    epsilon
PTI_Pt      78      195.078  0.0000  A      3.3298e-01  1.0534e+01
PTI_cl      17      35.450  0.0000  A      3.47094e-01  1.10876e+00
PTI_nc      7       14.01   0.0000  A      3.25000e-01  7.11280e-01
PTI_na      7       14.01   0.0000  A      3.25000e-01  7.11280e-01
PTI_nb      7       14.01   0.0000  A      3.25000e-01  7.11280e-01
PTI_ca      6       12.01   0.0000  A      3.39967e-01  3.59824e-01
PTI_ha      1       1.008   0.0000  A      2.59964e-01  6.27600e-02
PTI_cd      6       12.01   0.0000  A      3.39967e-01  3.59824e-01
PTI_c3      6       12.01   0.0000  A      3.39967e-01  4.57730e-01
PTI_h1      1       1.008   0.0000  A      2.47135e-01  6.56888e-02

[ moleculetype ]
; Name      nrexcl
PtB-b      3

[ atoms ]
; nr  type  resnr  residue  atom  cgnr  charge  mass  typeB  chargeB  massB
; residue  1  PTI  rtp  PTI  q +1.0
1  PTI_Pt  1  PTI  PT1  1  -0.201109  195.078  ; qtot -0.2011
2  PTI_cl  1  PTI  CL1  2  -0.240282  35.45  ; qtot -0.4414
3  PTI_nc  1  PTI  N1  3  0.044289  14.01  ; qtot -0.3971
4  PTI_na  1  PTI  N2  4  -0.408906  14.01  ; qtot -0.806
5  PTI_nb  1  PTI  N3  5  -0.04731  14.01  ; qtot -0.8533
6  PTI_nc  1  PTI  N4  6  0.044289  14.01  ; qtot -0.809
7  PTI_na  1  PTI  N5  7  -0.408906  14.01  ; qtot -1.218
8  PTI_ca  1  PTI  C1  8  0.148116  12.01  ; qtot -1.07
9  PTI_ca  1  PTI  C2  9  -0.217522  12.01  ; qtot -1.287
10 PTI_ha  1  PTI  H1  10  0.1958  1.008  ; qtot -1.092
11 PTI_ca  1  PTI  C3  11  -0.106842  12.01  ; qtot -1.198
12 PTI_ha  1  PTI  H2  12  0.153899  1.008  ; qtot -1.044
13 PTI_ca  1  PTI  C4  13  -0.076146  12.01  ; qtot -1.121
14 PTI_ha  1  PTI  H3  14  0.151311  1.008  ; qtot -0.9693
15 PTI_ca  1  PTI  C5  15  -0.280998  12.01  ; qtot -1.25
16 PTI_ha  1  PTI  H4  16  0.184387  1.008  ; qtot -1.066
17 PTI_ca  1  PTI  C6  17  0.250779  12.01  ; qtot -0.8152
18 PTI_cd  1  PTI  C7  18  0.081892  12.01  ; qtot -0.7333
19 PTI_ca  1  PTI  C8  19  0.250755  12.01  ; qtot -0.4825
20 PTI_ca  1  PTI  C9  20  -0.277609  12.01  ; qtot -0.7601
21 PTI_ha  1  PTI  H5  21  0.183021  1.008  ; qtot -0.5771
```

|    |        |   |     |     |    |           |       |                 |
|----|--------|---|-----|-----|----|-----------|-------|-----------------|
| 22 | PTI_ca | 1 | PTI | C10 | 22 | 0.006689  | 12.01 | ; qtot -0.5704  |
| 23 | PTI_ha | 1 | PTI | H6  | 23 | 0.157288  | 1.008 | ; qtot -0.4131  |
| 24 | PTI_ca | 1 | PTI | C11 | 24 | -0.277609 | 12.01 | ; qtot -0.6907  |
| 25 | PTI_ha | 1 | PTI | H7  | 25 | 0.183021  | 1.008 | ; qtot -0.5077  |
| 26 | PTI_ca | 1 | PTI | C12 | 26 | 0.250755  | 12.01 | ; qtot -0.2569  |
| 27 | PTI_cd | 1 | PTI | C13 | 27 | 0.081892  | 12.01 | ; qtot -0.1751  |
| 28 | PTI_ca | 1 | PTI | C14 | 28 | 0.250779  | 12.01 | ; qtot 0.07572  |
| 29 | PTI_ca | 1 | PTI | C15 | 29 | -0.280998 | 12.01 | ; qtot -0.2053  |
| 30 | PTI_ha | 1 | PTI | H8  | 30 | 0.184387  | 1.008 | ; qtot -0.02089 |
| 31 | PTI_ca | 1 | PTI | C16 | 31 | -0.076146 | 12.01 | ; qtot -0.09703 |
| 32 | PTI_ha | 1 | PTI | H9  | 32 | 0.151311  | 1.008 | ; qtot 0.05428  |
| 33 | PTI_ca | 1 | PTI | C17 | 33 | -0.106842 | 12.01 | ; qtot -0.05256 |
| 34 | PTI_ha | 1 | PTI | H10 | 34 | 0.153899  | 1.008 | ; qtot 0.1013   |
| 35 | PTI_ca | 1 | PTI | C18 | 35 | -0.217522 | 12.01 | ; qtot -0.1162  |
| 36 | PTI_ha | 1 | PTI | H11 | 36 | 0.1958    | 1.008 | ; qtot 0.07961  |
| 37 | PTI_ca | 1 | PTI | C19 | 37 | 0.148116  | 12.01 | ; qtot 0.2277   |
| 38 | PTI_c3 | 1 | PTI | C20 | 38 | 0.507137  | 12.01 | ; qtot 0.7349   |
| 39 | PTI_h1 | 1 | PTI | H12 | 39 | -0.040334 | 1.008 | ; qtot 0.6945   |
| 40 | PTI_h1 | 1 | PTI | H13 | 40 | -0.040334 | 1.008 | ; qtot 0.6542   |
| 41 | PTI_h1 | 1 | PTI | H14 | 41 | -0.040334 | 1.008 | ; qtot 0.6139   |
| 42 | PTI_c3 | 1 | PTI | C21 | 42 | 0.507137  | 12.01 | ; qtot 1.121    |
| 43 | PTI_h1 | 1 | PTI | H15 | 43 | -0.040334 | 1.008 | ; qtot 1.081    |
| 44 | PTI_h1 | 1 | PTI | H16 | 44 | -0.040334 | 1.008 | ; qtot 1.04     |
| 45 | PTI_h1 | 1 | PTI | H17 | 45 | -0.040334 | 1.008 | ; qtot 1        |

[ bonds ]

| ; ai | aj | funct | c0      | c1       | c2 | c3 |
|------|----|-------|---------|----------|----|----|
| 1    | 2  | 1     | 0.22925 | 131440.0 |    |    |
| 1    | 3  | 1     | 0.20087 | 306270.0 |    |    |
| 1    | 5  | 1     | 0.19043 | 306270.0 |    |    |
| 1    | 6  | 1     | 0.20087 | 306270.0 |    |    |
| 3    | 8  | 1     | 0.13360 | 412460.0 |    |    |
| 3    | 18 | 1     | 0.13350 | 413880.0 |    |    |
| 4    | 17 | 1     | 0.13500 | 393550.0 |    |    |
| 4    | 18 | 1     | 0.13710 | 367190.0 |    |    |
| 4    | 38 | 1     | 0.14560 | 280080.0 |    |    |
| 5    | 19 | 1     | 0.13420 | 404260.0 |    |    |
| 5    | 26 | 1     | 0.13420 | 404260.0 |    |    |
| 6    | 27 | 1     | 0.13350 | 413880.0 |    |    |
| 6    | 37 | 1     | 0.13360 | 412460.0 |    |    |
| 7    | 27 | 1     | 0.13710 | 367190.0 |    |    |
| 7    | 28 | 1     | 0.13500 | 393550.0 |    |    |
| 7    | 42 | 1     | 0.14560 | 280080.0 |    |    |
| 8    | 9  | 1     | 0.13870 | 400330.0 |    |    |
| 8    | 17 | 1     | 0.13870 | 400330.0 |    |    |
| 9    | 10 | 1     | 0.10870 | 288110.0 |    |    |
| 9    | 11 | 1     | 0.13870 | 400330.0 |    |    |
| 11   | 12 | 1     | 0.10870 | 288110.0 |    |    |
| 11   | 13 | 1     | 0.13870 | 400330.0 |    |    |
| 13   | 14 | 1     | 0.10870 | 288110.0 |    |    |
| 13   | 15 | 1     | 0.13870 | 400330.0 |    |    |
| 15   | 16 | 1     | 0.10870 | 288110.0 |    |    |
| 15   | 17 | 1     | 0.13870 | 400330.0 |    |    |
| 18   | 19 | 1     | 0.14340 | 344510.0 |    |    |
| 19   | 20 | 1     | 0.13870 | 400330.0 |    |    |
| 20   | 21 | 1     | 0.10870 | 288110.0 |    |    |
| 20   | 22 | 1     | 0.13870 | 400330.0 |    |    |
| 22   | 23 | 1     | 0.10870 | 288110.0 |    |    |
| 22   | 24 | 1     | 0.13870 | 400330.0 |    |    |
| 24   | 25 | 1     | 0.10870 | 288110.0 |    |    |
| 24   | 26 | 1     | 0.13870 | 400330.0 |    |    |
| 26   | 27 | 1     | 0.14340 | 344510.0 |    |    |
| 28   | 29 | 1     | 0.13870 | 400330.0 |    |    |
| 28   | 37 | 1     | 0.13870 | 400330.0 |    |    |
| 29   | 30 | 1     | 0.10870 | 288110.0 |    |    |
| 29   | 31 | 1     | 0.13870 | 400330.0 |    |    |
| 31   | 32 | 1     | 0.10870 | 288110.0 |    |    |
| 31   | 33 | 1     | 0.13870 | 400330.0 |    |    |
| 33   | 34 | 1     | 0.10870 | 288110.0 |    |    |
| 33   | 35 | 1     | 0.13870 | 400330.0 |    |    |

|    |    |   |         |          |
|----|----|---|---------|----------|
| 35 | 36 | 1 | 0.10870 | 288110.0 |
| 35 | 37 | 1 | 0.13870 | 400330.0 |
| 38 | 39 | 1 | 0.10930 | 281080.0 |
| 38 | 40 | 1 | 0.10930 | 281080.0 |
| 38 | 41 | 1 | 0.10930 | 281080.0 |
| 42 | 43 | 1 | 0.10930 | 281080.0 |
| 42 | 44 | 1 | 0.10930 | 281080.0 |
| 42 | 45 | 1 | 0.10930 | 281080.0 |

[ pairs ]

| ; ai | aj | funct | c0 | c1 | c2 | c3 |
|------|----|-------|----|----|----|----|
| 1    | 4  | 1     |    |    |    |    |
| 1    | 7  | 1     |    |    |    |    |
| 1    | 9  | 1     |    |    |    |    |
| 1    | 17 | 1     |    |    |    |    |
| 1    | 20 | 1     |    |    |    |    |
| 1    | 24 | 1     |    |    |    |    |
| 1    | 28 | 1     |    |    |    |    |
| 1    | 35 | 1     |    |    |    |    |
| 2    | 8  | 1     |    |    |    |    |
| 2    | 18 | 1     |    |    |    |    |
| 2    | 19 | 1     |    |    |    |    |
| 2    | 26 | 1     |    |    |    |    |
| 2    | 27 | 1     |    |    |    |    |
| 2    | 37 | 1     |    |    |    |    |
| 3    | 10 | 1     |    |    |    |    |
| 3    | 11 | 1     |    |    |    |    |
| 3    | 15 | 1     |    |    |    |    |
| 3    | 20 | 1     |    |    |    |    |
| 3    | 26 | 1     |    |    |    |    |
| 3    | 27 | 1     |    |    |    |    |
| 3    | 37 | 1     |    |    |    |    |
| 3    | 38 | 1     |    |    |    |    |
| 4    | 5  | 1     |    |    |    |    |
| 4    | 9  | 1     |    |    |    |    |
| 4    | 13 | 1     |    |    |    |    |
| 4    | 16 | 1     |    |    |    |    |
| 4    | 20 | 1     |    |    |    |    |
| 5    | 7  | 1     |    |    |    |    |
| 5    | 8  | 1     |    |    |    |    |
| 5    | 21 | 1     |    |    |    |    |
| 5    | 22 | 1     |    |    |    |    |
| 5    | 25 | 1     |    |    |    |    |
| 5    | 37 | 1     |    |    |    |    |
| 6    | 8  | 1     |    |    |    |    |
| 6    | 18 | 1     |    |    |    |    |
| 6    | 19 | 1     |    |    |    |    |
| 6    | 24 | 1     |    |    |    |    |
| 6    | 29 | 1     |    |    |    |    |
| 6    | 33 | 1     |    |    |    |    |
| 6    | 36 | 1     |    |    |    |    |
| 6    | 42 | 1     |    |    |    |    |
| 7    | 24 | 1     |    |    |    |    |
| 7    | 30 | 1     |    |    |    |    |
| 7    | 31 | 1     |    |    |    |    |
| 7    | 35 | 1     |    |    |    |    |
| 8    | 12 | 1     |    |    |    |    |
| 8    | 13 | 1     |    |    |    |    |
| 8    | 16 | 1     |    |    |    |    |
| 8    | 19 | 1     |    |    |    |    |
| 8    | 38 | 1     |    |    |    |    |
| 9    | 14 | 1     |    |    |    |    |
| 9    | 15 | 1     |    |    |    |    |
| 9    | 18 | 1     |    |    |    |    |
| 10   | 12 | 1     |    |    |    |    |
| 10   | 13 | 1     |    |    |    |    |
| 10   | 17 | 1     |    |    |    |    |
| 11   | 16 | 1     |    |    |    |    |
| 11   | 17 | 1     |    |    |    |    |
| 12   | 14 | 1     |    |    |    |    |

```

12 15 1
14 16 1
14 17 1
15 18 1
15 38 1
17 19 1
17 39 1
17 40 1
17 41 1
18 21 1
18 22 1
18 26 1
18 39 1
18 40 1
18 41 1
19 23 1
19 24 1
19 27 1
19 38 1
20 25 1
20 26 1
21 23 1
21 24 1
22 27 1
23 25 1
23 26 1
25 27 1
26 28 1
26 37 1
26 42 1
27 29 1
27 35 1
27 43 1
27 44 1
27 45 1
28 32 1
28 33 1
28 36 1
28 43 1
28 44 1
28 45 1
29 34 1
29 35 1
29 42 1
30 32 1
30 33 1
30 37 1
31 36 1
31 37 1
32 34 1
32 35 1
34 36 1
34 37 1
37 42 1

```

```

[ angles ]
; ai aj ak funct c0 c1 c2 c3
 2  1  3  1  99.2792  962.3200
 2  1  5  1  180.000  962.3200
 2  1  6  1  99.2792  962.3200
 3  1  5  1  80.7208  351.4600
 3  1  6  1  161.4417  351.4600
 5  1  6  1  80.7208  351.4600
 1  3  8  1  141.3038  167.3600
 1  3 18  1  112.8504  167.3600
 8  3 18  1  104.2400  608.1000
17  4 18  1  113.1500  572.8700
17  4 38  1  124.3600  528.4400
18  4 38  1  125.0900  523.5000
 1  5 19  1  121.2232  167.3600

```

|    |    |    |   |          |          |
|----|----|----|---|----------|----------|
| 1  | 5  | 26 | 1 | 121.2232 | 167.3600 |
| 19 | 5  | 26 | 1 | 115.8600 | 573.9600 |
| 1  | 6  | 27 | 1 | 112.8504 | 167.3600 |
| 1  | 6  | 37 | 1 | 141.3038 | 167.3600 |
| 27 | 6  | 37 | 1 | 104.2400 | 608.1000 |
| 27 | 7  | 28 | 1 | 113.1500 | 572.8700 |
| 27 | 7  | 42 | 1 | 125.0900 | 523.5000 |
| 28 | 7  | 42 | 1 | 124.3600 | 528.4400 |
| 3  | 8  | 9  | 1 | 119.7200 | 586.9300 |
| 3  | 8  | 17 | 1 | 119.7200 | 586.9300 |
| 9  | 8  | 17 | 1 | 119.9700 | 562.1600 |
| 8  | 9  | 10 | 1 | 120.0100 | 405.5100 |
| 8  | 9  | 11 | 1 | 119.9700 | 562.1600 |
| 10 | 9  | 11 | 1 | 120.0100 | 405.5100 |
| 9  | 11 | 12 | 1 | 120.0100 | 405.5100 |
| 9  | 11 | 13 | 1 | 119.9700 | 562.1600 |
| 12 | 11 | 13 | 1 | 120.0100 | 405.5100 |
| 11 | 13 | 14 | 1 | 120.0100 | 405.5100 |
| 11 | 13 | 15 | 1 | 119.9700 | 562.1600 |
| 14 | 13 | 15 | 1 | 120.0100 | 405.5100 |
| 13 | 15 | 16 | 1 | 120.0100 | 405.5100 |
| 13 | 15 | 17 | 1 | 119.9700 | 562.1600 |
| 16 | 15 | 17 | 1 | 120.0100 | 405.5100 |
| 4  | 17 | 8  | 1 | 118.3400 | 587.5200 |
| 4  | 17 | 15 | 1 | 118.3400 | 587.5200 |
| 8  | 17 | 15 | 1 | 119.9700 | 562.1600 |
| 3  | 18 | 4  | 1 | 112.0200 | 625.7600 |
| 3  | 18 | 19 | 1 | 115.0500 | 587.6800 |
| 4  | 18 | 19 | 1 | 123.4500 | 560.9100 |
| 5  | 19 | 18 | 1 | 117.5000 | 580.2400 |
| 5  | 19 | 20 | 1 | 122.6300 | 578.7300 |
| 18 | 19 | 20 | 1 | 120.1000 | 552.2000 |
| 19 | 20 | 21 | 1 | 120.0100 | 405.5100 |
| 19 | 20 | 22 | 1 | 119.9700 | 562.1600 |
| 21 | 20 | 22 | 1 | 120.0100 | 405.5100 |
| 20 | 22 | 23 | 1 | 120.0100 | 405.5100 |
| 20 | 22 | 24 | 1 | 119.9700 | 562.1600 |
| 23 | 22 | 24 | 1 | 120.0100 | 405.5100 |
| 22 | 24 | 25 | 1 | 120.0100 | 405.5100 |
| 22 | 24 | 26 | 1 | 119.9700 | 562.1600 |
| 25 | 24 | 26 | 1 | 120.0100 | 405.5100 |
| 5  | 26 | 24 | 1 | 122.6300 | 578.7300 |
| 5  | 26 | 27 | 1 | 117.5000 | 580.2400 |
| 24 | 26 | 27 | 1 | 120.1000 | 552.2000 |
| 6  | 27 | 7  | 1 | 112.0200 | 625.7600 |
| 6  | 27 | 26 | 1 | 115.0500 | 587.6800 |
| 7  | 27 | 26 | 1 | 123.4500 | 560.9100 |
| 7  | 28 | 29 | 1 | 118.3400 | 587.5200 |
| 7  | 28 | 37 | 1 | 118.3400 | 587.5200 |
| 29 | 28 | 37 | 1 | 119.9700 | 562.1600 |
| 28 | 29 | 30 | 1 | 120.0100 | 405.5100 |
| 28 | 29 | 31 | 1 | 119.9700 | 562.1600 |
| 30 | 29 | 31 | 1 | 120.0100 | 405.5100 |
| 29 | 31 | 32 | 1 | 120.0100 | 405.5100 |
| 29 | 31 | 33 | 1 | 119.9700 | 562.1600 |
| 32 | 31 | 33 | 1 | 120.0100 | 405.5100 |
| 31 | 33 | 34 | 1 | 120.0100 | 405.5100 |
| 31 | 33 | 35 | 1 | 119.9700 | 562.1600 |
| 34 | 33 | 35 | 1 | 120.0100 | 405.5100 |
| 33 | 35 | 36 | 1 | 120.0100 | 405.5100 |
| 33 | 35 | 37 | 1 | 119.9700 | 562.1600 |
| 36 | 35 | 37 | 1 | 120.0100 | 405.5100 |
| 6  | 37 | 28 | 1 | 119.7200 | 586.9300 |
| 6  | 37 | 35 | 1 | 119.7200 | 586.9300 |
| 28 | 37 | 35 | 1 | 119.9700 | 562.1600 |
| 4  | 38 | 39 | 1 | 109.4500 | 417.5600 |
| 4  | 38 | 40 | 1 | 109.4500 | 417.5600 |
| 4  | 38 | 41 | 1 | 109.4500 | 417.5600 |
| 39 | 38 | 40 | 1 | 109.5500 | 327.8600 |
| 39 | 38 | 41 | 1 | 109.5500 | 327.8600 |



|    |    |    |   |          |          |
|----|----|----|---|----------|----------|
| 40 | 38 | 41 | 1 | 109.5500 | 327.8600 |
| 7  | 42 | 43 | 1 | 109.4500 | 417.5600 |
| 7  | 42 | 44 | 1 | 109.4500 | 417.5600 |
| 7  | 42 | 45 | 1 | 109.4500 | 417.5600 |
| 43 | 42 | 44 | 1 | 109.5500 | 327.8600 |
| 43 | 42 | 45 | 1 | 109.5500 | 327.8600 |
| 44 | 42 | 45 | 1 | 109.5500 | 327.8600 |

[ dihedrals ]

| ; ai | aj | ak | al | funct | c0       | c1      | c2        | c3      | c4      | c5      |
|------|----|----|----|-------|----------|---------|-----------|---------|---------|---------|
| 2    | 1  | 3  | 8  | 3     | 0.69700  | 0.00000 | -0.79600  | 0.00000 | 0.00000 | 0.00000 |
| 2    | 1  | 3  | 18 | 3     | 0.69700  | 0.00000 | -0.79600  | 0.00000 | 0.00000 | 0.00000 |
| 5    | 1  | 3  | 8  | 3     | 0.69700  | 0.00000 | -0.79600  | 0.00000 | 0.00000 | 0.00000 |
| 5    | 1  | 3  | 18 | 3     | 0.69700  | 0.00000 | -0.79600  | 0.00000 | 0.00000 | 0.00000 |
| 6    | 1  | 3  | 8  | 3     | 0.69700  | 0.00000 | -0.79600  | 0.00000 | 0.00000 | 0.00000 |
| 6    | 1  | 3  | 18 | 3     | 0.69700  | 0.00000 | -0.79600  | 0.00000 | 0.00000 | 0.00000 |
| 2    | 1  | 5  | 19 | 3     | 0.69700  | 0.00000 | -0.79600  | 0.00000 | 0.00000 | 0.00000 |
| 2    | 1  | 5  | 26 | 3     | 0.69700  | 0.00000 | -0.79600  | 0.00000 | 0.00000 | 0.00000 |
| 3    | 1  | 5  | 19 | 3     | 0.69700  | 0.00000 | -0.79600  | 0.00000 | 0.00000 | 0.00000 |
| 3    | 1  | 5  | 26 | 3     | 0.69700  | 0.00000 | -0.79600  | 0.00000 | 0.00000 | 0.00000 |
| 6    | 1  | 5  | 19 | 3     | 0.69700  | 0.00000 | -0.79600  | 0.00000 | 0.00000 | 0.00000 |
| 6    | 1  | 5  | 26 | 3     | 0.69700  | 0.00000 | -0.79600  | 0.00000 | 0.00000 | 0.00000 |
| 2    | 1  | 6  | 27 | 3     | 0.69700  | 0.00000 | -0.79600  | 0.00000 | 0.00000 | 0.00000 |
| 2    | 1  | 6  | 37 | 3     | 0.69700  | 0.00000 | -0.79600  | 0.00000 | 0.00000 | 0.00000 |
| 3    | 1  | 6  | 27 | 3     | 0.69700  | 0.00000 | -0.79600  | 0.00000 | 0.00000 | 0.00000 |
| 3    | 1  | 6  | 37 | 3     | 0.69700  | 0.00000 | -0.79600  | 0.00000 | 0.00000 | 0.00000 |
| 5    | 1  | 6  | 27 | 3     | 0.69700  | 0.00000 | -0.79600  | 0.00000 | 0.00000 | 0.00000 |
| 5    | 1  | 6  | 37 | 3     | 0.69700  | 0.00000 | -0.79600  | 0.00000 | 0.00000 | 0.00000 |
| 1    | 3  | 8  | 9  | 3     | 39.74800 | 0.00000 | -39.74800 | 0.00000 | 0.00000 | 0.00000 |
| 1    | 3  | 8  | 17 | 3     | 39.74800 | 0.00000 | -39.74800 | 0.00000 | 0.00000 | 0.00000 |
| 18   | 3  | 8  | 9  | 3     | 40.16640 | 0.00000 | -40.16640 | 0.00000 | 0.00000 | 0.00000 |
| 18   | 3  | 8  | 17 | 3     | 40.16640 | 0.00000 | -40.16640 | 0.00000 | 0.00000 | 0.00000 |
| 1    | 3  | 18 | 4  | 3     | 39.74800 | 0.00000 | -39.74800 | 0.00000 | 0.00000 | 0.00000 |
| 1    | 3  | 18 | 19 | 3     | 39.74800 | 0.00000 | -39.74800 | 0.00000 | 0.00000 | 0.00000 |
| 8    | 3  | 18 | 4  | 3     | 39.74800 | 0.00000 | -39.74800 | 0.00000 | 0.00000 | 0.00000 |
| 8    | 3  | 18 | 19 | 3     | 39.74800 | 0.00000 | -39.74800 | 0.00000 | 0.00000 | 0.00000 |
| 18   | 4  | 17 | 8  | 3     | 2.51040  | 0.00000 | -2.51040  | 0.00000 | 0.00000 | 0.00000 |
| 18   | 4  | 17 | 15 | 3     | 2.51040  | 0.00000 | -2.51040  | 0.00000 | 0.00000 | 0.00000 |
| 38   | 4  | 17 | 8  | 3     | 2.51040  | 0.00000 | -2.51040  | 0.00000 | 0.00000 | 0.00000 |
| 38   | 4  | 17 | 15 | 3     | 2.51040  | 0.00000 | -2.51040  | 0.00000 | 0.00000 | 0.00000 |
| 17   | 4  | 18 | 3  | 3     | 14.22560 | 0.00000 | -14.22560 | 0.00000 | 0.00000 | 0.00000 |
| 17   | 4  | 18 | 19 | 3     | 14.22560 | 0.00000 | -14.22560 | 0.00000 | 0.00000 | 0.00000 |
| 38   | 4  | 18 | 3  | 3     | 14.22560 | 0.00000 | -14.22560 | 0.00000 | 0.00000 | 0.00000 |
| 38   | 4  | 18 | 19 | 3     | 14.22560 | 0.00000 | -14.22560 | 0.00000 | 0.00000 | 0.00000 |
| 17   | 4  | 38 | 39 | 3     | 0.00000  | 0.00000 | 0.00000   | 0.00000 | 0.00000 | 0.00000 |
| 17   | 4  | 38 | 40 | 3     | 0.00000  | 0.00000 | 0.00000   | 0.00000 | 0.00000 | 0.00000 |
| 17   | 4  | 38 | 41 | 3     | 0.00000  | 0.00000 | 0.00000   | 0.00000 | 0.00000 | 0.00000 |
| 18   | 4  | 38 | 39 | 3     | 0.00000  | 0.00000 | 0.00000   | 0.00000 | 0.00000 | 0.00000 |
| 18   | 4  | 38 | 40 | 3     | 0.00000  | 0.00000 | 0.00000   | 0.00000 | 0.00000 | 0.00000 |
| 18   | 4  | 38 | 41 | 3     | 0.00000  | 0.00000 | 0.00000   | 0.00000 | 0.00000 | 0.00000 |
| 1    | 5  | 19 | 18 | 3     | 39.74800 | 0.00000 | -39.74800 | 0.00000 | 0.00000 | 0.00000 |
| 1    | 5  | 19 | 20 | 3     | 39.74800 | 0.00000 | -39.74800 | 0.00000 | 0.00000 | 0.00000 |
| 26   | 5  | 19 | 18 | 3     | 40.16640 | 0.00000 | -40.16640 | 0.00000 | 0.00000 | 0.00000 |
| 26   | 5  | 19 | 20 | 3     | 40.16640 | 0.00000 | -40.16640 | 0.00000 | 0.00000 | 0.00000 |
| 1    | 5  | 26 | 24 | 3     | 39.74800 | 0.00000 | -39.74800 | 0.00000 | 0.00000 | 0.00000 |
| 1    | 5  | 26 | 27 | 3     | 39.74800 | 0.00000 | -39.74800 | 0.00000 | 0.00000 | 0.00000 |
| 19   | 5  | 26 | 24 | 3     | 40.16640 | 0.00000 | -40.16640 | 0.00000 | 0.00000 | 0.00000 |
| 19   | 5  | 26 | 27 | 3     | 40.16640 | 0.00000 | -40.16640 | 0.00000 | 0.00000 | 0.00000 |
| 1    | 6  | 27 | 7  | 3     | 39.74800 | 0.00000 | -39.74800 | 0.00000 | 0.00000 | 0.00000 |
| 1    | 6  | 27 | 26 | 3     | 39.74800 | 0.00000 | -39.74800 | 0.00000 | 0.00000 | 0.00000 |
| 37   | 6  | 27 | 7  | 3     | 39.74800 | 0.00000 | -39.74800 | 0.00000 | 0.00000 | 0.00000 |
| 37   | 6  | 27 | 26 | 3     | 39.74800 | 0.00000 | -39.74800 | 0.00000 | 0.00000 | 0.00000 |
| 1    | 6  | 37 | 28 | 3     | 39.74800 | 0.00000 | -39.74800 | 0.00000 | 0.00000 | 0.00000 |
| 1    | 6  | 37 | 35 | 3     | 39.74800 | 0.00000 | -39.74800 | 0.00000 | 0.00000 | 0.00000 |
| 27   | 6  | 37 | 28 | 3     | 40.16640 | 0.00000 | -40.16640 | 0.00000 | 0.00000 | 0.00000 |
| 27   | 6  | 37 | 35 | 3     | 40.16640 | 0.00000 | -40.16640 | 0.00000 | 0.00000 | 0.00000 |
| 28   | 7  | 27 | 6  | 3     | 14.22560 | 0.00000 | -14.22560 | 0.00000 | 0.00000 | 0.00000 |
| 28   | 7  | 27 | 26 | 3     | 14.22560 | 0.00000 | -14.22560 | 0.00000 | 0.00000 | 0.00000 |
| 42   | 7  | 27 | 6  | 3     | 14.22560 | 0.00000 | -14.22560 | 0.00000 | 0.00000 | 0.00000 |
| 42   | 7  | 27 | 26 | 3     | 14.22560 | 0.00000 | -14.22560 | 0.00000 | 0.00000 | 0.00000 |



|    |    |    |    |   |          |         |           |         |         |         |
|----|----|----|----|---|----------|---------|-----------|---------|---------|---------|
| 29 | 31 | 33 | 34 | 3 | 30.33400 | 0.00000 | -30.33400 | 0.00000 | 0.00000 | 0.00000 |
| 29 | 31 | 33 | 35 | 3 | 30.33400 | 0.00000 | -30.33400 | 0.00000 | 0.00000 | 0.00000 |
| 32 | 31 | 33 | 34 | 3 | 30.33400 | 0.00000 | -30.33400 | 0.00000 | 0.00000 | 0.00000 |
| 32 | 31 | 33 | 35 | 3 | 30.33400 | 0.00000 | -30.33400 | 0.00000 | 0.00000 | 0.00000 |
| 31 | 33 | 35 | 36 | 3 | 30.33400 | 0.00000 | -30.33400 | 0.00000 | 0.00000 | 0.00000 |
| 31 | 33 | 35 | 37 | 3 | 30.33400 | 0.00000 | -30.33400 | 0.00000 | 0.00000 | 0.00000 |
| 34 | 33 | 35 | 36 | 3 | 30.33400 | 0.00000 | -30.33400 | 0.00000 | 0.00000 | 0.00000 |
| 34 | 33 | 35 | 37 | 3 | 30.33400 | 0.00000 | -30.33400 | 0.00000 | 0.00000 | 0.00000 |
| 33 | 35 | 37 | 6  | 3 | 30.33400 | 0.00000 | -30.33400 | 0.00000 | 0.00000 | 0.00000 |
| 33 | 35 | 37 | 28 | 3 | 30.33400 | 0.00000 | -30.33400 | 0.00000 | 0.00000 | 0.00000 |
| 36 | 35 | 37 | 6  | 3 | 30.33400 | 0.00000 | -30.33400 | 0.00000 | 0.00000 | 0.00000 |
| 36 | 35 | 37 | 28 | 3 | 30.33400 | 0.00000 | -30.33400 | 0.00000 | 0.00000 | 0.00000 |

[ dihedrals ]

| ; ai | aj | ak | al | funct | c0     | c1      | c2 | c3 |
|------|----|----|----|-------|--------|---------|----|----|
| 3    | 8  | 17 | 9  | 1     | 180.00 | 4.60240 | 2  |    |
| 3    | 18 | 4  | 19 | 1     | 180.00 | 4.60240 | 2  |    |
| 4    | 17 | 15 | 8  | 1     | 180.00 | 4.60240 | 2  |    |
| 5    | 19 | 18 | 20 | 1     | 180.00 | 4.60240 | 2  |    |
| 5    | 26 | 27 | 24 | 1     | 180.00 | 4.60240 | 2  |    |
| 6    | 27 | 7  | 26 | 1     | 180.00 | 4.60240 | 2  |    |
| 6    | 37 | 35 | 28 | 1     | 180.00 | 4.60240 | 2  |    |
| 7    | 28 | 37 | 29 | 1     | 180.00 | 4.60240 | 2  |    |
| 8    | 11 | 9  | 10 | 1     | 180.00 | 4.60240 | 2  |    |
| 9    | 13 | 11 | 12 | 1     | 180.00 | 4.60240 | 2  |    |
| 11   | 15 | 13 | 14 | 1     | 180.00 | 4.60240 | 2  |    |
| 13   | 17 | 15 | 16 | 1     | 180.00 | 4.60240 | 2  |    |
| 18   | 4  | 17 | 38 | 1     | 180.00 | 4.60240 | 2  |    |
| 19   | 22 | 20 | 21 | 1     | 180.00 | 4.60240 | 2  |    |
| 20   | 24 | 22 | 23 | 1     | 180.00 | 4.60240 | 2  |    |
| 22   | 26 | 24 | 25 | 1     | 180.00 | 4.60240 | 2  |    |
| 27   | 7  | 28 | 42 | 1     | 180.00 | 4.60240 | 2  |    |
| 28   | 31 | 29 | 30 | 1     | 180.00 | 4.60240 | 2  |    |
| 29   | 33 | 31 | 32 | 1     | 180.00 | 4.60240 | 2  |    |
| 31   | 35 | 33 | 34 | 1     | 180.00 | 4.60240 | 2  |    |
| 33   | 37 | 35 | 36 | 1     | 180.00 | 4.60240 | 2  |    |

[ system ]

; Name  
PtB-b

[ molecules ]

; Compound #mols  
PtB-b 1

**Table S12.** Force field parameters of Pt-free system in GROMACS format used in this work.

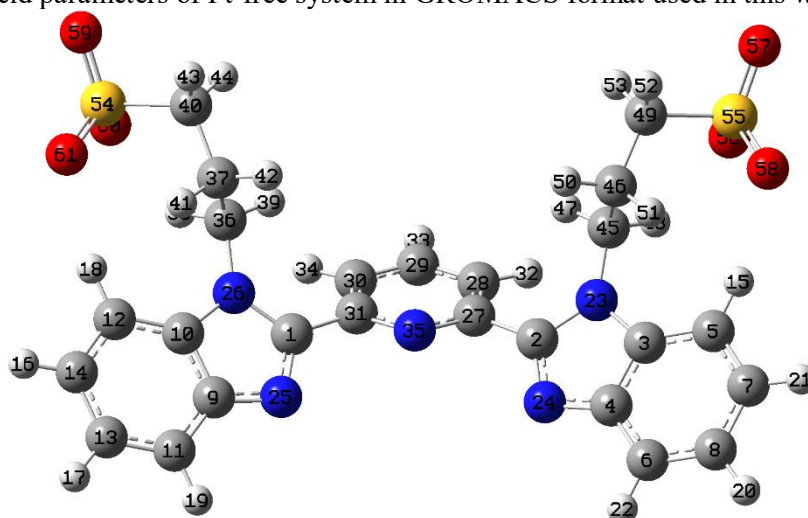

**Pt-free force field parameters**  
**;Pt-free\_GMX.top**

```
[ defaults ]
;nbfunc      comb-rule  gen-pairs  fudgeLJ  fudgeQQ
  1           2          yes         0.5      0.8333

[ atomtypes ]
;name bond_type  mass  charge  ptype  sigma  epsilon  Amb
cc     cc        0.0000  0.0000  A     3.39967e-01  3.59824e-01 ; 1.91 0.0860
ca     ca        0.0000  0.0000  A     3.39967e-01  3.59824e-01 ; 1.91 0.0860
ha     ha        0.0000  0.0000  A     2.59964e-01  6.27600e-02 ; 1.46 0.0150
na     na        0.0000  0.0000  A     3.25000e-01  7.11280e-01 ; 1.82 0.1700
nd     nd        0.0000  0.0000  A     3.25000e-01  7.11280e-01 ; 1.82 0.1700
nb     nb        0.0000  0.0000  A     3.25000e-01  7.11280e-01 ; 1.82 0.1700
c3     c3        0.0000  0.0000  A     3.39967e-01  4.57730e-01 ; 1.91 0.1094
h1     h1        0.0000  0.0000  A     2.47135e-01  6.56888e-02 ; 1.39 0.0157
hc     hc        0.0000  0.0000  A     2.64953e-01  6.56888e-02 ; 1.49 0.0157
s6     s6        0.0000  0.0000  A     3.56359e-01  1.04600e+00 ; 2.00 0.2500
o      o         0.0000  0.0000  A     2.95992e-01  8.78640e-01 ; 1.66 0.2100

[ moleculetype ]
;name      nrexcl
PtF        3

[ atoms ]
; nr type  resi res  atom  cgnr  charge  mass  ;qtot  bond_type
  1  cc   1  PtF  C1   1    0.283166  12.01000 ; qtot 0.283
  2  cc   1  PtF  C2   2    0.283166  12.01000 ; qtot 0.566
  3  ca   1  PtF  C3   3    0.010862  12.01000 ; qtot 0.577
  4  ca   1  PtF  C4   4    0.474664  12.01000 ; qtot 1.052
  5  ca   1  PtF  C5   5   -0.166976  12.01000 ; qtot 0.885
  6  ca   1  PtF  C6   6   -0.329791  12.01000 ; qtot 0.555
  7  ca   1  PtF  C7   7   -0.181568  12.01000 ; qtot 0.374
  8  ca   1  PtF  C8   8   -0.147237  12.01000 ; qtot 0.226
  9  ca   1  PtF  C9   9    0.474664  12.01000 ; qtot 0.701
 10  ca   1  PtF  C10  10    0.010862  12.01000 ; qtot 0.712
 11  ca   1  PtF  C11  11   -0.329791  12.01000 ; qtot 0.382
 12  ca   1  PtF  C12  12   -0.166976  12.01000 ; qtot 0.215
 13  ca   1  PtF  C13  13   -0.147237  12.01000 ; qtot 0.068
 14  ca   1  PtF  C14  14   -0.181568  12.01000 ; qtot -0.114
 15  ha   1  PtF  H1   15    0.194165    1.00800 ; qtot 0.080
 16  ha   1  PtF  H2   16    0.116815    1.00800 ; qtot 0.197
 17  ha   1  PtF  H3   17    0.099511    1.00800 ; qtot 0.297
 18  ha   1  PtF  H4   18    0.194165    1.00800 ; qtot 0.491
 19  ha   1  PtF  H5   19    0.151666    1.00800 ; qtot 0.643
 20  ha   1  PtF  H6   20    0.099511    1.00800 ; qtot 0.742
 21  ha   1  PtF  H7   21    0.116815    1.00800 ; qtot 0.859
 22  ha   1  PtF  H8   22    0.151666    1.00800 ; qtot 1.011
```

|    |    |   |     |     |    |           |                        |
|----|----|---|-----|-----|----|-----------|------------------------|
| 23 | na | 1 | PtF | N1  | 23 | -0.170932 | 14.01000 ; qtot 0.840  |
| 24 | nd | 1 | PtF | N2  | 24 | -0.639284 | 14.01000 ; qtot 0.200  |
| 25 | nd | 1 | PtF | N3  | 25 | -0.639284 | 14.01000 ; qtot -0.439 |
| 26 | na | 1 | PtF | N4  | 26 | -0.170932 | 14.01000 ; qtot -0.610 |
| 27 | ca | 1 | PtF | C15 | 27 | 0.469989  | 12.01000 ; qtot -0.140 |
| 28 | ca | 1 | PtF | C16 | 28 | -0.378064 | 12.01000 ; qtot -0.518 |
| 29 | ca | 1 | PtF | C17 | 29 | 0.085623  | 12.01000 ; qtot -0.432 |
| 30 | ca | 1 | PtF | C18 | 30 | -0.378064 | 12.01000 ; qtot -0.810 |
| 31 | ca | 1 | PtF | C19 | 31 | 0.469989  | 12.01000 ; qtot -0.340 |
| 32 | ha | 1 | PtF | H9  | 32 | 0.141193  | 1.00800 ; qtot -0.199  |
| 33 | ha | 1 | PtF | H10 | 33 | 0.085033  | 1.00800 ; qtot -0.114  |
| 34 | ha | 1 | PtF | H11 | 34 | 0.141193  | 1.00800 ; qtot 0.027   |
| 35 | nb | 1 | PtF | N5  | 35 | -0.544791 | 14.01000 ; qtot -0.518 |
| 36 | c3 | 1 | PtF | C20 | 36 | 0.026149  | 12.01000 ; qtot -0.492 |
| 37 | c3 | 1 | PtF | C21 | 37 | -0.041801 | 12.01000 ; qtot -0.533 |
| 38 | h1 | 1 | PtF | H12 | 38 | 0.058539  | 1.00800 ; qtot -0.475  |
| 39 | h1 | 1 | PtF | H13 | 39 | 0.058539  | 1.00800 ; qtot -0.416  |
| 40 | c3 | 1 | PtF | C22 | 40 | -0.100808 | 12.01000 ; qtot -0.517 |
| 41 | hc | 1 | PtF | H14 | 41 | 0.037303  | 1.00800 ; qtot -0.480  |
| 42 | hc | 1 | PtF | H15 | 42 | 0.037303  | 1.00800 ; qtot -0.443  |
| 43 | h1 | 1 | PtF | H16 | 43 | 0.015993  | 1.00800 ; qtot -0.427  |
| 44 | h1 | 1 | PtF | H17 | 44 | 0.015993  | 1.00800 ; qtot -0.411  |
| 45 | c3 | 1 | PtF | C23 | 45 | 0.026149  | 12.01000 ; qtot -0.384 |
| 46 | c3 | 1 | PtF | C24 | 46 | -0.041801 | 12.01000 ; qtot -0.426 |
| 47 | h1 | 1 | PtF | H18 | 47 | 0.058539  | 1.00800 ; qtot -0.368  |
| 48 | h1 | 1 | PtF | H19 | 48 | 0.058539  | 1.00800 ; qtot -0.309  |
| 49 | c3 | 1 | PtF | C25 | 49 | -0.100808 | 12.01000 ; qtot -0.410 |
| 50 | hc | 1 | PtF | H20 | 50 | 0.037303  | 1.00800 ; qtot -0.373  |
| 51 | hc | 1 | PtF | H21 | 51 | 0.037303  | 1.00800 ; qtot -0.335  |
| 52 | h1 | 1 | PtF | H22 | 52 | 0.015993  | 1.00800 ; qtot -0.319  |
| 53 | h1 | 1 | PtF | H23 | 53 | 0.015993  | 1.00800 ; qtot -0.303  |
| 54 | s6 | 1 | PtF | S1  | 54 | 1.060675  | 32.06000 ; qtot 0.757  |
| 55 | s6 | 1 | PtF | S2  | 55 | 1.060675  | 32.06000 ; qtot 1.818  |
| 56 | o  | 1 | PtF | O1  | 56 | -0.636333 | 16.00000 ; qtot 1.182  |
| 57 | o  | 1 | PtF | O2  | 57 | -0.636333 | 16.00000 ; qtot 0.545  |
| 58 | o  | 1 | PtF | O3  | 58 | -0.636333 | 16.00000 ; qtot -0.091 |
| 59 | o  | 1 | PtF | O4  | 59 | -0.636333 | 16.00000 ; qtot -0.727 |
| 60 | o  | 1 | PtF | O5  | 60 | -0.636333 | 16.00000 ; qtot -1.364 |
| 61 | o  | 1 | PtF | O6  | 61 | -0.636333 | 16.00000 ; qtot -2.000 |

[ bonds ]

| ; | ai | aj | funct | r          | k          |
|---|----|----|-------|------------|------------|
|   | 1  | 25 | 1     | 1.3172e-01 | 4.3965e+05 |
|   | 1  | 26 | 1     | 1.3802e-01 | 3.5631e+05 |
|   | 1  | 31 | 1     | 1.4555e-01 | 3.2225e+05 |
|   | 2  | 23 | 1     | 1.3802e-01 | 3.5631e+05 |
|   | 2  | 24 | 1     | 1.3172e-01 | 4.3965e+05 |
|   | 2  | 27 | 1     | 1.4555e-01 | 3.2225e+05 |
|   | 3  | 4  | 1     | 1.3984e-01 | 3.8585e+05 |
|   | 3  | 5  | 1     | 1.3984e-01 | 3.8585e+05 |
|   | 3  | 23 | 1     | 1.3840e-01 | 3.5187e+05 |
|   | 4  | 6  | 1     | 1.3984e-01 | 3.8585e+05 |
|   | 4  | 24 | 1     | 1.3517e-01 | 3.9137e+05 |
|   | 5  | 7  | 1     | 1.3984e-01 | 3.8585e+05 |
|   | 5  | 15 | 1     | 1.0860e-01 | 2.8937e+05 |
|   | 6  | 8  | 1     | 1.3984e-01 | 3.8585e+05 |
|   | 6  | 22 | 1     | 1.0860e-01 | 2.8937e+05 |
|   | 7  | 8  | 1     | 1.3984e-01 | 3.8585e+05 |
|   | 7  | 21 | 1     | 1.0860e-01 | 2.8937e+05 |
|   | 8  | 20 | 1     | 1.0860e-01 | 2.8937e+05 |
|   | 9  | 10 | 1     | 1.3984e-01 | 3.8585e+05 |
|   | 9  | 11 | 1     | 1.3984e-01 | 3.8585e+05 |
|   | 9  | 25 | 1     | 1.3517e-01 | 3.9137e+05 |
|   | 10 | 12 | 1     | 1.3984e-01 | 3.8585e+05 |
|   | 10 | 26 | 1     | 1.3840e-01 | 3.5187e+05 |
|   | 11 | 13 | 1     | 1.3984e-01 | 3.8585e+05 |
|   | 11 | 19 | 1     | 1.0860e-01 | 2.8937e+05 |
|   | 12 | 14 | 1     | 1.3984e-01 | 3.8585e+05 |
|   | 12 | 18 | 1     | 1.0860e-01 | 2.8937e+05 |
|   | 13 | 14 | 1     | 1.3984e-01 | 3.8585e+05 |
|   | 13 | 17 | 1     | 1.0860e-01 | 2.8937e+05 |
|   | 14 | 16 | 1     | 1.0860e-01 | 2.8937e+05 |
|   | 23 | 45 | 1     | 1.4629e-01 | 2.7422e+05 |

|    |    |   |            |            |
|----|----|---|------------|------------|
| 26 | 36 | 1 | 1.4629e-01 | 2.7422e+05 |
| 27 | 28 | 1 | 1.3984e-01 | 3.8585e+05 |
| 27 | 35 | 1 | 1.3390e-01 | 4.0836e+05 |
| 28 | 29 | 1 | 1.3984e-01 | 3.8585e+05 |
| 28 | 32 | 1 | 1.0860e-01 | 2.8937e+05 |
| 29 | 30 | 1 | 1.3984e-01 | 3.8585e+05 |
| 29 | 33 | 1 | 1.0860e-01 | 2.8937e+05 |
| 30 | 31 | 1 | 1.3984e-01 | 3.8585e+05 |
| 30 | 34 | 1 | 1.0860e-01 | 2.8937e+05 |
| 31 | 35 | 1 | 1.3390e-01 | 4.0836e+05 |
| 36 | 37 | 1 | 1.5375e-01 | 2.5179e+05 |
| 36 | 38 | 1 | 1.0969e-01 | 2.7665e+05 |
| 36 | 39 | 1 | 1.0969e-01 | 2.7665e+05 |
| 37 | 40 | 1 | 1.5375e-01 | 2.5179e+05 |
| 37 | 41 | 1 | 1.0969e-01 | 2.7665e+05 |
| 37 | 42 | 1 | 1.0969e-01 | 2.7665e+05 |
| 40 | 43 | 1 | 1.0969e-01 | 2.7665e+05 |
| 40 | 44 | 1 | 1.0969e-01 | 2.7665e+05 |
| 40 | 54 | 1 | 1.8075e-01 | 1.9539e+05 |
| 45 | 46 | 1 | 1.5375e-01 | 2.5179e+05 |
| 45 | 47 | 1 | 1.0969e-01 | 2.7665e+05 |
| 45 | 48 | 1 | 1.0969e-01 | 2.7665e+05 |
| 46 | 49 | 1 | 1.5375e-01 | 2.5179e+05 |
| 46 | 50 | 1 | 1.0969e-01 | 2.7665e+05 |
| 46 | 51 | 1 | 1.0969e-01 | 2.7665e+05 |
| 49 | 52 | 1 | 1.0969e-01 | 2.7665e+05 |
| 49 | 53 | 1 | 1.0969e-01 | 2.7665e+05 |
| 49 | 55 | 1 | 1.8075e-01 | 1.9539e+05 |
| 54 | 59 | 1 | 1.4533e-01 | 4.2903e+05 |
| 54 | 60 | 1 | 1.4533e-01 | 4.2903e+05 |
| 54 | 61 | 1 | 1.4533e-01 | 4.2903e+05 |
| 55 | 56 | 1 | 1.4533e-01 | 4.2903e+05 |
| 55 | 57 | 1 | 1.4533e-01 | 4.2903e+05 |
| 55 | 58 | 1 | 1.4533e-01 | 4.2903e+05 |

[ pairs ]

| ; | ai | aj | funct |
|---|----|----|-------|
|   | 1  | 11 | 1     |
|   | 1  | 12 | 1     |
|   | 1  | 27 | 1     |
|   | 1  | 29 | 1     |
|   | 1  | 34 | 1     |
|   | 1  | 37 | 1     |
|   | 1  | 38 | 1     |
|   | 1  | 39 | 1     |
|   | 2  | 5  | 1     |
|   | 2  | 6  | 1     |
|   | 2  | 29 | 1     |
|   | 2  | 31 | 1     |
|   | 2  | 32 | 1     |
|   | 2  | 46 | 1     |
|   | 2  | 47 | 1     |
|   | 2  | 48 | 1     |
|   | 3  | 8  | 1     |
|   | 3  | 21 | 1     |
|   | 3  | 22 | 1     |
|   | 3  | 27 | 1     |
|   | 3  | 46 | 1     |
|   | 3  | 47 | 1     |
|   | 3  | 48 | 1     |
|   | 4  | 7  | 1     |
|   | 4  | 15 | 1     |
|   | 4  | 20 | 1     |
|   | 4  | 27 | 1     |
|   | 4  | 45 | 1     |
|   | 5  | 6  | 1     |
|   | 5  | 20 | 1     |
|   | 5  | 24 | 1     |
|   | 5  | 45 | 1     |
|   | 6  | 21 | 1     |
|   | 6  | 23 | 1     |
|   | 7  | 22 | 1     |

|    |    |   |
|----|----|---|
| 7  | 23 | 1 |
| 8  | 15 | 1 |
| 8  | 24 | 1 |
| 9  | 14 | 1 |
| 9  | 17 | 1 |
| 9  | 18 | 1 |
| 9  | 36 | 1 |
| 10 | 13 | 1 |
| 10 | 16 | 1 |
| 10 | 19 | 1 |
| 10 | 37 | 1 |
| 10 | 38 | 1 |
| 10 | 39 | 1 |
| 11 | 12 | 1 |
| 11 | 16 | 1 |
| 11 | 26 | 1 |
| 12 | 17 | 1 |
| 12 | 25 | 1 |
| 12 | 36 | 1 |
| 13 | 18 | 1 |
| 13 | 25 | 1 |
| 14 | 19 | 1 |
| 14 | 26 | 1 |
| 15 | 21 | 1 |
| 15 | 23 | 1 |
| 16 | 17 | 1 |
| 16 | 18 | 1 |
| 17 | 19 | 1 |
| 18 | 26 | 1 |
| 19 | 25 | 1 |
| 20 | 21 | 1 |
| 20 | 22 | 1 |
| 22 | 24 | 1 |
| 23 | 28 | 1 |
| 23 | 35 | 1 |
| 23 | 49 | 1 |
| 23 | 50 | 1 |
| 23 | 51 | 1 |
| 24 | 28 | 1 |
| 24 | 35 | 1 |
| 24 | 45 | 1 |
| 25 | 30 | 1 |
| 25 | 35 | 1 |
| 25 | 36 | 1 |
| 26 | 30 | 1 |
| 26 | 35 | 1 |
| 26 | 40 | 1 |
| 26 | 41 | 1 |
| 26 | 42 | 1 |
| 27 | 30 | 1 |
| 27 | 33 | 1 |
| 27 | 45 | 1 |
| 28 | 31 | 1 |
| 28 | 34 | 1 |
| 29 | 35 | 1 |
| 30 | 32 | 1 |
| 31 | 9  | 1 |
| 31 | 10 | 1 |
| 31 | 33 | 1 |
| 31 | 36 | 1 |
| 32 | 33 | 1 |
| 32 | 35 | 1 |
| 33 | 34 | 1 |
| 34 | 35 | 1 |
| 36 | 43 | 1 |
| 36 | 44 | 1 |
| 36 | 54 | 1 |
| 37 | 59 | 1 |
| 37 | 60 | 1 |
| 37 | 61 | 1 |
| 38 | 40 | 1 |
| 38 | 41 | 1 |

```

38 42 1
39 40 1
39 41 1
39 42 1
41 43 1
41 44 1
41 54 1
42 43 1
42 44 1
42 54 1
43 59 1
43 60 1
43 61 1
44 59 1
44 60 1
44 61 1
45 52 1
45 53 1
45 55 1
46 56 1
46 57 1
46 58 1
47 49 1
47 50 1
47 51 1
48 49 1
48 50 1
48 51 1
50 52 1
50 53 1
50 55 1
51 52 1
51 53 1
51 55 1
52 56 1
52 57 1
52 58 1
53 56 1
53 57 1
53 58 1

```

[ angles ]

```

; ai  aj  ak  funct  theta  cth
  1  25  9   1  1.0488e+02  6.0651e+02
  1  26 10   1  1.1315e+02  5.6400e+02
  1  26 36   1  1.2646e+02  5.1781e+02
  1  31 30   1  1.2079e+02  5.4409e+02
  1  31 35   1  1.1775e+02  5.7505e+02
  2  23  3   1  1.1315e+02  5.6400e+02
  2  23 45   1  1.2646e+02  5.1781e+02
  2  24  4   1  1.0488e+02  6.0651e+02
  2  27 28   1  1.2079e+02  5.4409e+02
  2  27 35   1  1.1775e+02  5.7505e+02
  3  4  6   1  1.2002e+02  5.5748e+02
  3  4 24   1  1.1972e+02  5.8124e+02
  3  5  7   1  1.2002e+02  5.5748e+02
  3  5 15   1  1.1988e+02  4.0317e+02
  3 23 45   1  1.2436e+02  5.2149e+02
  4  3  5   1  1.2002e+02  5.5748e+02
  4  3 23   1  1.1834e+02  5.7806e+02
  4  6  8   1  1.2002e+02  5.5748e+02
  4  6 22   1  1.1988e+02  4.0317e+02
  5  3 23   1  1.1834e+02  5.7806e+02
  5  7  8   1  1.2002e+02  5.5748e+02
  5  7 21   1  1.1988e+02  4.0317e+02
  6  4 24   1  1.1972e+02  5.8124e+02
  6  8  7   1  1.2002e+02  5.5748e+02
  6  8 20   1  1.1988e+02  4.0317e+02
  7  5 15   1  1.1988e+02  4.0317e+02
  7  8 20   1  1.1988e+02  4.0317e+02
  8  6 22   1  1.1988e+02  4.0317e+02
  8  7 21   1  1.1988e+02  4.0317e+02

```



|    |    |    |   |            |            |
|----|----|----|---|------------|------------|
| 9  | 10 | 12 | 1 | 1.2002e+02 | 5.5748e+02 |
| 9  | 10 | 26 | 1 | 1.1834e+02 | 5.7806e+02 |
| 9  | 11 | 13 | 1 | 1.2002e+02 | 5.5748e+02 |
| 9  | 11 | 19 | 1 | 1.1988e+02 | 4.0317e+02 |
| 10 | 9  | 11 | 1 | 1.2002e+02 | 5.5748e+02 |
| 10 | 9  | 25 | 1 | 1.1972e+02 | 5.8124e+02 |
| 10 | 12 | 14 | 1 | 1.2002e+02 | 5.5748e+02 |
| 10 | 12 | 18 | 1 | 1.1988e+02 | 4.0317e+02 |
| 10 | 26 | 36 | 1 | 1.2436e+02 | 5.2149e+02 |
| 11 | 9  | 25 | 1 | 1.1972e+02 | 5.8124e+02 |
| 11 | 13 | 14 | 1 | 1.2002e+02 | 5.5748e+02 |
| 11 | 13 | 17 | 1 | 1.1988e+02 | 4.0317e+02 |
| 12 | 10 | 26 | 1 | 1.1834e+02 | 5.7806e+02 |
| 12 | 14 | 13 | 1 | 1.2002e+02 | 5.5748e+02 |
| 12 | 14 | 16 | 1 | 1.1988e+02 | 4.0317e+02 |
| 13 | 11 | 19 | 1 | 1.1988e+02 | 4.0317e+02 |
| 13 | 14 | 16 | 1 | 1.1988e+02 | 4.0317e+02 |
| 14 | 12 | 18 | 1 | 1.1988e+02 | 4.0317e+02 |
| 14 | 13 | 17 | 1 | 1.1988e+02 | 4.0317e+02 |
| 23 | 2  | 24 | 1 | 1.1222e+02 | 6.2676e+02 |
| 23 | 2  | 27 | 1 | 1.2345e+02 | 5.5463e+02 |
| 23 | 45 | 46 | 1 | 1.1288e+02 | 5.4827e+02 |
| 23 | 45 | 47 | 1 | 1.0878e+02 | 4.1698e+02 |
| 23 | 45 | 48 | 1 | 1.0878e+02 | 4.1698e+02 |
| 24 | 2  | 27 | 1 | 1.2324e+02 | 5.6568e+02 |
| 25 | 1  | 26 | 1 | 1.1222e+02 | 6.2676e+02 |
| 25 | 1  | 31 | 1 | 1.2324e+02 | 5.6568e+02 |
| 26 | 1  | 31 | 1 | 1.2345e+02 | 5.5463e+02 |
| 26 | 36 | 37 | 1 | 1.1288e+02 | 5.4827e+02 |
| 26 | 36 | 38 | 1 | 1.0878e+02 | 4.1698e+02 |
| 26 | 36 | 39 | 1 | 1.0878e+02 | 4.1698e+02 |
| 27 | 28 | 29 | 1 | 1.2002e+02 | 5.5748e+02 |
| 27 | 28 | 32 | 1 | 1.1988e+02 | 4.0317e+02 |
| 27 | 35 | 31 | 1 | 1.1722e+02 | 5.7195e+02 |
| 28 | 27 | 35 | 1 | 1.2294e+02 | 5.7597e+02 |
| 28 | 29 | 30 | 1 | 1.2002e+02 | 5.5748e+02 |
| 28 | 29 | 33 | 1 | 1.1988e+02 | 4.0317e+02 |
| 29 | 28 | 32 | 1 | 1.1988e+02 | 4.0317e+02 |
| 29 | 30 | 31 | 1 | 1.2002e+02 | 5.5748e+02 |
| 29 | 30 | 34 | 1 | 1.1988e+02 | 4.0317e+02 |
| 30 | 29 | 33 | 1 | 1.1988e+02 | 4.0317e+02 |
| 30 | 31 | 35 | 1 | 1.2294e+02 | 5.7597e+02 |
| 31 | 30 | 34 | 1 | 1.1988e+02 | 4.0317e+02 |
| 36 | 37 | 40 | 1 | 1.1151e+02 | 5.2601e+02 |
| 36 | 37 | 41 | 1 | 1.0980e+02 | 3.8777e+02 |
| 36 | 37 | 42 | 1 | 1.0980e+02 | 3.8777e+02 |
| 37 | 36 | 38 | 1 | 1.0956e+02 | 3.8819e+02 |
| 37 | 36 | 39 | 1 | 1.0956e+02 | 3.8819e+02 |
| 37 | 40 | 43 | 1 | 1.0956e+02 | 3.8819e+02 |
| 37 | 40 | 44 | 1 | 1.0956e+02 | 3.8819e+02 |
| 37 | 40 | 54 | 1 | 1.1022e+02 | 5.1940e+02 |
| 38 | 36 | 39 | 1 | 1.0846e+02 | 3.2836e+02 |
| 40 | 37 | 41 | 1 | 1.0980e+02 | 3.8777e+02 |
| 40 | 37 | 42 | 1 | 1.0980e+02 | 3.8777e+02 |
| 40 | 54 | 59 | 1 | 1.0861e+02 | 5.4702e+02 |
| 40 | 54 | 60 | 1 | 1.0861e+02 | 5.4702e+02 |
| 40 | 54 | 61 | 1 | 1.0861e+02 | 5.4702e+02 |
| 41 | 37 | 42 | 1 | 1.0758e+02 | 3.2970e+02 |
| 43 | 40 | 44 | 1 | 1.0846e+02 | 3.2836e+02 |
| 43 | 40 | 54 | 1 | 1.0715e+02 | 3.6141e+02 |
| 44 | 40 | 54 | 1 | 1.0715e+02 | 3.6141e+02 |
| 45 | 46 | 49 | 1 | 1.1151e+02 | 5.2601e+02 |
| 45 | 46 | 50 | 1 | 1.0980e+02 | 3.8777e+02 |
| 45 | 46 | 51 | 1 | 1.0980e+02 | 3.8777e+02 |
| 46 | 45 | 47 | 1 | 1.0956e+02 | 3.8819e+02 |
| 46 | 45 | 48 | 1 | 1.0956e+02 | 3.8819e+02 |
| 46 | 49 | 52 | 1 | 1.0956e+02 | 3.8819e+02 |
| 46 | 49 | 53 | 1 | 1.0956e+02 | 3.8819e+02 |
| 46 | 49 | 55 | 1 | 1.1022e+02 | 5.1940e+02 |
| 47 | 45 | 48 | 1 | 1.0846e+02 | 3.2836e+02 |
| 49 | 46 | 50 | 1 | 1.0980e+02 | 3.8777e+02 |
| 49 | 46 | 51 | 1 | 1.0980e+02 | 3.8777e+02 |

```

49 55 56 1 1.0861e+02 5.4702e+02
49 55 57 1 1.0861e+02 5.4702e+02
49 55 58 1 1.0861e+02 5.4702e+02
50 46 51 1 1.0758e+02 3.2970e+02
52 49 53 1 1.0846e+02 3.2836e+02
52 49 55 1 1.0715e+02 3.6141e+02
53 49 55 1 1.0715e+02 3.6141e+02
56 55 57 1 1.2005e+02 6.1580e+02
56 55 58 1 1.2005e+02 6.1580e+02
57 55 58 1 1.2005e+02 6.1580e+02
59 54 60 1 1.2005e+02 6.1580e+02
59 54 61 1 1.2005e+02 6.1580e+02
60 54 61 1 1.2005e+02 6.1580e+02

```

[ dihedrals ]; probers

; treated as RBs in GROMACS to use combine multiple AMBER torsions per quartet

```

; i j k l func C0 C1 C2 C3 C4 C5
1 25 9 10 3 40.16640 0.00000 -40.16640 0.00000 0.00000 0.00000
1 25 9 11 3 40.16640 0.00000 -40.16640 0.00000 0.00000 0.00000
1 26 10 9 3 2.51040 0.00000 -2.51040 0.00000 0.00000 0.00000
1 26 10 12 3 2.51040 0.00000 -2.51040 0.00000 0.00000 0.00000
1 26 36 37 3 0.00000 0.00000 0.00000 0.00000 0.00000 0.00000
1 26 36 38 3 0.00000 0.00000 0.00000 0.00000 0.00000 0.00000
1 26 36 39 3 0.00000 0.00000 0.00000 0.00000 0.00000 0.00000
1 31 30 29 3 30.33400 0.00000 -30.33400 0.00000 0.00000 0.00000
1 31 30 34 3 30.33400 0.00000 -30.33400 0.00000 0.00000 0.00000
1 31 35 27 3 40.16640 0.00000 -40.16640 0.00000 0.00000 0.00000
2 23 3 4 3 2.51040 0.00000 -2.51040 0.00000 0.00000 0.00000
2 23 3 5 3 2.51040 0.00000 -2.51040 0.00000 0.00000 0.00000
2 23 45 46 3 0.00000 0.00000 0.00000 0.00000 0.00000 0.00000
2 23 45 47 3 0.00000 0.00000 0.00000 0.00000 0.00000 0.00000
2 23 45 48 3 0.00000 0.00000 0.00000 0.00000 0.00000 0.00000
2 24 4 3 3 40.16640 0.00000 -40.16640 0.00000 0.00000 0.00000
2 24 4 6 3 40.16640 0.00000 -40.16640 0.00000 0.00000 0.00000
2 27 28 29 3 30.33400 0.00000 -30.33400 0.00000 0.00000 0.00000
2 27 28 32 3 30.33400 0.00000 -30.33400 0.00000 0.00000 0.00000
2 27 35 31 3 40.16640 0.00000 -40.16640 0.00000 0.00000 0.00000
3 4 6 8 3 30.33400 0.00000 -30.33400 0.00000 0.00000 0.00000
3 4 6 22 3 30.33400 0.00000 -30.33400 0.00000 0.00000 0.00000
3 5 7 8 3 30.33400 0.00000 -30.33400 0.00000 0.00000 0.00000
3 5 7 21 3 30.33400 0.00000 -30.33400 0.00000 0.00000 0.00000
3 23 2 24 3 14.22560 0.00000 -14.22560 0.00000 0.00000 0.00000
3 23 2 27 3 14.22560 0.00000 -14.22560 0.00000 0.00000 0.00000
3 23 45 46 3 0.00000 0.00000 0.00000 0.00000 0.00000 0.00000
3 23 45 47 3 0.00000 0.00000 0.00000 0.00000 0.00000 0.00000
3 23 45 48 3 0.00000 0.00000 0.00000 0.00000 0.00000 0.00000
4 3 5 7 3 30.33400 0.00000 -30.33400 0.00000 0.00000 0.00000
4 3 5 15 3 30.33400 0.00000 -30.33400 0.00000 0.00000 0.00000
4 3 23 45 3 2.51040 0.00000 -2.51040 0.00000 0.00000 0.00000
4 6 8 7 3 30.33400 0.00000 -30.33400 0.00000 0.00000 0.00000
4 6 8 20 3 30.33400 0.00000 -30.33400 0.00000 0.00000 0.00000
4 24 2 23 3 39.74800 0.00000 -39.74800 0.00000 0.00000 0.00000
4 24 2 27 3 39.74800 0.00000 -39.74800 0.00000 0.00000 0.00000
5 3 4 6 3 30.33400 0.00000 -30.33400 0.00000 0.00000 0.00000
5 3 4 24 3 30.33400 0.00000 -30.33400 0.00000 0.00000 0.00000
5 3 23 45 3 2.51040 0.00000 -2.51040 0.00000 0.00000 0.00000
5 7 8 6 3 30.33400 0.00000 -30.33400 0.00000 0.00000 0.00000
5 7 8 20 3 30.33400 0.00000 -30.33400 0.00000 0.00000 0.00000
6 4 3 23 3 30.33400 0.00000 -30.33400 0.00000 0.00000 0.00000
6 8 7 21 3 30.33400 0.00000 -30.33400 0.00000 0.00000 0.00000
7 5 3 23 3 30.33400 0.00000 -30.33400 0.00000 0.00000 0.00000
7 8 6 22 3 30.33400 0.00000 -30.33400 0.00000 0.00000 0.00000
8 6 4 24 3 30.33400 0.00000 -30.33400 0.00000 0.00000 0.00000
8 7 5 15 3 30.33400 0.00000 -30.33400 0.00000 0.00000 0.00000
9 10 12 14 3 30.33400 0.00000 -30.33400 0.00000 0.00000 0.00000
9 10 12 18 3 30.33400 0.00000 -30.33400 0.00000 0.00000 0.00000
9 10 26 36 3 2.51040 0.00000 -2.51040 0.00000 0.00000 0.00000
9 11 13 14 3 30.33400 0.00000 -30.33400 0.00000 0.00000 0.00000
9 11 13 17 3 30.33400 0.00000 -30.33400 0.00000 0.00000 0.00000
10 9 11 13 3 30.33400 0.00000 -30.33400 0.00000 0.00000 0.00000
10 9 11 19 3 30.33400 0.00000 -30.33400 0.00000 0.00000 0.00000
10 12 14 13 3 30.33400 0.00000 -30.33400 0.00000 0.00000 0.00000

```

|    |    |    |    |   |          |         |           |          |         |         |
|----|----|----|----|---|----------|---------|-----------|----------|---------|---------|
| 10 | 12 | 14 | 16 | 3 | 30.33400 | 0.00000 | -30.33400 | 0.00000  | 0.00000 | 0.00000 |
| 10 | 26 | 36 | 37 | 3 | 0.00000  | 0.00000 | 0.00000   | 0.00000  | 0.00000 | 0.00000 |
| 10 | 26 | 36 | 38 | 3 | 0.00000  | 0.00000 | 0.00000   | 0.00000  | 0.00000 | 0.00000 |
| 10 | 26 | 36 | 39 | 3 | 0.00000  | 0.00000 | 0.00000   | 0.00000  | 0.00000 | 0.00000 |
| 11 | 9  | 10 | 12 | 3 | 30.33400 | 0.00000 | -30.33400 | 0.00000  | 0.00000 | 0.00000 |
| 11 | 9  | 10 | 26 | 3 | 30.33400 | 0.00000 | -30.33400 | 0.00000  | 0.00000 | 0.00000 |
| 11 | 13 | 14 | 12 | 3 | 30.33400 | 0.00000 | -30.33400 | 0.00000  | 0.00000 | 0.00000 |
| 11 | 13 | 14 | 16 | 3 | 30.33400 | 0.00000 | -30.33400 | 0.00000  | 0.00000 | 0.00000 |
| 12 | 10 | 9  | 25 | 3 | 30.33400 | 0.00000 | -30.33400 | 0.00000  | 0.00000 | 0.00000 |
| 12 | 10 | 26 | 36 | 3 | 2.51040  | 0.00000 | -2.51040  | 0.00000  | 0.00000 | 0.00000 |
| 12 | 14 | 13 | 17 | 3 | 30.33400 | 0.00000 | -30.33400 | 0.00000  | 0.00000 | 0.00000 |
| 13 | 11 | 9  | 25 | 3 | 30.33400 | 0.00000 | -30.33400 | 0.00000  | 0.00000 | 0.00000 |
| 13 | 14 | 12 | 18 | 3 | 30.33400 | 0.00000 | -30.33400 | 0.00000  | 0.00000 | 0.00000 |
| 14 | 12 | 10 | 26 | 3 | 30.33400 | 0.00000 | -30.33400 | 0.00000  | 0.00000 | 0.00000 |
| 14 | 13 | 11 | 19 | 3 | 30.33400 | 0.00000 | -30.33400 | 0.00000  | 0.00000 | 0.00000 |
| 15 | 5  | 3  | 23 | 3 | 30.33400 | 0.00000 | -30.33400 | 0.00000  | 0.00000 | 0.00000 |
| 15 | 5  | 7  | 21 | 3 | 30.33400 | 0.00000 | -30.33400 | 0.00000  | 0.00000 | 0.00000 |
| 16 | 14 | 12 | 18 | 3 | 30.33400 | 0.00000 | -30.33400 | 0.00000  | 0.00000 | 0.00000 |
| 16 | 14 | 13 | 17 | 3 | 30.33400 | 0.00000 | -30.33400 | 0.00000  | 0.00000 | 0.00000 |
| 17 | 13 | 11 | 19 | 3 | 30.33400 | 0.00000 | -30.33400 | 0.00000  | 0.00000 | 0.00000 |
| 18 | 12 | 10 | 26 | 3 | 30.33400 | 0.00000 | -30.33400 | 0.00000  | 0.00000 | 0.00000 |
| 19 | 11 | 9  | 25 | 3 | 30.33400 | 0.00000 | -30.33400 | 0.00000  | 0.00000 | 0.00000 |
| 20 | 8  | 6  | 22 | 3 | 30.33400 | 0.00000 | -30.33400 | 0.00000  | 0.00000 | 0.00000 |
| 20 | 8  | 7  | 21 | 3 | 30.33400 | 0.00000 | -30.33400 | 0.00000  | 0.00000 | 0.00000 |
| 22 | 6  | 4  | 24 | 3 | 30.33400 | 0.00000 | -30.33400 | 0.00000  | 0.00000 | 0.00000 |
| 23 | 2  | 27 | 28 | 3 | 5.85760  | 0.00000 | -5.85760  | 0.00000  | 0.00000 | 0.00000 |
| 23 | 2  | 27 | 35 | 3 | 5.85760  | 0.00000 | -5.85760  | 0.00000  | 0.00000 | 0.00000 |
| 23 | 3  | 4  | 24 | 3 | 30.33400 | 0.00000 | -30.33400 | 0.00000  | 0.00000 | 0.00000 |
| 23 | 45 | 46 | 49 | 3 | 0.65084  | 1.95253 | 0.00000   | -2.60338 | 0.00000 | 0.00000 |
| 23 | 45 | 46 | 50 | 3 | 0.65084  | 1.95253 | 0.00000   | -2.60338 | 0.00000 | 0.00000 |
| 23 | 45 | 46 | 51 | 3 | 0.65084  | 1.95253 | 0.00000   | -2.60338 | 0.00000 | 0.00000 |
| 24 | 2  | 23 | 45 | 3 | 14.22560 | 0.00000 | -14.22560 | 0.00000  | 0.00000 | 0.00000 |
| 24 | 2  | 27 | 28 | 3 | 5.85760  | 0.00000 | -5.85760  | 0.00000  | 0.00000 | 0.00000 |
| 24 | 2  | 27 | 35 | 3 | 5.85760  | 0.00000 | -5.85760  | 0.00000  | 0.00000 | 0.00000 |
| 25 | 1  | 26 | 10 | 3 | 14.22560 | 0.00000 | -14.22560 | 0.00000  | 0.00000 | 0.00000 |
| 25 | 1  | 26 | 36 | 3 | 14.22560 | 0.00000 | -14.22560 | 0.00000  | 0.00000 | 0.00000 |
| 25 | 1  | 31 | 30 | 3 | 5.85760  | 0.00000 | -5.85760  | 0.00000  | 0.00000 | 0.00000 |
| 25 | 1  | 31 | 35 | 3 | 5.85760  | 0.00000 | -5.85760  | 0.00000  | 0.00000 | 0.00000 |
| 25 | 9  | 10 | 26 | 3 | 30.33400 | 0.00000 | -30.33400 | 0.00000  | 0.00000 | 0.00000 |
| 26 | 1  | 25 | 9  | 3 | 39.74800 | 0.00000 | -39.74800 | 0.00000  | 0.00000 | 0.00000 |
| 26 | 1  | 31 | 30 | 3 | 5.85760  | 0.00000 | -5.85760  | 0.00000  | 0.00000 | 0.00000 |
| 26 | 1  | 31 | 35 | 3 | 5.85760  | 0.00000 | -5.85760  | 0.00000  | 0.00000 | 0.00000 |
| 26 | 36 | 37 | 40 | 3 | 0.65084  | 1.95253 | 0.00000   | -2.60338 | 0.00000 | 0.00000 |
| 26 | 36 | 37 | 41 | 3 | 0.65084  | 1.95253 | 0.00000   | -2.60338 | 0.00000 | 0.00000 |
| 26 | 36 | 37 | 42 | 3 | 0.65084  | 1.95253 | 0.00000   | -2.60338 | 0.00000 | 0.00000 |
| 27 | 2  | 23 | 45 | 3 | 14.22560 | 0.00000 | -14.22560 | 0.00000  | 0.00000 | 0.00000 |
| 27 | 28 | 29 | 30 | 3 | 30.33400 | 0.00000 | -30.33400 | 0.00000  | 0.00000 | 0.00000 |
| 27 | 28 | 29 | 33 | 3 | 30.33400 | 0.00000 | -30.33400 | 0.00000  | 0.00000 | 0.00000 |
| 27 | 35 | 31 | 30 | 3 | 40.16640 | 0.00000 | -40.16640 | 0.00000  | 0.00000 | 0.00000 |
| 28 | 27 | 35 | 31 | 3 | 40.16640 | 0.00000 | -40.16640 | 0.00000  | 0.00000 | 0.00000 |
| 28 | 29 | 30 | 31 | 3 | 30.33400 | 0.00000 | -30.33400 | 0.00000  | 0.00000 | 0.00000 |
| 28 | 29 | 30 | 34 | 3 | 30.33400 | 0.00000 | -30.33400 | 0.00000  | 0.00000 | 0.00000 |
| 29 | 28 | 27 | 35 | 3 | 30.33400 | 0.00000 | -30.33400 | 0.00000  | 0.00000 | 0.00000 |
| 29 | 30 | 31 | 35 | 3 | 30.33400 | 0.00000 | -30.33400 | 0.00000  | 0.00000 | 0.00000 |
| 30 | 29 | 28 | 32 | 3 | 30.33400 | 0.00000 | -30.33400 | 0.00000  | 0.00000 | 0.00000 |
| 31 | 1  | 25 | 9  | 3 | 39.74800 | 0.00000 | -39.74800 | 0.00000  | 0.00000 | 0.00000 |
| 31 | 1  | 26 | 10 | 3 | 14.22560 | 0.00000 | -14.22560 | 0.00000  | 0.00000 | 0.00000 |
| 31 | 1  | 26 | 36 | 3 | 14.22560 | 0.00000 | -14.22560 | 0.00000  | 0.00000 | 0.00000 |
| 31 | 30 | 29 | 33 | 3 | 30.33400 | 0.00000 | -30.33400 | 0.00000  | 0.00000 | 0.00000 |
| 32 | 28 | 27 | 35 | 3 | 30.33400 | 0.00000 | -30.33400 | 0.00000  | 0.00000 | 0.00000 |
| 32 | 28 | 29 | 33 | 3 | 30.33400 | 0.00000 | -30.33400 | 0.00000  | 0.00000 | 0.00000 |
| 33 | 29 | 30 | 34 | 3 | 30.33400 | 0.00000 | -30.33400 | 0.00000  | 0.00000 | 0.00000 |
| 34 | 30 | 31 | 35 | 3 | 30.33400 | 0.00000 | -30.33400 | 0.00000  | 0.00000 | 0.00000 |
| 36 | 37 | 40 | 43 | 3 | 0.65084  | 1.95253 | 0.00000   | -2.60338 | 0.00000 | 0.00000 |
| 36 | 37 | 40 | 44 | 3 | 0.65084  | 1.95253 | 0.00000   | -2.60338 | 0.00000 | 0.00000 |
| 36 | 37 | 40 | 54 | 3 | 0.65084  | 1.95253 | 0.00000   | -2.60338 | 0.00000 | 0.00000 |
| 37 | 40 | 54 | 59 | 3 | 0.60436  | 1.81307 | 0.00000   | -2.41742 | 0.00000 | 0.00000 |
| 37 | 40 | 54 | 60 | 3 | 0.60436  | 1.81307 | 0.00000   | -2.41742 | 0.00000 | 0.00000 |
| 37 | 40 | 54 | 61 | 3 | 0.60436  | 1.81307 | 0.00000   | -2.41742 | 0.00000 | 0.00000 |
| 38 | 36 | 37 | 40 | 3 | 0.65084  | 1.95253 | 0.00000   | -2.60338 | 0.00000 | 0.00000 |
| 38 | 36 | 37 | 41 | 3 | 0.65084  | 1.95253 | 0.00000   | -2.60338 | 0.00000 | 0.00000 |
| 38 | 36 | 37 | 42 | 3 | 0.65084  | 1.95253 | 0.00000   | -2.60338 | 0.00000 | 0.00000 |

|    |    |    |    |   |         |         |         |          |         |         |
|----|----|----|----|---|---------|---------|---------|----------|---------|---------|
| 39 | 36 | 37 | 40 | 3 | 0.65084 | 1.95253 | 0.00000 | -2.60338 | 0.00000 | 0.00000 |
| 39 | 36 | 37 | 41 | 3 | 0.65084 | 1.95253 | 0.00000 | -2.60338 | 0.00000 | 0.00000 |
| 39 | 36 | 37 | 42 | 3 | 0.65084 | 1.95253 | 0.00000 | -2.60338 | 0.00000 | 0.00000 |
| 41 | 37 | 40 | 43 | 3 | 0.65084 | 1.95253 | 0.00000 | -2.60338 | 0.00000 | 0.00000 |
| 41 | 37 | 40 | 44 | 3 | 0.65084 | 1.95253 | 0.00000 | -2.60338 | 0.00000 | 0.00000 |
| 41 | 37 | 40 | 54 | 3 | 0.65084 | 1.95253 | 0.00000 | -2.60338 | 0.00000 | 0.00000 |
| 42 | 37 | 40 | 43 | 3 | 0.65084 | 1.95253 | 0.00000 | -2.60338 | 0.00000 | 0.00000 |
| 42 | 37 | 40 | 44 | 3 | 0.65084 | 1.95253 | 0.00000 | -2.60338 | 0.00000 | 0.00000 |
| 42 | 37 | 40 | 54 | 3 | 0.65084 | 1.95253 | 0.00000 | -2.60338 | 0.00000 | 0.00000 |
| 43 | 40 | 54 | 59 | 3 | 0.60436 | 1.81307 | 0.00000 | -2.41742 | 0.00000 | 0.00000 |
| 43 | 40 | 54 | 60 | 3 | 0.60436 | 1.81307 | 0.00000 | -2.41742 | 0.00000 | 0.00000 |
| 43 | 40 | 54 | 61 | 3 | 0.60436 | 1.81307 | 0.00000 | -2.41742 | 0.00000 | 0.00000 |
| 44 | 40 | 54 | 59 | 3 | 0.60436 | 1.81307 | 0.00000 | -2.41742 | 0.00000 | 0.00000 |
| 44 | 40 | 54 | 60 | 3 | 0.60436 | 1.81307 | 0.00000 | -2.41742 | 0.00000 | 0.00000 |
| 44 | 40 | 54 | 61 | 3 | 0.60436 | 1.81307 | 0.00000 | -2.41742 | 0.00000 | 0.00000 |
| 45 | 46 | 49 | 52 | 3 | 0.65084 | 1.95253 | 0.00000 | -2.60338 | 0.00000 | 0.00000 |
| 45 | 46 | 49 | 53 | 3 | 0.65084 | 1.95253 | 0.00000 | -2.60338 | 0.00000 | 0.00000 |
| 45 | 46 | 49 | 55 | 3 | 0.65084 | 1.95253 | 0.00000 | -2.60338 | 0.00000 | 0.00000 |
| 46 | 49 | 55 | 56 | 3 | 0.60436 | 1.81307 | 0.00000 | -2.41742 | 0.00000 | 0.00000 |
| 46 | 49 | 55 | 57 | 3 | 0.60436 | 1.81307 | 0.00000 | -2.41742 | 0.00000 | 0.00000 |
| 46 | 49 | 55 | 58 | 3 | 0.60436 | 1.81307 | 0.00000 | -2.41742 | 0.00000 | 0.00000 |
| 47 | 45 | 46 | 49 | 3 | 0.65084 | 1.95253 | 0.00000 | -2.60338 | 0.00000 | 0.00000 |
| 47 | 45 | 46 | 50 | 3 | 0.65084 | 1.95253 | 0.00000 | -2.60338 | 0.00000 | 0.00000 |
| 47 | 45 | 46 | 51 | 3 | 0.65084 | 1.95253 | 0.00000 | -2.60338 | 0.00000 | 0.00000 |
| 48 | 45 | 46 | 49 | 3 | 0.65084 | 1.95253 | 0.00000 | -2.60338 | 0.00000 | 0.00000 |
| 48 | 45 | 46 | 50 | 3 | 0.65084 | 1.95253 | 0.00000 | -2.60338 | 0.00000 | 0.00000 |
| 48 | 45 | 46 | 51 | 3 | 0.65084 | 1.95253 | 0.00000 | -2.60338 | 0.00000 | 0.00000 |
| 50 | 46 | 49 | 52 | 3 | 0.65084 | 1.95253 | 0.00000 | -2.60338 | 0.00000 | 0.00000 |
| 50 | 46 | 49 | 53 | 3 | 0.65084 | 1.95253 | 0.00000 | -2.60338 | 0.00000 | 0.00000 |
| 50 | 46 | 49 | 55 | 3 | 0.65084 | 1.95253 | 0.00000 | -2.60338 | 0.00000 | 0.00000 |
| 51 | 46 | 49 | 52 | 3 | 0.65084 | 1.95253 | 0.00000 | -2.60338 | 0.00000 | 0.00000 |
| 51 | 46 | 49 | 53 | 3 | 0.65084 | 1.95253 | 0.00000 | -2.60338 | 0.00000 | 0.00000 |
| 51 | 46 | 49 | 55 | 3 | 0.65084 | 1.95253 | 0.00000 | -2.60338 | 0.00000 | 0.00000 |
| 52 | 49 | 55 | 56 | 3 | 0.60436 | 1.81307 | 0.00000 | -2.41742 | 0.00000 | 0.00000 |
| 52 | 49 | 55 | 57 | 3 | 0.60436 | 1.81307 | 0.00000 | -2.41742 | 0.00000 | 0.00000 |
| 52 | 49 | 55 | 58 | 3 | 0.60436 | 1.81307 | 0.00000 | -2.41742 | 0.00000 | 0.00000 |
| 53 | 49 | 55 | 56 | 3 | 0.60436 | 1.81307 | 0.00000 | -2.41742 | 0.00000 | 0.00000 |
| 53 | 49 | 55 | 57 | 3 | 0.60436 | 1.81307 | 0.00000 | -2.41742 | 0.00000 | 0.00000 |
| 53 | 49 | 55 | 58 | 3 | 0.60436 | 1.81307 | 0.00000 | -2.41742 | 0.00000 | 0.00000 |

[ dihedrals ] ; impropers

; treated as propers in GROMACS to use correct AMBER analytical function

| i  | j  | k  | l  | func | phase  | kd      | pn |
|----|----|----|----|------|--------|---------|----|
| 1  | 26 | 10 | 36 | 1    | 180.00 | 4.60240 | 2  |
| 3  | 6  | 4  | 24 | 1    | 180.00 | 4.60240 | 2  |
| 3  | 7  | 5  | 15 | 1    | 180.00 | 4.60240 | 2  |
| 4  | 5  | 3  | 23 | 1    | 180.00 | 4.60240 | 2  |
| 4  | 8  | 6  | 22 | 1    | 180.00 | 4.60240 | 2  |
| 5  | 8  | 7  | 21 | 1    | 180.00 | 4.60240 | 2  |
| 6  | 7  | 8  | 20 | 1    | 180.00 | 4.60240 | 2  |
| 9  | 12 | 10 | 26 | 1    | 180.00 | 4.60240 | 2  |
| 9  | 13 | 11 | 19 | 1    | 180.00 | 4.60240 | 2  |
| 10 | 11 | 9  | 25 | 1    | 180.00 | 4.60240 | 2  |
| 10 | 14 | 12 | 18 | 1    | 180.00 | 4.60240 | 2  |
| 11 | 14 | 13 | 17 | 1    | 180.00 | 4.60240 | 2  |
| 12 | 13 | 14 | 16 | 1    | 180.00 | 4.60240 | 2  |
| 25 | 1  | 26 | 31 | 1    | 180.00 | 4.60240 | 2  |
| 27 | 23 | 2  | 24 | 1    | 180.00 | 4.60240 | 2  |
| 27 | 29 | 28 | 32 | 1    | 180.00 | 4.60240 | 2  |
| 28 | 2  | 27 | 35 | 1    | 180.00 | 4.60240 | 2  |
| 28 | 30 | 29 | 33 | 1    | 180.00 | 4.60240 | 2  |
| 29 | 31 | 30 | 34 | 1    | 180.00 | 4.60240 | 2  |
| 30 | 1  | 31 | 35 | 1    | 180.00 | 4.60240 | 2  |
| 45 | 3  | 23 | 2  | 1    | 180.00 | 4.60240 | 2  |

[ system ]

PtF

[ molecules ]

; Compound nmols

PtF 1

## References

1. S. Y.-L. Leung, K. M.-C. Wong, V. W.-W. Yam, Self-assembly of alkynylplatinum(II) terpyridine amphiphiles into nanostructures via steric control and metal–metal interactions. *Proc. Natl. Acad. Sci. U S A* **113**, 2845-2850 (2016).
2. M. H.-Y. Chan, M. Ng, S. Y.-L. Leung, W. H. Lam, V. W.-W. Yam, Synthesis of luminescent platinum(II) 2,6-bis(*N*-dodecylbenzimidazol-2'-yl)pyridine foldamers and their supramolecular assembly and metallogel formation. *J. Am. Chem. Soc.* **139**, 8639-8645 (2017).
3. L. Jiang *et al.*, Real-time monitoring of hydrophobic aggregation reveals a critical role of cooperativity in hydrophobic effect. *Nat. Commun.* **8**, 15639 (2017).
4. J. Wang, R. M. Wolf, J. W. Caldwell, P. A. Kollman, D. A. Case, Development and Testing of A General Amber Force Field. *J. Comput. Chem.* **25**, 1157-1174 (2004).
5. A. D. MacKerell, J. Wiorkiewicz-Kuczera, M. Karplus, An all-atom empirical energy function for the simulation of nucleic acids. *J. Am. Chem. Soc.* **117**, 11946-11975 (1995).
6. Y. Duan *et al.*, A point-charge force field for molecular mechanics simulations of proteins based on condensed-phase quantum mechanical calculations. *J. Comput. Chem.* **24**, 1999-2012 (2003).
7. M. J. Frisch *et al.*, *Gaussian, Inc.* (Wallingford CT, 2009).
8. P. V. Petrović, G. V. Janjić, S. D. Zarić, Stacking interactions between square-planar metal complexes with 2,2'-bipyridine ligands. Analysis of crystal structures and quantum chemical calculations. *Cryst. Growth Des.* **14**, 3880-3889 (2014).
9. J. Tao, J. P. Perdew, V. N. Staroverov, G. E. Scuseria, Climbing the density functional ladder: Nonempirical meta-generalized gradient approximation designed for molecules and solids. *Phys. Rev. Lett.* **91**, 146401 (2003).
10. S. Grimme, J. Antony, S. Ehrlich, H. Krieg, A consistent and accurate ab initio parametrization of density functional dispersion correction (DFT-D) for the 94 elements H-Pu. *J. Chem. Phys.* **132**, 154104 (2010).
11. F. Weigend, R. Ahlrichs, Balanced basis sets of split valence, triple zeta valence and quadruple zeta valence quality for H to Rn: Design and assessment of accuracy. *Phys. Chem. Chem. Phys.* **7**, 3297-3305 (2005).
12. W. D. Cornell, P. Cieplak, C. I. Bayly, P. A. Kollman, Application of RESP charges to calculate conformational energies, hydrogen bond energies, and free energies of solvation. *J. Am. Chem. Soc.* **115**, 9620-9631 (1993).
13. C. I. Bayly, P. Cieplak, W. Cornell, P. A. Kollman, A well-behaved electrostatic potential based method using charge restraints for deriving atomic charges: the RESP model. *J. Phys. Chem.* **97**, 10269-10280 (1993).
14. U. C. Singh, P. A. Kollman, An approach to computing electrostatic charges for molecules. *J. Comput. Chem.* **5**, 129-145 (1984).
15. A. Y.-Y. Tam, W. H. Lam, K. M.-C. Wong, N. Zhu, V. W.-W. Yam, Luminescent alkynylplatinum(II) complexes of 2,6-bis(*N*-alkylbenzimidazol-2'-yl)pyridine-type ligands with ready tunability of the nature of the emissive states by solvent and electronic property modulation. *Chem. Eur. J.* **14**, 4562-4576 (2008).
16. L. J. Grove, A. G. Oliver, J. A. Krause, W. B. Connick, Structure of a crystalline vapochromic Platinum(II) salt. *Inorg. Chem.* **47**, 1408-1410 (2008).
17. H. J. C. Berendsen, J. P. M. Postma, W. F. v. Gunsteren, A. DiNola, J. R. Haak, Molecular dynamics with coupling to an external bath. *J. Chem. Phys.* **81**, 3684-3690 (1984).
18. G. Bussi, D. Donadio, M. Parrinello, Canonical sampling through velocity rescaling. *J. Chem. Phys.* **126**, 014101 (2007).
19. M. Parrinello, A. Rahman, Polymorphic transitions in single crystals: A new molecular dynamics method. *J. Appl. Phys.* **52**, 7182-7190 (1981).
20. S. Yao, J. P. Plasteras, L. G. Marzilli, A molecular mechanics AMBER-type force field for modeling platinum complexes of guanine derivatives. *Inorg. Chem.* **33**, 6061-6077 (1994).
21. Y. Zhao, D. G. Truhlar, The M06 suite of density functionals for main group thermochemistry, thermochemical kinetics, noncovalent interactions, excited states, and transition elements: two new functionals and systematic testing of four M06-class functionals and 12 other functionals. *Theor. Chem. Acc.* **120**, 215-241 (2008).
22. A. V. Marenich, C. J. Cramer, D. G. Truhlar, Universal solvation model based on solute electron density and on a continuum model of the solvent defined by the bulk dielectric constant and atomic surface tensions. *J. Phys. Chem. B* **113**, 6378-6396 (2009).
23. D. Andrae, U. Häußermann, M. Dolg, H. Stoll, H. Preuß, Energy-adjusted ab initio pseudopotentials for the second and third row transition elements. *Theor. Chim. Acta.* **77**, 123-141 (1990).
24. M. Dolg, P. Pyykkö, N. Runeberg, Calculated Structure and Optical Properties of  $Tl_2Pt(CN)_4$ . *Inorg. Chem.* **35**, 7450-7451 (1996).
25. W. J. Hehre, R. Ditchfield, J. A. Pople, Self-Consistent Molecular Orbital Methods. XII. Further Extensions of Gaussian-Type Basis Sets for Use in Molecular Orbital Studies of Organic Molecules. *J. Chem. Phys.* **56**, 2257-2261 (1972).
26. J. D. Dill, J. A. Pople, Self-consistent molecular orbital methods. XV. Extended Gaussian-type basis sets for lithium, beryllium, and boron. *J. Chem. Phys.* **62**, 2921-2923 (1975).
27. P. C. Hariharan, J. A. Pople, The influence of polarization functions on molecular orbital hydrogenation energies. *Theor. Chim. Acta.* **28**, 213-222 (1973).

28. M. M. Francl *et al.*, Self-consistent molecular orbital methods. XXIII. A polarization-type basis set for second-row elements. *J. Chem. Phys.* **77**, 3654-3665 (1982).
29. J. Contreras-García *et al.*, NCIPLOT: A program for plotting noncovalent interaction regions. *J. Chem. Theory Comput.* **7**, 625-632 (2011).
